# Supplementary material
Source: publisher figshare collection journal article supplement (https://tandf.figshare.com/articles/dataset/_/23786454)
Supplement: Supplementary file 1 [file 2]

## Sheet: data
Date	ID#	Vehicle model	Series	Reg. date	age
2009-01-01	6B	MERCEDES BENZ 416CDI/3550	100 Series	2007-09-08	481
2009-01-05	6B	MERCEDES BENZ 416CDI/3550	100 Series	2007-09-08	485
2009-01-07 10:00:00	6B	MERCEDES BENZ 416CDI/3550	100 Series	2007-09-08	487.417
2009-01-15 12:00:00	6B	MERCEDES BENZ 416CDI/3550	100 Series	2007-09-08	495.5
2009-07-19 09:40:00	6B	MERCEDES BENZ 416CDI/3550	100 Series	2007-09-08	680.403
2009-07-25 02:00:00	6B	MERCEDES BENZ 416CDI/3550	100 Series	2007-09-08	686.083
2009-08-20 15:00:00	6B	MERCEDES BENZ 416CDI/3550	100 Series	2007-09-08	712.625
2009-09-28 08:00:00	6B	MERCEDES BENZ 416CDI/3550	100 Series	2007-09-08	751.333
2009-09-29 18:20:00	6B	MERCEDES BENZ 416CDI/3550	100 Series	2007-09-08	752.764
2009-10-26 20:30:00	6B	MERCEDES BENZ 416CDI/3550	100 Series	2007-09-08	779.854
2009-11-03 21:45:00	6B	MERCEDES BENZ 416CDI/3550	100 Series	2007-09-08	787.906
2010-01-11 18:10:00	6B	MERCEDES BENZ 416CDI/3550	100 Series	2007-09-08	856.757
2010-01-12 09:30:00	6B	MERCEDES BENZ 416CDI/3550	100 Series	2007-09-08	857.396
2010-01-14 08:00:00	6B	MERCEDES BENZ 416CDI/3550	100 Series	2007-09-08	859.333
2010-01-28 09:20:00	6B	MERCEDES BENZ 416CDI/3550	100 Series	2007-09-08	873.389
2010-02-08 13:30:00	6B	MERCEDES BENZ 416CDI/3550	100 Series	2007-09-08	884.562
2010-02-12 06:50:00	6B	MERCEDES BENZ 416CDI/3550	100 Series	2007-09-08	888.285
2010-05-04 17:30:00	6B	MERCEDES BENZ 416CDI/3550	100 Series	2007-09-08	969.729
2010-09-14 21:20:00	6B	MERCEDES BENZ 416CDI/3550	100 Series	2007-09-08	1102.89
2010-11-14 11:15:00	6B	MERCEDES BENZ 416CDI/3550	100 Series	2007-09-08	1163.47
2011-03-18 08:45:00	6B	MERCEDES BENZ 416CDI/3550	100 Series	2007-09-08	1287.36
2011-04-12 20:20:00	6B	MERCEDES BENZ 416CDI/3550	100 Series	2007-09-08	1312.85
2011-06-02 12:00:00	6B	MERCEDES BENZ 416CDI/3550	100 Series	2007-09-08	1363.5
2012-03-06 09:00:00	6B	MERCEDES BENZ 416CDI/3550	100 Series	2007-09-08	1641.38
2012-04-25 08:00:00	6B	MERCEDES BENZ 416CDI/3550	100 Series	2007-09-08	1691.33
2012-06-05 11:30:00	6B	MERCEDES BENZ 416CDI/3550	100 Series	2007-09-08	1732.48
2012-06-10 09:30:00	6B	MERCEDES BENZ 416CDI/3550	100 Series	2007-09-08	1737.4
2012-06-11 21:45:00	6B	MERCEDES BENZ 416CDI/3550	100 Series	2007-09-08	1738.91
2012-06-21 22:15:00	6B	MERCEDES BENZ 416CDI/3550	100 Series	2007-09-08	1748.93
2012-06-21 22:15:00	6B	MERCEDES BENZ 416CDI/3550	100 Series	2007-09-08	1748.93
2012-07-27 00:45:00	6B	MERCEDES BENZ 416CDI/3550	100 Series	2007-09-08	1784.03
2012-08-13	6B	MERCEDES BENZ 416CDI/3550	100 Series	2007-09-08	1801
2012-08-28 13:45:00	6B	MERCEDES BENZ 416CDI/3550	100 Series	2007-09-08	1816.57
2013-03-01	6B	MERCEDES BENZ 416CDI/3550	100 Series	2007-09-08	2001
2009-01-01	7Z	MERCEDES BENZ 416CDI/3550	100 Series	2007-09-11	478
2009-01-29 09:40:00	7Z	MERCEDES BENZ 416CDI/3550	100 Series	2007-09-11	506.403
2009-04-20 10:00:00	7Z	MERCEDES BENZ 416CDI/3550	100 Series	2007-09-11	587.417
2009-05-31 20:40:00	7Z	MERCEDES BENZ 416CDI/3550	100 Series	2007-09-11	628.861
2009-06-03 08:15:00	7Z	MERCEDES BENZ 416CDI/3550	100 Series	2007-09-11	631.344
2009-06-12 19:00:00	7Z	MERCEDES BENZ 416CDI/3550	100 Series	2007-09-11	640.792
2009-07-25 08:40:00	7Z	MERCEDES BENZ 416CDI/3550	100 Series	2007-09-11	683.361
2009-08-12 08:30:00	7Z	MERCEDES BENZ 416CDI/3550	100 Series	2007-09-11	701.354
2009-10-15 13:00:00	7Z	MERCEDES BENZ 416CDI/3550	100 Series	2007-09-11	765.542
2009-10-18 22:00:00	7Z	MERCEDES BENZ 416CDI/3550	100 Series	2007-09-11	768.917
2009-10-19 12:15:00	7Z	MERCEDES BENZ 416CDI/3550	100 Series	2007-09-11	769.51
2009-12-12 08:55:00	7Z	MERCEDES BENZ 416CDI/3550	100 Series	2007-09-11	823.372
2010-01-27 22:00:00	7Z	MERCEDES BENZ 416CDI/3550	100 Series	2007-09-11	869.917
2010-02-18 20:30:00	7Z	MERCEDES BENZ 416CDI/3550	100 Series	2007-09-11	891.854
2010-02-23 21:15:00	7Z	MERCEDES BENZ 416CDI/3550	100 Series	2007-09-11	896.885
2010-03-07 14:30:00	7Z	MERCEDES BENZ 416CDI/3550	100 Series	2007-09-11	908.604
2010-04-03 08:30:00	7Z	MERCEDES BENZ 416CDI/3550	100 Series	2007-09-11	935.354
2010-10-25 10:45:00	7Z	MERCEDES BENZ 416CDI/3550	100 Series	2007-09-11	1140.45
2010-11-18 15:00:00	7Z	MERCEDES BENZ 416CDI/3550	100 Series	2007-09-11	1164.62
2011-02-04 12:00:00	7Z	MERCEDES BENZ 416CDI/3550	100 Series	2007-09-11	1242.5
2011-10-06 08:00:00	7Z	MERCEDES BENZ 416CDI/3550	100 Series	2007-09-11	1486.33
2011-12-28 21:30:00	7Z	MERCEDES BENZ 416CDI/3550	100 Series	2007-09-11	1569.9
2012-01-27 13:00:00	7Z	MERCEDES BENZ 416CDI/3550	100 Series	2007-09-11	1599.54
2012-01-31 08:30:00	7Z	MERCEDES BENZ 416CDI/3550	100 Series	2007-09-11	1603.35
2012-07-14 09:30:00	7Z	MERCEDES BENZ 416CDI/3550	100 Series	2007-09-11	1768.4
2012-07-20 17:00:00	7Z	MERCEDES BENZ 416CDI/3550	100 Series	2007-09-11	1774.71
2012-08-29 18:30:00	7Z	MERCEDES BENZ 416CDI/3550	100 Series	2007-09-11	1814.77
2012-09-03 21:00:00	7Z	MERCEDES BENZ 416CDI/3550	100 Series	2007-09-11	1819.88
2013-01-16 17:30:00	7Z	MERCEDES BENZ 416CDI/3550	100 Series	2007-09-11	1954.73
2013-01-29 09:30:00	7Z	MERCEDES BENZ 416CDI/3550	100 Series	2007-09-11	1967.4
2013-02-01 11:15:00	7Z	MERCEDES BENZ 416CDI/3550	100 Series	2007-09-11	1970.47
2013-02-03 08:00:00	7Z	MERCEDES BENZ 416CDI/3550	100 Series	2007-09-11	1972.33
2013-02-08 09:45:00	7Z	MERCEDES BENZ 416CDI/3550	100 Series	2007-09-11	1977.41
2013-02-11 01:45:00	7Z	MERCEDES BENZ 416CDI/3550	100 Series	2007-09-11	1980.07
2013-02-19 16:30:00	7Z	MERCEDES BENZ 416CDI/3550	100 Series	2007-09-11	1988.69
2013-03-01	7Z	MERCEDES BENZ 416CDI/3550	100 Series	2007-09-11	1998
2009-01-01	8X	MERCEDES BENZ 416CDI/3550	100 Series	2007-09-12	477
2009-01-04 16:40:00	8X	MERCEDES BENZ 416CDI/3550	100 Series	2007-09-12	480.694
2009-02-04 16:40:00	8X	MERCEDES BENZ 416CDI/3550	100 Series	2007-09-12	511.694
2009-02-05 08:15:00	8X	MERCEDES BENZ 416CDI/3550	100 Series	2007-09-12	512.344
2009-05-09 07:45:00	8X	MERCEDES BENZ 416CDI/3550	100 Series	2007-09-12	605.323
2009-05-10 21:30:00	8X	MERCEDES BENZ 416CDI/3550	100 Series	2007-09-12	606.896
2009-06-22 09:00:00	8X	MERCEDES BENZ 416CDI/3550	100 Series	2007-09-12	649.375
2009-08-02 20:45:00	8X	MERCEDES BENZ 416CDI/3550	100 Series	2007-09-12	690.865
2009-08-15 08:20:00	8X	MERCEDES BENZ 416CDI/3550	100 Series	2007-09-12	703.347
2009-08-28 15:00:00	8X	MERCEDES BENZ 416CDI/3550	100 Series	2007-09-12	716.625
2009-10-07 10:50:00	8X	MERCEDES BENZ 416CDI/3550	100 Series	2007-09-12	756.451
2009-10-26 22:35:00	8X	MERCEDES BENZ 416CDI/3550	100 Series	2007-09-12	775.941
2009-12-07 11:30:00	8X	MERCEDES BENZ 416CDI/3550	100 Series	2007-09-12	817.479
2009-12-11 14:30:00	8X	MERCEDES BENZ 416CDI/3550	100 Series	2007-09-12	821.604
2009-12-19 15:00:00	8X	MERCEDES BENZ 416CDI/3550	100 Series	2007-09-12	829.625
2010-01-24 10:00:00	8X	MERCEDES BENZ 416CDI/3550	100 Series	2007-09-12	865.417
2010-01-29 08:10:00	8X	MERCEDES BENZ 416CDI/3550	100 Series	2007-09-12	870.34
2010-01-31 02:00:00	8X	MERCEDES BENZ 416CDI/3550	100 Series	2007-09-12	872.083
2010-04-30 09:25:00	8X	MERCEDES BENZ 416CDI/3550	100 Series	2007-09-12	961.392
2010-05-20 08:20:00	8X	MERCEDES BENZ 416CDI/3550	100 Series	2007-09-12	981.347
2011-04-12 08:45:00	8X	MERCEDES BENZ 416CDI/3550	100 Series	2007-09-12	1308.36
2011-05-12 17:30:00	8X	MERCEDES BENZ 416CDI/3550	100 Series	2007-09-12	1338.73
2012-02-04 08:00:00	8X	MERCEDES BENZ 416CDI/3550	100 Series	2007-09-12	1606.33
2012-02-26 08:30:00	8X	MERCEDES BENZ 416CDI/3550	100 Series	2007-09-12	1628.35
2012-06-28 17:30:00	8X	MERCEDES BENZ 416CDI/3550	100 Series	2007-09-12	1751.73
2012-08-16 09:00:00	8X	MERCEDES BENZ 416CDI/3550	100 Series	2007-09-12	1800.38
2012-10-11 10:00:00	8X	MERCEDES BENZ 416CDI/3550	100 Series	2007-09-12	1856.42
2012-10-18 10:20:00	8X	MERCEDES BENZ 416CDI/3550	100 Series	2007-09-12	1863.43
2012-12-07 08:20:00	8X	MERCEDES BENZ 416CDI/3550	100 Series	2007-09-12	1913.35
2013-01-10 14:00:00	8X	MERCEDES BENZ 416CDI/3550	100 Series	2007-09-12	1947.58
2013-01-18 14:00:00	8X	MERCEDES BENZ 416CDI/3550	100 Series	2007-09-12	1955.58
2013-03-01	8X	MERCEDES BENZ 416CDI/3550	100 Series	2007-09-12	1997
2009-01-01	9T	MERCEDES BENZ 416CDI/3550	100 Series	2007-09-15	474
2009-03-18 16:10:00	9T	MERCEDES BENZ 416CDI/3550	100 Series	2007-09-15	550.674
2009-03-29 09:00:00	9T	MERCEDES BENZ 416CDI/3550	100 Series	2007-09-15	561.375
2009-08-20 17:00:00	9T	MERCEDES BENZ 416CDI/3550	100 Series	2007-09-15	705.708
2010-08-11 13:00:00	9T	MERCEDES BENZ 416CDI/3550	100 Series	2007-09-15	1061.54
2010-11-25 08:00:00	9T	MERCEDES BENZ 416CDI/3550	100 Series	2007-09-15	1167.33
2010-12-13 08:08:00	9T	MERCEDES BENZ 416CDI/3550	100 Series	2007-09-15	1185.34
2011-05-04 07:30:00	9T	MERCEDES BENZ 416CDI/3550	100 Series	2007-09-15	1327.31
2012-11-08 07:30:00	9T	MERCEDES BENZ 416CDI/3550	100 Series	2007-09-15	1881.31
2012-11-13 13:30:00	9T	MERCEDES BENZ 416CDI/3550	100 Series	2007-09-15	1886.56
2012-11-19 20:40:00	9T	MERCEDES BENZ 416CDI/3550	100 Series	2007-09-15	1892.86
2013-03-01	9T	MERCEDES BENZ 416CDI/3550	100 Series	2007-09-15	1994
2009-01-01	8S	MERCEDES BENZ 416CDI/3550	100 Series	2007-09-20	469
2009-03-19 10:30:00	8S	MERCEDES BENZ 416CDI/3550	100 Series	2007-09-20	546.438
2009-04-10 10:00:00	8S	MERCEDES BENZ 416CDI/3550	100 Series	2007-09-20	568.417
2009-04-13 17:00:00	8S	MERCEDES BENZ 416CDI/3550	100 Series	2007-09-20	571.708
2009-05-16 22:30:00	8S	MERCEDES BENZ 416CDI/3550	100 Series	2007-09-20	604.938
2009-05-29 11:25:00	8S	MERCEDES BENZ 416CDI/3550	100 Series	2007-09-20	617.476
2009-07-10 09:45:00	8S	MERCEDES BENZ 416CDI/3550	100 Series	2007-09-20	659.406
2009-09-04 10:30:00	8S	MERCEDES BENZ 416CDI/3550	100 Series	2007-09-20	715.438
2009-11-04 17:25:00	8S	MERCEDES BENZ 416CDI/3550	100 Series	2007-09-20	776.726
2009-11-11 09:15:00	8S	MERCEDES BENZ 416CDI/3550	100 Series	2007-09-20	783.385
2010-04-13 14:00:00	8S	MERCEDES BENZ 416CDI/3550	100 Series	2007-09-20	936.583
2010-06-10 10:20:00	8S	MERCEDES BENZ 416CDI/3550	100 Series	2007-09-20	994.431
2010-08-20 14:00:00	8S	MERCEDES BENZ 416CDI/3550	100 Series	2007-09-20	1065.58
2010-10-08 16:00:00	8S	MERCEDES BENZ 416CDI/3550	100 Series	2007-09-20	1114.67
2010-12-07 14:10:00	8S	MERCEDES BENZ 416CDI/3550	100 Series	2007-09-20	1174.59
2011-03-22 11:00:00	8S	MERCEDES BENZ 416CDI/3550	100 Series	2007-09-20	1279.46
2011-04-18 09:00:00	8S	MERCEDES BENZ 416CDI/3550	100 Series	2007-09-20	1306.38
2011-06-07 19:20:00	8S	MERCEDES BENZ 416CDI/3550	100 Series	2007-09-20	1356.81
2011-06-08 08:00:00	8S	MERCEDES BENZ 416CDI/3550	100 Series	2007-09-20	1357.33
2012-06-25 09:00:00	8S	MERCEDES BENZ 416CDI/3550	100 Series	2007-09-20	1740.38
2012-09-02 17:45:00	8S	MERCEDES BENZ 416CDI/3550	100 Series	2007-09-20	1809.74
2012-09-07 10:30:00	8S	MERCEDES BENZ 416CDI/3550	100 Series	2007-09-20	1814.44
2012-10-30 08:00:00	8S	MERCEDES BENZ 416CDI/3550	100 Series	2007-09-20	1867.33
2012-12-28 19:30:00	8S	MERCEDES BENZ 416CDI/3550	100 Series	2007-09-20	1926.81
2013-01-11 18:00:00	8S	MERCEDES BENZ 416CDI/3550	100 Series	2007-09-20	1940.75
2013-01-26 13:30:00	8S	MERCEDES BENZ 416CDI/3550	100 Series	2007-09-20	1955.56
2013-03-01	8S	MERCEDES BENZ 416CDI/3550	100 Series	2007-09-20	1989
2009-01-01	9P	MERCEDES BENZ 416CDI/3550	100 Series	2007-09-21	468
2009-02-07 12:30:00	9P	MERCEDES BENZ 416CDI/3550	100 Series	2007-09-21	505.521
2009-02-10 07:50:00	9P	MERCEDES BENZ 416CDI/3550	100 Series	2007-09-21	508.326
2009-02-24 23:55:00	9P	MERCEDES BENZ 416CDI/3550	100 Series	2007-09-21	522.997
2009-03-07 00:10:00	9P	MERCEDES BENZ 416CDI/3550	100 Series	2007-09-21	533.007
2009-03-29 09:00:00	9P	MERCEDES BENZ 416CDI/3550	100 Series	2007-09-21	555.375
2009-04-27 09:45:00	9P	MERCEDES BENZ 416CDI/3550	100 Series	2007-09-21	584.406
2009-05-21 11:15:00	9P	MERCEDES BENZ 416CDI/3550	100 Series	2007-09-21	608.469
2009-07-02 12:30:00	9P	MERCEDES BENZ 416CDI/3550	100 Series	2007-09-21	650.521
2009-07-26 08:20:00	9P	MERCEDES BENZ 416CDI/3550	100 Series	2007-09-21	674.347
2009-09-17 07:35:00	9P	MERCEDES BENZ 416CDI/3550	100 Series	2007-09-21	727.316
2009-12-18 21:05:00	9P	MERCEDES BENZ 416CDI/3550	100 Series	2007-09-21	819.878
2010-01-09 08:40:00	9P	MERCEDES BENZ 416CDI/3550	100 Series	2007-09-21	841.361
2010-03-23 08:25:00	9P	MERCEDES BENZ 416CDI/3550	100 Series	2007-09-21	914.351
2010-04-08 20:45:00	9P	MERCEDES BENZ 416CDI/3550	100 Series	2007-09-21	930.865
2010-04-28 10:25:00	9P	MERCEDES BENZ 416CDI/3550	100 Series	2007-09-21	950.434
2010-05-05 17:30:00	9P	MERCEDES BENZ 416CDI/3550	100 Series	2007-09-21	957.729
2010-06-06 12:55:00	9P	MERCEDES BENZ 416CDI/3550	100 Series	2007-09-21	989.538
2010-06-29 17:40:00	9P	MERCEDES BENZ 416CDI/3550	100 Series	2007-09-21	1012.74
2010-09-01 04:58:00	9P	MERCEDES BENZ 416CDI/3550	100 Series	2007-09-21	1076.21
2010-10-05 04:55:00	9P	MERCEDES BENZ 416CDI/3550	100 Series	2007-09-21	1110.2
2011-01-18 23:30:00	9P	MERCEDES BENZ 416CDI/3550	100 Series	2007-09-21	1215.98
2011-01-31 10:00:00	9P	MERCEDES BENZ 416CDI/3550	100 Series	2007-09-21	1228.42
2012-10-11 13:30:00	9P	MERCEDES BENZ 416CDI/3550	100 Series	2007-09-21	1847.56
2012-11-29 08:30:00	9P	MERCEDES BENZ 416CDI/3550	100 Series	2007-09-21	1896.35
2013-03-01 23:30:00	9P	MERCEDES BENZ 416CDI/3550	100 Series	2007-09-21	1988.98
2009-01-01	0J	MERCEDES BENZ 416CDI/3550	100 Series	2007-09-25	464
2009-06-26 08:00:00	0J	MERCEDES BENZ 416CDI/3550	100 Series	2007-09-25	640.333
2009-07-04 01:00:00	0J	MERCEDES BENZ 416CDI/3550	100 Series	2007-09-25	648.042
2009-08-29 22:40:00	0J	MERCEDES BENZ 416CDI/3550	100 Series	2007-09-25	704.944
2010-01-25 22:30:00	0J	MERCEDES BENZ 416CDI/3550	100 Series	2007-09-25	853.938
2010-02-19 11:00:00	0J	MERCEDES BENZ 416CDI/3550	100 Series	2007-09-25	878.458
2010-02-22 21:00:00	0J	MERCEDES BENZ 416CDI/3550	100 Series	2007-09-25	881.875
2010-04-20 08:10:00	0J	MERCEDES BENZ 416CDI/3550	100 Series	2007-09-25	938.34
2010-04-23	0J	MERCEDES BENZ 416CDI/3550	100 Series	2007-09-25	941
2010-06-30 08:30:00	0J	MERCEDES BENZ 416CDI/3550	100 Series	2007-09-25	1009.35
2010-07-28 07:30:00	0J	MERCEDES BENZ 416CDI/3550	100 Series	2007-09-25	1037.31
2011-02-06 08:45:00	0J	MERCEDES BENZ 416CDI/3550	100 Series	2007-09-25	1230.36
2011-06-07 06:00:00	0J	MERCEDES BENZ 416CDI/3550	100 Series	2007-09-25	1351.25
2011-11-06 06:40:00	0J	MERCEDES BENZ 416CDI/3550	100 Series	2007-09-25	1503.28
2012-05-29 10:15:00	0J	MERCEDES BENZ 416CDI/3550	100 Series	2007-09-25	1708.43
2013-03-01	0J	MERCEDES BENZ 416CDI/3550	100 Series	2007-09-25	1984
2009-01-01	1G	MERCEDES BENZ 416CDI/3550	100 Series	2007-09-29	460
2009-05-18 07:40:00	1G	MERCEDES BENZ 416CDI/3550	100 Series	2007-09-29	597.319
2009-07-01 10:00:00	1G	MERCEDES BENZ 416CDI/3550	100 Series	2007-09-29	641.417
2009-07-03 22:00:00	1G	MERCEDES BENZ 416CDI/3550	100 Series	2007-09-29	643.917
2009-08-01 08:00:00	1G	MERCEDES BENZ 416CDI/3550	100 Series	2007-09-29	672.333
2009-08-30 13:20:00	1G	MERCEDES BENZ 416CDI/3550	100 Series	2007-09-29	701.556
2009-10-22 21:13:00	1G	MERCEDES BENZ 416CDI/3550	100 Series	2007-09-29	754.884
2009-11-18 19:45:00	1G	MERCEDES BENZ 416CDI/3550	100 Series	2007-09-29	781.823
2009-12-01 21:20:00	1G	MERCEDES BENZ 416CDI/3550	100 Series	2007-09-29	794.889
2009-12-16 19:50:00	1G	MERCEDES BENZ 416CDI/3550	100 Series	2007-09-29	809.826
2010-03-03 17:30:00	1G	MERCEDES BENZ 416CDI/3550	100 Series	2007-09-29	886.729
2010-03-22 12:51:00	1G	MERCEDES BENZ 416CDI/3550	100 Series	2007-09-29	905.535
2010-03-27 20:50:00	1G	MERCEDES BENZ 416CDI/3550	100 Series	2007-09-29	910.868
2010-06-16 12:30:00	1G	MERCEDES BENZ 416CDI/3550	100 Series	2007-09-29	991.521
2010-08-20 15:15:00	1G	MERCEDES BENZ 416CDI/3550	100 Series	2007-09-29	1056.64
2011-05-06 08:30:00	1G	MERCEDES BENZ 416CDI/3550	100 Series	2007-09-29	1315.35
2011-06-20 10:30:00	1G	MERCEDES BENZ 416CDI/3550	100 Series	2007-09-29	1360.44
2011-10-09 16:30:00	1G	MERCEDES BENZ 416CDI/3550	100 Series	2007-09-29	1471.69
2011-11-19 12:00:00	1G	MERCEDES BENZ 416CDI/3550	100 Series	2007-09-29	1512.5
2012-05-10 08:30:00	1G	MERCEDES BENZ 416CDI/3550	100 Series	2007-09-29	1685.35
2013-03-01	1G	MERCEDES BENZ 416CDI/3550	100 Series	2007-09-29	1980
2009-01-01	2D	MERCEDES BENZ 416CDI/3550	100 Series	2007-09-26	463
2009-03-04 15:40:00	2D	MERCEDES BENZ 416CDI/3550	100 Series	2007-09-26	525.653
2009-06-03 10:30:00	2D	MERCEDES BENZ 416CDI/3550	100 Series	2007-09-27	615.438
2009-06-24 09:50:00	2D	MERCEDES BENZ 416CDI/3550	100 Series	2007-09-28	635.41
2009-07-01 06:35:00	2D	MERCEDES BENZ 416CDI/3550	100 Series	2007-09-29	641.274
2009-07-02 19:00:00	2D	MERCEDES BENZ 416CDI/3550	100 Series	2007-09-30	641.792
2009-08-21 17:30:00	2D	MERCEDES BENZ 416CDI/3550	100 Series	2007-10-01	690.729
2009-12-02 22:30:00	2D	MERCEDES BENZ 416CDI/3550	100 Series	2007-10-02	792.938
2009-12-25 03:00:00	2D	MERCEDES BENZ 416CDI/3550	100 Series	2007-10-03	814.125
2010-01-16 18:35:00	2D	MERCEDES BENZ 416CDI/3550	100 Series	2007-10-04	835.774
2010-02-01 21:30:00	2D	MERCEDES BENZ 416CDI/3550	100 Series	2007-10-05	850.896
2010-02-03 23:00:00	2D	MERCEDES BENZ 416CDI/3550	100 Series	2007-10-06	851.958
2010-03-27 08:15:00	2D	MERCEDES BENZ 416CDI/3550	100 Series	2007-10-07	902.344
2010-04-07 15:50:00	2D	MERCEDES BENZ 416CDI/3550	100 Series	2007-10-08	912.66
2010-04-19 18:00:00	2D	MERCEDES BENZ 416CDI/3550	100 Series	2007-10-09	923.75
2010-05-03 19:30:00	2D	MERCEDES BENZ 416CDI/3550	100 Series	2007-10-10	936.812
2010-06-06 21:05:00	2D	MERCEDES BENZ 416CDI/3550	100 Series	2007-10-11	969.878
2010-08-06 12:30:00	2D	MERCEDES BENZ 416CDI/3550	100 Series	2007-10-12	1029.52
2010-10-01 14:30:00	2D	MERCEDES BENZ 416CDI/3550	100 Series	2007-10-13	1084.6
2010-11-19 12:00:00	2D	MERCEDES BENZ 416CDI/3550	100 Series	2007-10-14	1132.5
2010-12-22 06:30:00	2D	MERCEDES BENZ 416CDI/3550	100 Series	2007-10-15	1164.27
2011-02-13 23:00:00	2D	MERCEDES BENZ 416CDI/3550	100 Series	2007-10-16	1216.96
2011-02-17 12:00:00	2D	MERCEDES BENZ 416CDI/3550	100 Series	2007-10-17	1219.5
2011-03-08 12:00:00	2D	MERCEDES BENZ 416CDI/3550	100 Series	2007-10-18	1237.5
2011-05-10 20:30:00	2D	MERCEDES BENZ 416CDI/3550	100 Series	2007-10-19	1299.85
2011-06-30 20:15:00	2D	MERCEDES BENZ 416CDI/3550	100 Series	2007-10-20	1349.84
2011-07-01 23:20:00	2D	MERCEDES BENZ 416CDI/3550	100 Series	2007-10-21	1349.97
2012-03-27 07:00:00	2D	MERCEDES BENZ 416CDI/3550	100 Series	2007-10-22	1618.29
2012-04-03 22:30:00	2D	MERCEDES BENZ 416CDI/3550	100 Series	2007-10-23	1624.94
2012-07-30 00:30:00	2D	MERCEDES BENZ 416CDI/3550	100 Series	2007-10-24	1741.02
2012-08-26 07:30:00	2D	MERCEDES BENZ 416CDI/3550	100 Series	2007-10-25	1767.31
2012-09-01 01:30:00	2D	MERCEDES BENZ 416CDI/3550	100 Series	2007-10-26	1772.06
2013-03-01	2D	MERCEDES BENZ 416CDI/3550	100 Series	2007-09-26	1983
2009-01-01	6Z	MERCEDES BENZ 515CDI/3665	200 Series	2007-12-19	379
2009-03-03	6Z	MERCEDES BENZ 515CDI/3665	200 Series	2007-12-19	440
2009-03-05	6Z	MERCEDES BENZ 515CDI/3665	200 Series	2007-12-19	442
2009-06-20	6Z	MERCEDES BENZ 515CDI/3665	200 Series	2007-12-19	549
2009-07-06	6Z	MERCEDES BENZ 515CDI/3665	200 Series	2007-12-19	565
2009-08-29	6Z	MERCEDES BENZ 515CDI/3665	200 Series	2007-12-19	619
2009-10-09	6Z	MERCEDES BENZ 515CDI/3665	200 Series	2007-12-19	660
2009-12-03	6Z	MERCEDES BENZ 515CDI/3665	200 Series	2007-12-19	685
2010-01-11	6Z	MERCEDES BENZ 515CDI/3665	200 Series	2007-12-19	774
2010-03-11	6Z	MERCEDES BENZ 515CDI/3665	200 Series	2007-12-19	813
2010-03-18	6Z	MERCEDES BENZ 515CDI/3665	200 Series	2007-12-19	820
2010-04-09	6Z	MERCEDES BENZ 515CDI/3665	200 Series	2007-12-19	842
2010-06-01	6Z	MERCEDES BENZ 515CDI/3665	200 Series	2007-12-19	895
2010-06-28	6Z	MERCEDES BENZ 515CDI/3665	200 Series	2007-12-19	922
2010-08-17	6Z	MERCEDES BENZ 515CDI/3665	200 Series	2007-12-19	972
2010-10-12 11:30:00	6Z	MERCEDES BENZ 515CDI/3665	200 Series	2007-12-19	1028
2010-10-28 20:45:00	6Z	MERCEDES BENZ 515CDI/3665	200 Series	2007-12-19	1045
2011-02-08 16:00:00	6Z	MERCEDES BENZ 515CDI/3665	200 Series	2007-12-19	1148
2011-03-09 08:00:00	6Z	MERCEDES BENZ 515CDI/3665	200 Series	2007-12-19	1176
2011-04-08 11:15:00	6Z	MERCEDES BENZ 515CDI/3665	200 Series	2007-12-19	1206
2011-05-08 17:00:00	6Z	MERCEDES BENZ 515CDI/3665	200 Series	2007-12-19	1237
2011-06-13 12:20:00	6Z	MERCEDES BENZ 515CDI/3665	200 Series	2007-12-19	1273
2011-10-09 20:15:00	6Z	MERCEDES BENZ 515CDI/3665	200 Series	2007-12-19	1391
2011-11-11 13:50:00	6Z	MERCEDES BENZ 515CDI/3665	200 Series	2007-12-19	1424
2011-11-16 11:00:00	6Z	MERCEDES BENZ 515CDI/3665	200 Series	2007-12-19	1428
2011-11-21 11:00:00	6Z	MERCEDES BENZ 515CDI/3665	200 Series	2007-12-19	1433
2012-02-13 10:00:00	6Z	MERCEDES BENZ 515CDI/3665	200 Series	2007-12-19	1517
2012-04-06 08:30:00	6Z	MERCEDES BENZ 515CDI/3665	200 Series	2007-12-19	1570
2012-04-19 10:30:00	6Z	MERCEDES BENZ 515CDI/3665	200 Series	2007-12-19	1583
2012-06-21 12:00:00	6Z	MERCEDES BENZ 515CDI/3665	200 Series	2007-12-19	1647
2012-07-22 22:00:00	6Z	MERCEDES BENZ 515CDI/3665	200 Series	2007-12-19	1678
2012-09-22 17:30:00	6Z	MERCEDES BENZ 515CDI/3665	200 Series	2007-12-19	1740
2012-09-25 13:30:00	6Z	MERCEDES BENZ 515CDI/3665	200 Series	2007-12-19	1743
2012-10-08 23:20:00	6Z	MERCEDES BENZ 515CDI/3665	200 Series	2007-12-19	1756
2012-12-11 11:30:00	6Z	MERCEDES BENZ 515CDI/3665	200 Series	2007-12-19	1789
2013-02-16 14:00:00	6Z	MERCEDES BENZ 515CDI/3665	200 Series	2007-12-19	1887
2013-03-01 14:00:00	6Z	MERCEDES BENZ 515CDI/3665	200 Series	2007-12-19	1899.58
2009-01-01	9R	MERCEDES BENZ 515CDI/3665	200 Series	2008-01-17	350
2009-06-21	9R	MERCEDES BENZ 515CDI/3665	200 Series	2008-01-17	521
2009-07-14	9R	MERCEDES BENZ 515CDI/3665	200 Series	2008-01-17	544
2009-09-11	9R	MERCEDES BENZ 515CDI/3665	200 Series	2008-01-17	603
2010-01-27	9R	MERCEDES BENZ 515CDI/3665	200 Series	2008-01-17	751
2010-03-05	9R	MERCEDES BENZ 515CDI/3665	200 Series	2008-01-17	798
2010-04-28	9R	MERCEDES BENZ 515CDI/3665	200 Series	2008-01-17	832
2010-05-05	9R	MERCEDES BENZ 515CDI/3665	200 Series	2008-01-17	849
2010-05-08	9R	MERCEDES BENZ 515CDI/3665	200 Series	2008-01-17	862
2010-09-24 08:20:00	9R	MERCEDES BENZ 515CDI/3665	200 Series	2008-01-17	981.347
2010-10-26 10:00:00	9R	MERCEDES BENZ 515CDI/3665	200 Series	2008-01-17	1013.42
2011-02-16 18:00:00	9R	MERCEDES BENZ 515CDI/3665	200 Series	2008-01-17	1126.75
2011-06-06 14:30:00	9R	MERCEDES BENZ 515CDI/3665	200 Series	2008-01-17	1236.6
2011-06-14 22:50:00	9R	MERCEDES BENZ 515CDI/3665	200 Series	2008-01-17	1255
2011-06-22 09:00:00	9R	MERCEDES BENZ 515CDI/3665	200 Series	2008-01-17	1272
2011-06-24 06:00:00	9R	MERCEDES BENZ 515CDI/3665	200 Series	2008-01-17	1284
2011-07-27 09:00:00	9R	MERCEDES BENZ 515CDI/3665	200 Series	2008-01-17	1299
2013-03-01 14:00:00	9R	MERCEDES BENZ 515CDI/3665	200 Series	2008-01-17	1870.58
2009-01-01	1H	MERCEDES BENZ 515CDI/3665	200 Series	2008-01-23	344
2009-08-10	1H	MERCEDES BENZ 515CDI/3665	200 Series	2008-01-23	565
2009-10-20	1H	MERCEDES BENZ 515CDI/3665	200 Series	2008-01-23	636
2009-11-27	1H	MERCEDES BENZ 515CDI/3665	200 Series	2008-01-23	674
2009-12-16	1H	MERCEDES BENZ 515CDI/3665	200 Series	2008-01-23	693
2010-02-22	1H	MERCEDES BENZ 515CDI/3665	200 Series	2008-01-23	761
2010-04-04	1H	MERCEDES BENZ 515CDI/3665	200 Series	2008-01-23	802
2010-08-02	1H	MERCEDES BENZ 515CDI/3665	200 Series	2008-01-23	922
2010-08-04	1H	MERCEDES BENZ 515CDI/3665	200 Series	2008-01-23	924
2010-09-20 12:00:00	1H	MERCEDES BENZ 515CDI/3665	200 Series	2008-01-23	971.5
2010-10-09 11:20:00	1H	MERCEDES BENZ 515CDI/3665	200 Series	2008-01-23	990.472
2010-11-04 08:45:00	1H	MERCEDES BENZ 515CDI/3665	200 Series	2008-01-23	1016.36
2011-02-16 08:40:00	1H	MERCEDES BENZ 515CDI/3665	200 Series	2008-01-23	1120.36
2011-06-16 08:30:00	1H	MERCEDES BENZ 515CDI/3665	200 Series	2008-01-23	1240.35
2011-06-27 09:00:00	1H	MERCEDES BENZ 515CDI/3665	200 Series	2008-01-23	1251.38
2012-04-09 08:00:00	1H	MERCEDES BENZ 515CDI/3665	200 Series	2008-01-23	1538.33
2012-04-09 08:10:00	1H	MERCEDES BENZ 515CDI/3665	200 Series	2008-01-23	1538.34
2012-05-22 09:30:00	1H	MERCEDES BENZ 515CDI/3665	200 Series	2008-01-23	1581.4
2012-07-24 15:30:00	1H	MERCEDES BENZ 515CDI/3665	200 Series	2008-01-23	1644.65
2012-08-02 11:00:00	1H	MERCEDES BENZ 515CDI/3665	200 Series	2008-01-23	1653.46
2013-03-01 14:00:00	1H	MERCEDES BENZ 515CDI/3665	200 Series	2008-01-23	1864.58
2009-01-01	4A	MERCEDES BENZ 515CDI/3665	200 Series	2008-02-01	335
2010-03-03	4A	MERCEDES BENZ 515CDI/3665	200 Series	2008-02-01	761
2010-03-14	4A	MERCEDES BENZ 515CDI/3665	200 Series	2008-02-01	772
2010-03-15	4A	MERCEDES BENZ 515CDI/3665	200 Series	2008-02-01	783
2010-03-19	4A	MERCEDES BENZ 515CDI/3665	200 Series	2008-02-01	789
2010-03-22	4A	MERCEDES BENZ 515CDI/3665	200 Series	2008-02-01	806
2010-04-08	4A	MERCEDES BENZ 515CDI/3665	200 Series	2008-02-01	825
2010-04-25	4A	MERCEDES BENZ 515CDI/3665	200 Series	2008-02-01	854
2010-07-02	4A	MERCEDES BENZ 515CDI/3665	200 Series	2008-02-01	882
2010-08-26	4A	MERCEDES BENZ 515CDI/3665	200 Series	2008-02-01	927
2010-08-27	4A	MERCEDES BENZ 515CDI/3665	200 Series	2008-02-01	938
2010-09-16 08:00:00	4A	MERCEDES BENZ 515CDI/3665	200 Series	2008-02-01	949
2010-09-23 09:30:00	4A	MERCEDES BENZ 515CDI/3665	200 Series	2008-02-01	962
2010-10-03 23:30:00	4A	MERCEDES BENZ 515CDI/3665	200 Series	2008-02-01	976
2010-10-24 16:00:00	4A	MERCEDES BENZ 515CDI/3665	200 Series	2008-02-01	997
2010-11-09 19:00:00	4A	MERCEDES BENZ 515CDI/3665	200 Series	2008-02-01	1013
2010-11-22 08:50:00	4A	MERCEDES BENZ 515CDI/3665	200 Series	2008-02-01	1025
2011-01-23 09:30:00	4A	MERCEDES BENZ 515CDI/3665	200 Series	2008-02-01	1167
2011-02-07 14:00:00	4A	MERCEDES BENZ 515CDI/3665	200 Series	2008-02-01	1193
2011-04-18 11:00:00	4A	MERCEDES BENZ 515CDI/3665	200 Series	2008-02-01	1222
2011-05-17 07:40:00	4A	MERCEDES BENZ 515CDI/3665	200 Series	2008-02-01	1251
2011-06-19 14:00:00	4A	MERCEDES BENZ 515CDI/3665	200 Series	2008-02-01	1285
2011-10-18 08:00:00	4A	MERCEDES BENZ 515CDI/3665	200 Series	2008-02-01	1345
2011-10-27 20:30:00	4A	MERCEDES BENZ 515CDI/3665	200 Series	2008-02-01	1365
2011-11-25 00:50:00	4A	MERCEDES BENZ 515CDI/3665	200 Series	2008-02-01	1383
2012-04-20 14:30:00	4A	MERCEDES BENZ 515CDI/3665	200 Series	2008-02-01	1541
2012-05-31 22:30:00	4A	MERCEDES BENZ 515CDI/3665	200 Series	2008-02-01	1582
2012-06-10 11:30:00	4A	MERCEDES BENZ 515CDI/3665	200 Series	2008-02-01	1611
2013-03-01 10:00:00	4A	MERCEDES BENZ 515CDI/3665	200 Series	2008-02-01	1855.42
2009-01-01	5Y	MERCEDES BENZ 515CDI/3665	200 Series	2008-02-20	316
2009-09-03	5Y	MERCEDES BENZ 515CDI/3665	200 Series	2008-02-20	561
2009-12-01	5Y	MERCEDES BENZ 515CDI/3665	200 Series	2008-02-20	650
2009-12-03	5Y	MERCEDES BENZ 515CDI/3665	200 Series	2008-02-20	652
2010-01-07	5Y	MERCEDES BENZ 515CDI/3665	200 Series	2008-02-20	687
2010-01-09	5Y	MERCEDES BENZ 515CDI/3665	200 Series	2008-02-20	689
2010-01-21	5Y	MERCEDES BENZ 515CDI/3665	200 Series	2008-02-20	701
2010-03-17	5Y	MERCEDES BENZ 515CDI/3665	200 Series	2008-02-20	756
2010-04-24	5Y	MERCEDES BENZ 515CDI/3665	200 Series	2008-02-20	794
2010-04-30	5Y	MERCEDES BENZ 515CDI/3665	200 Series	2008-02-20	800
2010-05-03	5Y	MERCEDES BENZ 515CDI/3665	200 Series	2008-02-20	803
2010-09-12 13:00:00	5Y	MERCEDES BENZ 515CDI/3665	200 Series	2008-02-20	935.542
2010-10-07 11:30:00	5Y	MERCEDES BENZ 515CDI/3665	200 Series	2008-02-20	960.479
2011-02-04 21:00:00	5Y	MERCEDES BENZ 515CDI/3665	200 Series	2008-02-20	1080.88
2011-06-08 20:30:00	5Y	MERCEDES BENZ 515CDI/3665	200 Series	2008-02-20	1204.85
2011-06-18 21:30:00	5Y	MERCEDES BENZ 515CDI/3665	200 Series	2008-02-20	1214.9
2011-08-13 20:00:00	5Y	MERCEDES BENZ 515CDI/3665	200 Series	2008-02-20	1270.83
2012-01-12 20:30:00	5Y	MERCEDES BENZ 515CDI/3665	200 Series	2008-02-20	1422.85
2012-03-26 11:30:00	5Y	MERCEDES BENZ 515CDI/3665	200 Series	2008-02-20	1496.48
2012-05-05 09:30:00	5Y	MERCEDES BENZ 515CDI/3665	200 Series	2008-02-20	1536.4
2012-05-21 16:00:00	5Y	MERCEDES BENZ 515CDI/3665	200 Series	2008-02-20	1552.67
2012-05-21 16:00:00	5Y	MERCEDES BENZ 515CDI/3665	200 Series	2008-02-20	1552.67
2012-06-23 21:00:00	5Y	MERCEDES BENZ 515CDI/3665	200 Series	2008-02-20	1585.88
2012-09-19 11:30:00	5Y	MERCEDES BENZ 515CDI/3665	200 Series	2008-02-20	1673.48
2012-12-18 09:00:00	5Y	MERCEDES BENZ 515CDI/3665	200 Series	2008-02-20	1763.38
2013-01-03 14:15:00	5Y	MERCEDES BENZ 515CDI/3665	200 Series	2008-02-20	1779.59
2013-03-01	5Y	MERCEDES BENZ 515CDI/3665	200 Series	2008-02-20	1836
2009-01-01	6U	MERCEDES BENZ 515CDI/3665	200 Series	2008-02-20	316
2009-02-19	6U	MERCEDES BENZ 515CDI/3665	200 Series	2008-02-20	395
2009-05-13	6U	MERCEDES BENZ 515CDI/3665	200 Series	2008-02-20	448
2009-11-18	6U	MERCEDES BENZ 515CDI/3665	200 Series	2008-02-20	637
2010-04-11	6U	MERCEDES BENZ 515CDI/3665	200 Series	2008-02-20	781
2010-05-23	6U	MERCEDES BENZ 515CDI/3665	200 Series	2008-02-20	823
2010-06-27	6U	MERCEDES BENZ 515CDI/3665	200 Series	2008-02-20	858
2010-07-28	6U	MERCEDES BENZ 515CDI/3665	200 Series	2008-02-20	889
2010-07-30	6U	MERCEDES BENZ 515CDI/3665	200 Series	2008-02-20	891
2010-10-01 20:00:00	6U	MERCEDES BENZ 515CDI/3665	200 Series	2008-02-20	954.833
2010-10-24 15:00:00	6U	MERCEDES BENZ 515CDI/3665	200 Series	2008-02-20	977.625
2010-11-13 18:00:00	6U	MERCEDES BENZ 515CDI/3665	200 Series	2008-02-20	997.75
2010-11-18 23:00:00	6U	MERCEDES BENZ 515CDI/3665	200 Series	2008-02-20	1002.96
2011-05-13 19:00:00	6U	MERCEDES BENZ 515CDI/3665	200 Series	2008-02-20	1178.79
2012-04-05 10:30:00	6U	MERCEDES BENZ 515CDI/3665	200 Series	2008-02-20	1506.44
2012-04-10 11:30:00	6U	MERCEDES BENZ 515CDI/3665	200 Series	2008-02-20	1511.48
2012-04-10 11:30:00	6U	MERCEDES BENZ 515CDI/3665	200 Series	2008-02-20	1511.48
2012-08-22 22:45:00	6U	MERCEDES BENZ 515CDI/3665	200 Series	2008-02-20	1645.95
2012-10-30 09:00:00	6U	MERCEDES BENZ 515CDI/3665	200 Series	2008-02-20	1714.38
2012-11-17 21:00:00	6U	MERCEDES BENZ 515CDI/3665	200 Series	2008-02-20	1732.88
2012-11-29 07:40:00	6U	MERCEDES BENZ 515CDI/3665	200 Series	2008-02-20	1744.32
2012-12-04 12:00:00	6U	MERCEDES BENZ 515CDI/3665	200 Series	2008-02-20	1749.5
2013-01-18 06:50:00	6U	MERCEDES BENZ 515CDI/3665	200 Series	2008-02-20	1794.28
2013-01-30 10:00:00	6U	MERCEDES BENZ 515CDI/3665	200 Series	2008-02-20	1806.42
2013-02-04 08:00:00	6U	MERCEDES BENZ 515CDI/3665	200 Series	2008-02-20	1811.33
2013-03-01	6U	MERCEDES BENZ 515CDI/3665	200 Series	2008-02-20	1836
2009-01-01	8P	MERCEDES BENZ 515CDI/3665	200 Series	2008-02-26	310
2009-06-22	8P	MERCEDES BENZ 515CDI/3665	200 Series	2008-02-26	482
2009-08-18	8P	MERCEDES BENZ 515CDI/3665	200 Series	2008-02-26	539
2009-09-10	8P	MERCEDES BENZ 515CDI/3665	200 Series	2008-02-26	562
2009-09-23	8P	MERCEDES BENZ 515CDI/3665	200 Series	2008-02-26	575
2009-10-19	8P	MERCEDES BENZ 515CDI/3665	200 Series	2008-02-26	601
2010-05-03	8P	MERCEDES BENZ 515CDI/3665	200 Series	2008-02-26	797
2010-06-03	8P	MERCEDES BENZ 515CDI/3665	200 Series	2008-02-26	828
2010-08-08	8P	MERCEDES BENZ 515CDI/3665	200 Series	2008-02-26	894
2010-12-07 09:30:00	8P	MERCEDES BENZ 515CDI/3665	200 Series	2008-02-26	1015.4
2010-12-27 08:30:00	8P	MERCEDES BENZ 515CDI/3665	200 Series	2008-02-26	1035.35
2011-01-01 07:00:00	8P	MERCEDES BENZ 515CDI/3665	200 Series	2008-02-26	1040.29
2011-01-08 13:10:00	8P	MERCEDES BENZ 515CDI/3665	200 Series	2008-02-26	1047.55
2011-02-22 22:10:00	8P	MERCEDES BENZ 515CDI/3665	200 Series	2008-02-26	1092.92
2011-03-24 21:20:00	8P	MERCEDES BENZ 515CDI/3665	200 Series	2008-02-26	1122.89
2011-06-09 02:45:00	8P	MERCEDES BENZ 515CDI/3665	200 Series	2008-02-26	1199.11
2011-07-20 21:30:00	8P	MERCEDES BENZ 515CDI/3665	200 Series	2008-02-26	1240.9
2011-11-19 07:50:00	8P	MERCEDES BENZ 515CDI/3665	200 Series	2008-02-26	1362.33
2011-12-24 07:20:00	8P	MERCEDES BENZ 515CDI/3665	200 Series	2008-02-26	1397.31
2012-06-18 18:30:00	8P	MERCEDES BENZ 515CDI/3665	200 Series	2008-02-26	1574.77
2012-08-24 22:40:00	8P	MERCEDES BENZ 515CDI/3665	200 Series	2008-02-26	1641.94
2012-11-01 08:00:00	8P	MERCEDES BENZ 515CDI/3665	200 Series	2008-02-26	1710.33
2012-11-15	8P	MERCEDES BENZ 515CDI/3665	200 Series	2008-02-26	1724
2013-03-01	8P	MERCEDES BENZ 515CDI/3665	200 Series	2008-02-26	1830
2009-01-01	9L	MERCEDES BENZ 515CDI/3665	200 Series	2008-02-26	310
2009-01-02	9L	MERCEDES BENZ 515CDI/3665	200 Series	2008-02-26	311
2009-06-19	9L	MERCEDES BENZ 515CDI/3665	200 Series	2008-02-26	479
2009-06-20	9L	MERCEDES BENZ 515CDI/3665	200 Series	2008-02-26	480
2009-10-17	9L	MERCEDES BENZ 515CDI/3665	200 Series	2008-02-26	599
2010-01-11	9L	MERCEDES BENZ 515CDI/3665	200 Series	2008-02-26	685
2010-01-24	9L	MERCEDES BENZ 515CDI/3665	200 Series	2008-02-26	698
2010-04-17	9L	MERCEDES BENZ 515CDI/3665	200 Series	2008-02-26	781
2010-05-18	9L	MERCEDES BENZ 515CDI/3665	200 Series	2008-02-26	812
2010-06-14	9L	MERCEDES BENZ 515CDI/3665	200 Series	2008-02-26	839
2010-06-23	9L	MERCEDES BENZ 515CDI/3665	200 Series	2008-02-26	848
2010-07-07	9L	MERCEDES BENZ 515CDI/3665	200 Series	2008-02-26	862
2010-07-13	9L	MERCEDES BENZ 515CDI/3665	200 Series	2008-02-26	868
2010-09-06 10:45:00	9L	MERCEDES BENZ 515CDI/3665	200 Series	2008-02-26	923.448
2011-07-16 18:30:00	9L	MERCEDES BENZ 515CDI/3665	200 Series	2008-02-26	1236.77
2012-01-12 21:00:00	9L	MERCEDES BENZ 515CDI/3665	200 Series	2008-02-26	1416.88
2012-01-16 09:00:00	9L	MERCEDES BENZ 515CDI/3665	200 Series	2008-02-26	1420.38
2012-02-16 19:45:00	9L	MERCEDES BENZ 515CDI/3665	200 Series	2008-02-26	1451.82
2012-03-20 09:00:00	9L	MERCEDES BENZ 515CDI/3665	200 Series	2008-02-26	1484.38
2012-11-13 23:30:00	9L	MERCEDES BENZ 515CDI/3665	200 Series	2008-02-26	1722.98
2012-12-06 10:45:00	9L	MERCEDES BENZ 515CDI/3665	200 Series	2008-02-26	1745.45
2012-12-14 19:00:00	9L	MERCEDES BENZ 515CDI/3665	200 Series	2008-02-26	1753.79
2013-01-22 19:45:00	9L	MERCEDES BENZ 515CDI/3665	200 Series	2008-02-26	1792.82
2013-01-28 17:30:00	9L	MERCEDES BENZ 515CDI/3665	200 Series	2008-02-26	1798.73
2013-03-01	9L	MERCEDES BENZ 515CDI/3665	200 Series	2008-02-26	1830
2009-01-01	9H	MERCEDES BENZ 515CDI/3665	200 Series	2008-03-10	297
2009-03-03	9H	MERCEDES BENZ 515CDI/3665	200 Series	2008-03-10	348
2009-08-27	9H	MERCEDES BENZ 515CDI/3665	200 Series	2008-03-10	455
2009-09-23	9H	MERCEDES BENZ 515CDI/3665	200 Series	2008-03-10	482
2009-09-29	9H	MERCEDES BENZ 515CDI/3665	200 Series	2008-03-10	508
2009-12-14	9H	MERCEDES BENZ 515CDI/3665	200 Series	2008-03-10	544
2010-02-01	9H	MERCEDES BENZ 515CDI/3665	200 Series	2008-03-10	593
2010-02-22	9H	MERCEDES BENZ 515CDI/3665	200 Series	2008-03-10	624
2010-03-20	9H	MERCEDES BENZ 515CDI/3665	200 Series	2008-03-10	680
2010-04-13	9H	MERCEDES BENZ 515CDI/3665	200 Series	2008-03-10	884
2010-05-06	9H	MERCEDES BENZ 515CDI/3665	200 Series	2008-03-10	707
2010-05-14	9H	MERCEDES BENZ 515CDI/3665	200 Series	2008-03-10	715
2011-05-29 11:40:00	9H	MERCEDES BENZ 515CDI/3665	200 Series	2008-03-10	1175
2011-07-03 21:30:00	9H	MERCEDES BENZ 515CDI/3665	200 Series	2008-03-10	1211
2011-07-29 20:30:00	9H	MERCEDES BENZ 515CDI/3665	200 Series	2008-03-10	1237
2011-10-28 15:00:00	9H	MERCEDES BENZ 515CDI/3665	200 Series	2008-03-10	1328
2012-01-15 11:30:00	9H	MERCEDES BENZ 515CDI/3665	200 Series	2008-03-10	1406
2012-01-23 13:00:00	9H	MERCEDES BENZ 515CDI/3665	200 Series	2008-03-10	1415
2012-04-24 11:00:00	9H	MERCEDES BENZ 515CDI/3665	200 Series	2008-03-10	1506
2012-04-27 19:30:00	9H	MERCEDES BENZ 515CDI/3665	200 Series	2008-03-10	1510
2013-01-02 19:30:00	9H	MERCEDES BENZ 515CDI/3665	200 Series	2008-03-10	1760
2013-03-01	9H	MERCEDES BENZ 515CDI/3665	200 Series	2008-03-10	1817
2009-01-01	1J	MERCEDES BENZ 515CDI/3665	200 Series	2008-03-19	288
2009-10-20	1J	MERCEDES BENZ 515CDI/3665	200 Series	2008-03-19	580
2009-11-09	1J	MERCEDES BENZ 515CDI/3665	200 Series	2008-03-19	600
2009-11-27	1J	MERCEDES BENZ 515CDI/3665	200 Series	2008-03-19	618
2010-01-12	1J	MERCEDES BENZ 515CDI/3665	200 Series	2008-03-19	664
2010-02-15	1J	MERCEDES BENZ 515CDI/3665	200 Series	2008-03-19	698
2010-02-20	1J	MERCEDES BENZ 515CDI/3665	200 Series	2008-03-19	703
2010-05-05	1J	MERCEDES BENZ 515CDI/3665	200 Series	2008-03-19	777
2010-06-06	1J	MERCEDES BENZ 515CDI/3665	200 Series	2008-03-19	809
2010-09-04 23:12:00	1J	MERCEDES BENZ 515CDI/3665	200 Series	2008-03-19	900
2011-01-14 00:15:00	1J	MERCEDES BENZ 515CDI/3665	200 Series	2008-03-19	1031
2011-02-11 21:00:00	1J	MERCEDES BENZ 515CDI/3665	200 Series	2008-03-19	1060
2011-02-18 12:34:00	1J	MERCEDES BENZ 515CDI/3665	200 Series	2008-03-19	1067
2011-02-28 05:15:00	1J	MERCEDES BENZ 515CDI/3665	200 Series	2008-03-19	1076
2011-05-16 08:30:00	1J	MERCEDES BENZ 515CDI/3665	200 Series	2008-03-19	1153
2011-06-21 08:00:00	1J	MERCEDES BENZ 515CDI/3665	200 Series	2008-03-19	1189
2011-10-04 09:35:00	1J	MERCEDES BENZ 515CDI/3665	200 Series	2008-03-19	1294
2011-10-18 16:00:00	1J	MERCEDES BENZ 515CDI/3665	200 Series	2008-03-19	1309
2011-11-16 08:00:00	1J	MERCEDES BENZ 515CDI/3665	200 Series	2008-03-19	1337
2012-02-20 09:00:00	1J	MERCEDES BENZ 515CDI/3665	200 Series	2008-03-19	1433
2012-04-26 22:00:00	1J	MERCEDES BENZ 515CDI/3665	200 Series	2008-03-19	1500
2012-05-27 12:00:00	1J	MERCEDES BENZ 515CDI/3665	200 Series	2008-03-19	1531
2012-11-20 18:20:00	1J	MERCEDES BENZ 515CDI/3665	200 Series	2008-03-19	1708
2012-11-30 09:00:00	1J	MERCEDES BENZ 515CDI/3665	200 Series	2008-03-19	1717
2012-12-01 20:45:00	1J	MERCEDES BENZ 515CDI/3665	200 Series	2008-03-19	1719
2013-03-01	1J	MERCEDES BENZ 515CDI/3665	200 Series	2008-03-19	1808
2009-01-01	3J	MERCEDES BENZ 515CDI/3665	200 Series	2008-03-31	276
2009-08-11	3J	MERCEDES BENZ 515CDI/3665	200 Series	2008-03-31	498
2009-10-12	3J	MERCEDES BENZ 515CDI/3665	200 Series	2008-03-31	560
2009-10-12	3J	MERCEDES BENZ 515CDI/3665	200 Series	2008-03-31	560
2009-12-12	3J	MERCEDES BENZ 515CDI/3665	200 Series	2008-03-31	621
2009-12-28	3J	MERCEDES BENZ 515CDI/3665	200 Series	2008-03-31	637
2010-02-21	3J	MERCEDES BENZ 515CDI/3665	200 Series	2008-03-31	692
2010-03-13	3J	MERCEDES BENZ 515CDI/3665	200 Series	2008-03-31	712
2010-04-20	3J	MERCEDES BENZ 515CDI/3665	200 Series	2008-03-31	740
2010-05-05	3J	MERCEDES BENZ 515CDI/3665	200 Series	2008-03-31	765
2010-05-29	3J	MERCEDES BENZ 515CDI/3665	200 Series	2008-03-31	789
2010-06-30	3J	MERCEDES BENZ 515CDI/3665	200 Series	2008-03-31	821
2010-08-01	3J	MERCEDES BENZ 515CDI/3665	200 Series	2008-03-31	853
2010-12-19 23:50:00	3J	MERCEDES BENZ 515CDI/3665	200 Series	2008-03-31	994
2011-01-09 10:00:00	3J	MERCEDES BENZ 515CDI/3665	200 Series	2008-03-31	1014
2011-01-10 03:00:00	3J	MERCEDES BENZ 515CDI/3665	200 Series	2008-03-31	1015
2011-04-23 11:30:00	3J	MERCEDES BENZ 515CDI/3665	200 Series	2008-03-31	1118
2011-05-31 16:30:00	3J	MERCEDES BENZ 515CDI/3665	200 Series	2008-03-31	1157
2011-11-19 22:00:00	3J	MERCEDES BENZ 515CDI/3665	200 Series	2008-03-31	1329
2012-01-20 11:00:00	3J	MERCEDES BENZ 515CDI/3665	200 Series	2008-03-31	1390
2012-04-22 01:20:00	3J	MERCEDES BENZ 515CDI/3665	200 Series	2008-03-31	1483
2012-05-01 19:00:00	3J	MERCEDES BENZ 515CDI/3665	200 Series	2008-03-31	1493
2012-05-16 15:45:00	3J	MERCEDES BENZ 515CDI/3665	200 Series	2008-03-31	1508
2012-06-08 08:00:00	3J	MERCEDES BENZ 515CDI/3665	200 Series	2008-03-31	1530
2012-07-24 15:00:00	3J	MERCEDES BENZ 515CDI/3665	200 Series	2008-03-31	1577
2012-09-11 09:00:00	3J	MERCEDES BENZ 515CDI/3665	200 Series	2008-03-31	1625
2012-09-21 09:00:00	3J	MERCEDES BENZ 515CDI/3665	200 Series	2008-03-31	1635
2012-11-26 16:00:00	3J	MERCEDES BENZ 515CDI/3665	200 Series	2008-03-31	1702
2012-12-26 01:30:00	3J	MERCEDES BENZ 515CDI/3665	200 Series	2008-03-31	1731
2013-03-01	3J	MERCEDES BENZ 515CDI/3665	200 Series	2008-03-31	1796
2009-01-01	2H	MERCEDES BENZ 515CDI/3665	200 Series	2008-04-02	274
2009-08-06	2H	MERCEDES BENZ 515CDI/3665	200 Series	2008-04-02	491
2009-09-25	2H	MERCEDES BENZ 515CDI/3665	200 Series	2008-04-02	541
2010-02-26	2H	MERCEDES BENZ 515CDI/3665	200 Series	2008-04-02	695
2010-04-08	2H	MERCEDES BENZ 515CDI/3665	200 Series	2008-04-02	736
2010-05-17	2H	MERCEDES BENZ 515CDI/3665	200 Series	2008-04-02	775
2010-07-21	2H	MERCEDES BENZ 515CDI/3665	200 Series	2008-04-02	840
2010-11-27 14:45:00	2H	MERCEDES BENZ 515CDI/3665	200 Series	2008-04-02	969.615
2010-12-21 17:25:00	2H	MERCEDES BENZ 515CDI/3665	200 Series	2008-04-02	993.726
2011-02-15 22:48:00	2H	MERCEDES BENZ 515CDI/3665	200 Series	2008-04-02	1049.95
2011-04-25 11:30:00	2H	MERCEDES BENZ 515CDI/3665	200 Series	2008-04-02	1118.48
2011-06-09 13:40:00	2H	MERCEDES BENZ 515CDI/3665	200 Series	2008-04-02	1163.57
2011-07-09 10:20:00	2H	MERCEDES BENZ 515CDI/3665	200 Series	2008-04-02	1193.43
2012-02-05 21:00:00	2H	MERCEDES BENZ 515CDI/3665	200 Series	2008-04-02	1404.88
2012-02-24 12:00:00	2H	MERCEDES BENZ 515CDI/3665	200 Series	2008-04-02	1423.5
2012-08-03 20:30:00	2H	MERCEDES BENZ 515CDI/3665	200 Series	2008-04-02	1584.85
2012-09-28 09:00:00	2H	MERCEDES BENZ 515CDI/3665	200 Series	2008-04-02	1640.38
2012-09-30 14:00:00	2H	MERCEDES BENZ 515CDI/3665	200 Series	2008-04-02	1642.58
2012-10-28 02:15:00	2H	MERCEDES BENZ 515CDI/3665	200 Series	2008-04-02	1670.09
2013-01-17 10:00:00	2H	MERCEDES BENZ 515CDI/3665	200 Series	2008-04-02	1751.42
2013-01-26 13:00:00	2H	MERCEDES BENZ 515CDI/3665	200 Series	2008-04-02	1760.54
2013-02-16 10:00:00	2H	MERCEDES BENZ 515CDI/3665	200 Series	2008-04-02	1781.42
2013-03-01	2H	MERCEDES BENZ 515CDI/3665	200 Series	2008-04-02	1794
2009-01-01	3E	MERCEDES BENZ 515CDI/3665	200 Series	2008-04-09	267
2009-09-21 08:15:00	3E	MERCEDES BENZ 515CDI/3665	200 Series	2008-04-09	530.344
2009-11-25 14:30:00	3E	MERCEDES BENZ 515CDI/3665	200 Series	2008-04-09	595.604
2010-04-03 08:18:00	3E	MERCEDES BENZ 515CDI/3665	200 Series	2008-04-09	724.346
2010-05-18 14:50:00	3E	MERCEDES BENZ 515CDI/3665	200 Series	2008-04-09	769.618
2010-08-07 07:30:00	3E	MERCEDES BENZ 515CDI/3665	200 Series	2008-04-09	850.312
2010-12-06 11:45:00	3E	MERCEDES BENZ 515CDI/3665	200 Series	2008-04-09	971.49
2011-04-16 08:40:00	3E	MERCEDES BENZ 515CDI/3665	200 Series	2008-04-09	1102.36
2011-05-07 15:10:00	3E	MERCEDES BENZ 515CDI/3665	200 Series	2008-04-09	1123.63
2011-06-16 13:30:00	3E	MERCEDES BENZ 515CDI/3665	200 Series	2008-04-09	1163.56
2011-07-01 23:45:00	3E	MERCEDES BENZ 515CDI/3665	200 Series	2008-04-09	1178.99
2011-10-03 12:30:00	3E	MERCEDES BENZ 515CDI/3665	200 Series	2008-04-09	1272.52
2012-04-07 16:00:00	3E	MERCEDES BENZ 515CDI/3665	200 Series	2008-04-09	1459.67
2012-05-10 11:30:00	3E	MERCEDES BENZ 515CDI/3665	200 Series	2008-04-09	1492.48
2012-06-08 10:40:00	3E	MERCEDES BENZ 515CDI/3665	200 Series	2008-04-09	1521.44
2012-06-13 10:00:00	3E	MERCEDES BENZ 515CDI/3665	200 Series	2008-04-09	1526.42
2012-06-23 08:00:00	3E	MERCEDES BENZ 515CDI/3665	200 Series	2008-04-09	1536.33
2012-12-23 13:00:00	3E	MERCEDES BENZ 515CDI/3665	200 Series	2008-04-09	1719.54
2013-03-01	3E	MERCEDES BENZ 515CDI/3665	200 Series	2008-04-09	1787
2009-01-01	4C	MERCEDES BENZ 515CDI/3665	200 Series	2008-04-15	261
2009-06-03	4C	MERCEDES BENZ 515CDI/3665	200 Series	2008-04-15	414
2009-10-09	4C	MERCEDES BENZ 515CDI/3665	200 Series	2008-04-15	542
2009-11-28	4C	MERCEDES BENZ 515CDI/3665	200 Series	2008-04-15	592
2009-11-30	4C	MERCEDES BENZ 515CDI/3665	200 Series	2008-04-15	594
2009-12-02	4C	MERCEDES BENZ 515CDI/3665	200 Series	2008-04-15	596
2010-02-17	4C	MERCEDES BENZ 515CDI/3665	200 Series	2008-04-15	673
2010-03-03	4C	MERCEDES BENZ 515CDI/3665	200 Series	2008-04-15	687
2010-04-13	4C	MERCEDES BENZ 515CDI/3665	200 Series	2008-04-15	728
2010-04-19	4C	MERCEDES BENZ 515CDI/3665	200 Series	2008-04-15	794
2010-05-03	4C	MERCEDES BENZ 515CDI/3665	200 Series	2008-04-15	808
2010-05-13	4C	MERCEDES BENZ 515CDI/3665	200 Series	2008-04-15	838
2010-06-15	4C	MERCEDES BENZ 515CDI/3665	200 Series	2008-04-15	881
2010-11-22 21:50:00	4C	MERCEDES BENZ 515CDI/3665	200 Series	2008-04-15	932
2010-12-20 21:30:00	4C	MERCEDES BENZ 515CDI/3665	200 Series	2008-04-15	980
2010-12-21 08:00:00	4C	MERCEDES BENZ 515CDI/3665	200 Series	2008-04-15	980
2011-06-12 21:00:00	4C	MERCEDES BENZ 515CDI/3665	200 Series	2008-04-15	1154
2012-02-04 12:30:00	4C	MERCEDES BENZ 515CDI/3665	200 Series	2008-04-15	1391
2012-04-23 11:00:00	4C	MERCEDES BENZ 515CDI/3665	200 Series	2008-04-15	1499
2012-07-11 14:00:00	4C	MERCEDES BENZ 515CDI/3665	200 Series	2008-04-15	1549
2013-03-01	4C	MERCEDES BENZ 515CDI/3665	200 Series	2008-04-15	1781
2009-01-01	5A	MERCEDES BENZ 515CDI/3665	200 Series	2008-04-17	259
2009-12-04	5A	MERCEDES BENZ 515CDI/3665	200 Series	2008-04-17	596
2009-12-18	5A	MERCEDES BENZ 515CDI/3665	200 Series	2008-04-17	610
2009-12-19	5A	MERCEDES BENZ 515CDI/3665	200 Series	2008-04-17	611
2010-01-22	5A	MERCEDES BENZ 515CDI/3665	200 Series	2008-04-17	645
2010-06-23	5A	MERCEDES BENZ 515CDI/3665	200 Series	2008-04-17	797
2010-06-25	5A	MERCEDES BENZ 515CDI/3665	200 Series	2008-04-17	799
2010-07-10	5A	MERCEDES BENZ 515CDI/3665	200 Series	2008-04-17	814
2010-07-27	5A	MERCEDES BENZ 515CDI/3665	200 Series	2008-04-17	831
2010-08-26	5A	MERCEDES BENZ 515CDI/3665	200 Series	2008-04-17	861
2010-10-21 11:15:00	5A	MERCEDES BENZ 515CDI/3665	200 Series	2008-04-17	917.469
2011-01-24 23:40:00	5A	MERCEDES BENZ 515CDI/3665	200 Series	2008-04-17	1012.99
2011-02-10 08:55:00	5A	MERCEDES BENZ 515CDI/3665	200 Series	2008-04-17	1029.37
2011-02-15 14:15:00	5A	MERCEDES BENZ 515CDI/3665	200 Series	2008-04-17	1034.59
2011-04-06 11:00:00	5A	MERCEDES BENZ 515CDI/3665	200 Series	2008-04-17	1084.46
2011-05-04 16:13:00	5A	MERCEDES BENZ 515CDI/3665	200 Series	2008-04-17	1112.68
2011-10-20 08:45:00	5A	MERCEDES BENZ 515CDI/3665	200 Series	2008-04-17	1281.36
2011-10-25 02:00:00	5A	MERCEDES BENZ 515CDI/3665	200 Series	2008-04-17	1286.08
2011-11-12 02:30:00	5A	MERCEDES BENZ 515CDI/3665	200 Series	2008-04-17	1304.1
2012-03-27 22:00:00	5A	MERCEDES BENZ 515CDI/3665	200 Series	2008-04-17	1440.92
2012-04-17 23:00:00	5A	MERCEDES BENZ 515CDI/3665	200 Series	2008-04-17	1461.96
2012-05-07 08:00:00	5A	MERCEDES BENZ 515CDI/3665	200 Series	2008-04-17	1481.33
2012-06-21 13:00:00	5A	MERCEDES BENZ 515CDI/3665	200 Series	2008-04-17	1526.54
2012-06-29 22:00:00	5A	MERCEDES BENZ 515CDI/3665	200 Series	2008-04-17	1534.92
2012-10-08 21:00:00	5A	MERCEDES BENZ 515CDI/3665	200 Series	2008-04-17	1635.88
2013-01-20 11:40:00	5A	MERCEDES BENZ 515CDI/3665	200 Series	2008-04-17	1739.49
2013-03-01	5A	MERCEDES BENZ 515CDI/3665	200 Series	2008-04-17	1779
2011-04-01	48P	MERCEDES BENZ 515CDI/3665	400 Series	2010-01-14	442
2011-07-06 23:00:00	48P	MERCEDES BENZ 515CDI/3665	400 Series	2010-01-14	538.958
2011-07-24 11:30:00	48P	MERCEDES BENZ 515CDI/3665	400 Series	2010-01-14	556.479
2011-07-31 22:58:00	48P	MERCEDES BENZ 515CDI/3665	400 Series	2010-01-14	563.957
2011-11-21 11:00:00	48P	MERCEDES BENZ 515CDI/3665	400 Series	2010-01-14	676.458
2012-03-16 09:45:00	48P	MERCEDES BENZ 515CDI/3665	400 Series	2010-01-14	792.406
2012-04-05 11:00:00	48P	MERCEDES BENZ 515CDI/3665	400 Series	2010-01-14	812.458
2012-06-04 08:00:00	48P	MERCEDES BENZ 515CDI/3665	400 Series	2010-01-14	872.333
2012-06-04 12:00:00	48P	MERCEDES BENZ 515CDI/3665	400 Series	2010-01-14	872.5
2012-06-04 12:00:00	48P	MERCEDES BENZ 515CDI/3665	400 Series	2010-01-14	872.5
2012-10-30 14:30:00	48P	MERCEDES BENZ 515CDI/3665	400 Series	2010-01-14	1020.6
2012-11-09 09:00:00	48P	MERCEDES BENZ 515CDI/3665	400 Series	2010-01-14	1030.38
2012-11-23 14:00:00	48P	MERCEDES BENZ 515CDI/3665	400 Series	2010-01-14	1044.58
2013-03-01	48P	MERCEDES BENZ 515CDI/3665	400 Series	2010-01-14	1142
2011-04-01	51D	MERCEDES BENZ 515CDI/3665	400 Series	2010-01-27	429
2011-07-15 20:30:00	51D	MERCEDES BENZ 515CDI/3665	400 Series	2010-01-27	534.854
2011-11-17 13:00:00	51D	MERCEDES BENZ 515CDI/3665	400 Series	2010-01-27	659.542
2012-01-01 06:00:00	51D	MERCEDES BENZ 515CDI/3665	400 Series	2010-01-27	704.25
2012-10-12 16:50:00	51D	MERCEDES BENZ 515CDI/3665	400 Series	2010-01-27	989.701
2013-01-13 07:15:00	51D	MERCEDES BENZ 515CDI/3665	400 Series	2010-01-27	1082.3
2013-02-18 21:00:00	51D	MERCEDES BENZ 515CDI/3665	400 Series	2010-01-27	1118.88
2013-02-20 10:00:00	51D	MERCEDES BENZ 515CDI/3665	400 Series	2010-01-27	1120.42
2013-03-01	51D	MERCEDES BENZ 515CDI/3665	400 Series	2010-01-27	1129
2011-04-01	52B	MERCEDES BENZ 515CDI/3665	400 Series	2010-01-27	429
2011-05-29 03:00:00	52B	MERCEDES BENZ 515CDI/3665	400 Series	2010-01-27	487.125
2011-07-21 12:00:00	52B	MERCEDES BENZ 515CDI/3665	400 Series	2010-01-27	540.5
2011-10-17 17:20:00	52B	MERCEDES BENZ 515CDI/3665	400 Series	2010-01-27	628.722
2011-10-18 20:30:00	52B	MERCEDES BENZ 515CDI/3665	400 Series	2010-01-27	629.854
2011-11-17 16:00:00	52B	MERCEDES BENZ 515CDI/3665	400 Series	2010-01-27	659.667
2011-12-21 17:30:00	52B	MERCEDES BENZ 515CDI/3665	400 Series	2010-01-27	693.729
2012-03-13 07:30:00	52B	MERCEDES BENZ 515CDI/3665	400 Series	2010-01-27	776.312
2012-03-20 08:00:00	52B	MERCEDES BENZ 515CDI/3665	400 Series	2010-01-27	783.333
2012-05-24 14:00:00	52B	MERCEDES BENZ 515CDI/3665	400 Series	2010-01-27	848.583
2012-05-28 00:30:00	52B	MERCEDES BENZ 515CDI/3665	400 Series	2010-01-27	852.021
2012-06-03 08:30:00	52B	MERCEDES BENZ 515CDI/3665	400 Series	2010-01-27	858.354
2012-06-04 19:00:00	52B	MERCEDES BENZ 515CDI/3665	400 Series	2010-01-27	859.792
2012-06-25 17:00:00	52B	MERCEDES BENZ 515CDI/3665	400 Series	2010-01-27	880.708
2012-08-05 18:00:00	52B	MERCEDES BENZ 515CDI/3665	400 Series	2010-01-27	921.75
2012-08-23 21:30:00	52B	MERCEDES BENZ 515CDI/3665	400 Series	2010-01-27	939.896
2012-11-03 09:30:00	52B	MERCEDES BENZ 515CDI/3665	400 Series	2010-01-27	1011.4
2012-11-11 22:30:00	52B	MERCEDES BENZ 515CDI/3665	400 Series	2010-01-27	1019.94
2013-02-11 21:30:00	52B	MERCEDES BENZ 515CDI/3665	400 Series	2010-01-27	1111.9
2013-03-01	52B	MERCEDES BENZ 515CDI/3665	400 Series	2010-01-27	1129
2011-04-01	53Z	MERCEDES BENZ 515CDI/3665	400 Series	2010-02-01	424
2011-04-17 20:30:00	53Z	MERCEDES BENZ 515CDI/3665	400 Series	2010-02-01	440.854
2011-05-10 18:45:00	53Z	MERCEDES BENZ 515CDI/3665	400 Series	2010-02-01	463.781
2012-01-17 12:30:00	53Z	MERCEDES BENZ 515CDI/3665	400 Series	2010-02-01	715.521
2012-03-05 13:00:00	53Z	MERCEDES BENZ 515CDI/3665	400 Series	2010-02-01	763.542
2012-06-01 07:00:00	53Z	MERCEDES BENZ 515CDI/3665	400 Series	2010-02-01	851.292
2012-07-18 08:00:00	53Z	MERCEDES BENZ 515CDI/3665	400 Series	2010-02-01	898.333
2012-08-24 08:00:00	53Z	MERCEDES BENZ 515CDI/3665	400 Series	2010-02-01	935.333
2012-09-03 08:30:00	53Z	MERCEDES BENZ 515CDI/3665	400 Series	2010-02-01	945.354
2012-09-13 19:20:00	53Z	MERCEDES BENZ 515CDI/3665	400 Series	2010-02-01	955.806
2013-03-01 09:50:00	53Z	MERCEDES BENZ 515CDI/3665	400 Series	2010-02-01	1124.41
2011-04-01	54X	MERCEDES BENZ 515CDI/3665	400 Series	2010-02-01	424
2011-11-15 19:45:00	54X	MERCEDES BENZ 515CDI/3665	400 Series	2010-02-01	652.823
2012-03-28 23:00:00	54X	MERCEDES BENZ 515CDI/3665	400 Series	2010-02-01	786.958
2012-04-03 17:30:00	54X	MERCEDES BENZ 515CDI/3665	400 Series	2010-02-01	792.729
2012-05-20 10:10:00	54X	MERCEDES BENZ 515CDI/3665	400 Series	2010-02-01	839.424
2012-07-18 15:00:00	54X	MERCEDES BENZ 515CDI/3665	400 Series	2010-02-01	898.625
2012-09-17 15:00:00	54X	MERCEDES BENZ 515CDI/3665	400 Series	2010-02-01	959.625
2012-09-25 22:00:00	54X	MERCEDES BENZ 515CDI/3665	400 Series	2010-02-01	967.917
2012-10-03 09:45:00	54X	MERCEDES BENZ 515CDI/3665	400 Series	2010-02-01	975.406
2012-10-06 01:30:00	54X	MERCEDES BENZ 515CDI/3665	400 Series	2010-02-01	978.062
2013-03-01	54X	MERCEDES BENZ 515CDI/3665	400 Series	2010-02-01	1124
2011-04-01	56R	MERCEDES BENZ 515CDI/3665	400 Series	2010-02-08	417
2011-11-25 15:00:00	56R	MERCEDES BENZ 515CDI/3665	400 Series	2010-02-08	655.625
2012-06-18 05:00:00	56R	MERCEDES BENZ 515CDI/3665	400 Series	2010-02-08	861.208
2012-07-29 09:30:00	56R	MERCEDES BENZ 515CDI/3665	400 Series	2010-02-08	902.396
2012-11-25 07:45:00	56R	MERCEDES BENZ 515CDI/3665	400 Series	2010-02-08	1021.32
2012-12-07 22:00:00	56R	MERCEDES BENZ 515CDI/3665	400 Series	2010-02-08	1033.92
2013-01-17 16:30:00	56R	MERCEDES BENZ 515CDI/3665	400 Series	2010-02-08	1074.69
2013-03-01	56R	MERCEDES BENZ 515CDI/3665	400 Series	2010-02-08	1117
2011-04-01	57M	MERCEDES BENZ 515CDI/3665	400 Series	2010-02-26	399
2011-06-12 14:40:00	57M	MERCEDES BENZ 515CDI/3665	400 Series	2010-02-26	472
2011-06-26 11:30:00	57M	MERCEDES BENZ 515CDI/3665	400 Series	2010-02-26	485
2011-11-09 11:30:00	57M	MERCEDES BENZ 515CDI/3665	400 Series	2010-02-26	621
2012-01-14 09:45:00	57M	MERCEDES BENZ 515CDI/3665	400 Series	2010-02-26	687
2012-03-01 03:30:00	57M	MERCEDES BENZ 515CDI/3665	400 Series	2010-02-26	774
2012-04-07 08:00:00	57M	MERCEDES BENZ 515CDI/3665	400 Series	2010-02-26	801
2012-05-07 07:00:00	57M	MERCEDES BENZ 515CDI/3665	400 Series	2010-02-26	821
2012-05-16 21:30:00	57M	MERCEDES BENZ 515CDI/3665	400 Series	2010-02-26	831
2012-05-16 21:40:00	57M	MERCEDES BENZ 515CDI/3665	400 Series	2010-02-26	831
2012-07-06 09:00:00	57M	MERCEDES BENZ 515CDI/3665	400 Series	2010-02-26	861
2012-07-25 11:45:00	57M	MERCEDES BENZ 515CDI/3665	400 Series	2010-02-26	880
2012-10-29 08:00:00	57M	MERCEDES BENZ 515CDI/3665	400 Series	2010-02-26	976
2013-03-01	57M	MERCEDES BENZ 515CDI/3665	400 Series	2010-02-26	1099
2011-04-01	58K	MERCEDES BENZ 515CDI/3665	400 Series	2010-02-26	399
2011-06-04 08:30:00	58K	MERCEDES BENZ 515CDI/3665	400 Series	2010-02-26	463
2012-02-09 05:45:00	58K	MERCEDES BENZ 515CDI/3665	400 Series	2010-02-26	683
2012-03-28 12:00:00	58K	MERCEDES BENZ 515CDI/3665	400 Series	2010-02-26	782
2012-08-12 22:00:00	58K	MERCEDES BENZ 515CDI/3665	400 Series	2010-02-26	899
2012-09-02 20:10:00	58K	MERCEDES BENZ 515CDI/3665	400 Series	2010-02-26	920
2012-09-07 19:00:00	58K	MERCEDES BENZ 515CDI/3665	400 Series	2010-02-26	925
2012-09-10 21:40:00	58K	MERCEDES BENZ 515CDI/3665	400 Series	2010-02-26	928
2012-09-16 22:00:00	58K	MERCEDES BENZ 515CDI/3665	400 Series	2010-02-26	934
2012-10-27 11:30:00	58K	MERCEDES BENZ 515CDI/3665	400 Series	2010-02-26	974
2012-11-18 20:30:00	58K	MERCEDES BENZ 515CDI/3665	400 Series	2010-02-26	997
2013-01-02 05:00:00	58K	MERCEDES BENZ 515CDI/3665	400 Series	2010-02-26	1041
2013-01-06 12:45:00	58K	MERCEDES BENZ 515CDI/3665	400 Series	2010-02-26	1046
2013-01-31 14:00:00	58K	MERCEDES BENZ 515CDI/3665	400 Series	2010-02-26	1071
2013-02-04 09:15:00	58K	MERCEDES BENZ 515CDI/3665	400 Series	2010-02-26	1074
2013-03-01	58K	MERCEDES BENZ 515CDI/3665	400 Series	2010-02-26	1099
2011-04-01	59H	MERCEDES BENZ 515CDI/3665	400 Series	2010-03-16	381
2011-04-24 08:30:00	59H	MERCEDES BENZ 515CDI/3665	400 Series	2010-03-16	404.354
2011-08-24	59H	MERCEDES BENZ 515CDI/3665	400 Series	2010-03-16	526
2011-09-17 14:00:00	59H	MERCEDES BENZ 515CDI/3665	400 Series	2010-03-16	550.583
2012-02-22 08:00:00	59H	MERCEDES BENZ 515CDI/3665	400 Series	2010-03-16	708.333
2012-05-19 00:30:00	59H	MERCEDES BENZ 515CDI/3665	400 Series	2010-03-16	795.021
2012-05-19 10:30:00	59H	MERCEDES BENZ 515CDI/3665	400 Series	2010-03-16	795.438
2012-09-03 18:00:00	59H	MERCEDES BENZ 515CDI/3665	400 Series	2010-03-16	902.75
2013-03-01	59H	MERCEDES BENZ 515CDI/3665	400 Series	2010-03-16	1081
2011-04-01	66L	MERCEDES BENZ 515CDI/3665	400 Series	2010-03-24	373
2011-11-25 09:00:00	66L	MERCEDES BENZ 515CDI/3665	400 Series	2010-03-24	611.375
2011-12-22 08:00:00	66L	MERCEDES BENZ 515CDI/3665	400 Series	2010-03-24	638.333
2012-06-15 13:00:00	66L	MERCEDES BENZ 515CDI/3665	400 Series	2010-03-24	814.542
2012-06-25 16:30:00	66L	MERCEDES BENZ 515CDI/3665	400 Series	2010-03-24	824.688
2012-11-01 01:45:00	66L	MERCEDES BENZ 515CDI/3665	400 Series	2010-03-24	953.073
2013-01-03 18:40:00	66L	MERCEDES BENZ 515CDI/3665	400 Series	2010-03-24	1016.78
2013-01-14 00:50:00	66L	MERCEDES BENZ 515CDI/3665	400 Series	2010-03-24	1027.03
2013-01-15 13:00:00	66L	MERCEDES BENZ 515CDI/3665	400 Series	2010-03-24	1028.54
2013-02-04 16:40:00	66L	MERCEDES BENZ 515CDI/3665	400 Series	2010-03-24	1048.69
2013-02-11 20:30:00	66L	MERCEDES BENZ 515CDI/3665	400 Series	2010-03-24	1055.85
2013-03-01	66L	MERCEDES BENZ 515CDI/3665	400 Series	2010-03-24	1073
2011-04-01	67J	MERCEDES BENZ 515CDI/3665	400 Series	2010-04-01	365
2011-05-16 19:35:00	67J	MERCEDES BENZ 515CDI/3665	400 Series	2010-04-01	410.816
2011-06-04 21:30:00	67J	MERCEDES BENZ 515CDI/3665	400 Series	2010-04-01	429.896
2011-06-10 14:15:00	67J	MERCEDES BENZ 515CDI/3665	400 Series	2010-04-01	435.594
2011-12-05	67J	MERCEDES BENZ 515CDI/3665	400 Series	2010-04-01	613
2011-12-19 23:30:00	67J	MERCEDES BENZ 515CDI/3665	400 Series	2010-04-01	627.979
2012-01-28 20:00:00	67J	MERCEDES BENZ 515CDI/3665	400 Series	2010-04-01	667.833
2012-03-16 15:30:00	67J	MERCEDES BENZ 515CDI/3665	400 Series	2010-04-01	715.646
2012-03-22 13:00:00	67J	MERCEDES BENZ 515CDI/3665	400 Series	2010-04-01	721.542
2012-07-28	67J	MERCEDES BENZ 515CDI/3665	400 Series	2010-04-01	849
2012-08-01 12:00:00	67J	MERCEDES BENZ 515CDI/3665	400 Series	2010-04-01	853.5
2012-08-17 06:30:00	67J	MERCEDES BENZ 515CDI/3665	400 Series	2010-04-01	869.271
2012-09-25 09:30:00	67J	MERCEDES BENZ 515CDI/3665	400 Series	2010-04-01	908.396
2013-03-01	67J	MERCEDES BENZ 515CDI/3665	400 Series	2010-04-01	1065
2011-04-01	68G	MERCEDES BENZ 515CDI/3665	400 Series	2010-04-06	360
2011-06-01 03:10:00	68G	MERCEDES BENZ 515CDI/3665	400 Series	2010-04-06	421.132
2011-06-09 19:40:00	68G	MERCEDES BENZ 515CDI/3665	400 Series	2010-04-06	429.819
2011-10-10 08:00:00	68G	MERCEDES BENZ 515CDI/3665	400 Series	2010-04-06	552.333
2011-10-14 09:20:00	68G	MERCEDES BENZ 515CDI/3665	400 Series	2010-04-06	556.389
2012-03-21 15:45:00	68G	MERCEDES BENZ 515CDI/3665	400 Series	2010-04-06	715.656
2012-06-02 20:30:00	68G	MERCEDES BENZ 515CDI/3665	400 Series	2010-04-06	788.854
2012-07-20 11:00:00	68G	MERCEDES BENZ 515CDI/3665	400 Series	2010-04-06	836.458
2012-07-23 14:45:00	68G	MERCEDES BENZ 515CDI/3665	400 Series	2010-04-06	839.615
2012-08-22 16:30:00	68G	MERCEDES BENZ 515CDI/3665	400 Series	2010-04-06	869.688
2012-10-23 09:50:00	68G	MERCEDES BENZ 515CDI/3665	400 Series	2010-04-06	931.41
2013-01-23 16:00:00	68G	MERCEDES BENZ 515CDI/3665	400 Series	2010-04-06	1023.67
2013-02-19 13:00:00	68G	MERCEDES BENZ 515CDI/3665	400 Series	2010-04-06	1050.54
2013-02-23 14:00:00	68G	MERCEDES BENZ 515CDI/3665	400 Series	2010-04-06	1054.58
2013-02-26 20:30:00	68G	MERCEDES BENZ 515CDI/3665	400 Series	2010-04-06	1057.85
2013-03-01	68G	MERCEDES BENZ 515CDI/3665	400 Series	2010-04-06	1060
2011-04-01	89X	MERCEDES BENZ 515CDI/3665	400 Series	2010-04-15	351
2011-05-21 13:00:00	89X	MERCEDES BENZ 515CDI/3665	400 Series	2010-04-15	481.542
2012-03-23 11:00:00	89X	MERCEDES BENZ 515CDI/3665	400 Series	2010-04-15	742.458
2012-04-19 15:15:00	89X	MERCEDES BENZ 515CDI/3665	400 Series	2010-04-15	755.635
2012-05-31 22:10:00	89X	MERCEDES BENZ 515CDI/3665	400 Series	2010-04-15	777.924
2012-06-19 14:00:00	89X	MERCEDES BENZ 515CDI/3665	400 Series	2010-04-15	796.583
2012-07-31 18:30:00	89X	MERCEDES BENZ 515CDI/3665	400 Series	2010-04-15	838.771
2012-08-01 13:45:00	89X	MERCEDES BENZ 515CDI/3665	400 Series	2010-04-15	839.573
2012-11-02 10:00:00	89X	MERCEDES BENZ 515CDI/3665	400 Series	2010-04-15	899.237
2012-11-02 10:00:00	89X	MERCEDES BENZ 515CDI/3665	400 Series	2010-04-15	932.417
2012-11-02 10:00:00	89X	MERCEDES BENZ 515CDI/3665	400 Series	2010-04-15	982.417
2013-01-30 00:50:00	89X	MERCEDES BENZ 515CDI/3665	400 Series	2010-04-15	1021.03
2013-03-01	89X	MERCEDES BENZ 515CDI/3665	400 Series	2010-04-15	1051
2011-04-01	92K	MERCEDES BENZ 515CDI/3665	400 Series	2010-04-20	346
2011-04-26 20:30:00	92K	MERCEDES BENZ 515CDI/3665	400 Series	2010-04-20	391.854
2011-07-25 18:45:00	92K	MERCEDES BENZ 515CDI/3665	400 Series	2010-04-20	411.781
2011-07-25 18:45:00	92K	MERCEDES BENZ 515CDI/3665	400 Series	2010-04-20	461.781
2011-07-25 18:45:00	92K	MERCEDES BENZ 515CDI/3665	400 Series	2010-04-20	471.781
2011-12-30 13:00:00	92K	MERCEDES BENZ 515CDI/3665	400 Series	2010-04-20	593.542
2012-01-26 08:30:00	92K	MERCEDES BENZ 515CDI/3665	400 Series	2010-04-20	636.354
2012-02-16 08:30:00	92K	MERCEDES BENZ 515CDI/3665	400 Series	2010-04-20	667.354
2012-02-16 08:30:00	92K	MERCEDES BENZ 515CDI/3665	400 Series	2010-04-20	689.354
2012-02-16 08:30:00	92K	MERCEDES BENZ 515CDI/3665	400 Series	2010-04-20	717.354
2012-06-02 08:00:00	92K	MERCEDES BENZ 515CDI/3665	400 Series	2010-04-20	774.333
2013-03-01	92K	MERCEDES BENZ 515CDI/3665	400 Series	2010-04-20	1046
2011-04-01	93H	MERCEDES BENZ 515CDI/3665	400 Series	2010-04-23	343
2011-06-11 07:45:00	93H	MERCEDES BENZ 515CDI/3665	400 Series	2010-04-23	414.323
2011-07-17 10:30:00	93H	MERCEDES BENZ 515CDI/3665	400 Series	2010-04-23	450.438
2011-10-17 00:50:00	93H	MERCEDES BENZ 515CDI/3665	400 Series	2010-04-23	542.035
2011-12-21	93H	MERCEDES BENZ 515CDI/3665	400 Series	2010-04-23	607
2012-03-21 20:00:00	93H	MERCEDES BENZ 515CDI/3665	400 Series	2010-04-23	698.833
2012-05-19 01:30:00	93H	MERCEDES BENZ 515CDI/3665	400 Series	2010-04-23	757.062
2012-06-15 13:00:00	93H	MERCEDES BENZ 515CDI/3665	400 Series	2010-04-23	784.542
2012-06-24 01:20:00	93H	MERCEDES BENZ 515CDI/3665	400 Series	2010-04-23	793.056
2012-07-12 16:00:00	93H	MERCEDES BENZ 515CDI/3665	400 Series	2010-04-23	811.667
2012-07-14 14:00:00	93H	MERCEDES BENZ 515CDI/3665	400 Series	2010-04-23	813.583
2012-10-11 21:00:00	93H	MERCEDES BENZ 515CDI/3665	400 Series	2010-04-23	902.875
2012-11-29 08:15:00	93H	MERCEDES BENZ 515CDI/3665	400 Series	2010-04-23	951.344
2013-02-05 17:30:00	93H	MERCEDES BENZ 515CDI/3665	400 Series	2010-04-23	1019.73
2013-03-01	93H	MERCEDES BENZ 515CDI/3665	400 Series	2010-04-23	1043
2011-04-01	23E	MERCEDES BENZ 515CDI/3665	400 Series	2010-04-29	337
2011-04-18 08:00:00	23E	MERCEDES BENZ 515CDI/3665	400 Series	2010-04-29	354.333
2011-05-07 01:20:00	23E	MERCEDES BENZ 515CDI/3665	400 Series	2010-04-29	373.056
2011-07-10 20:50:00	23E	MERCEDES BENZ 515CDI/3665	400 Series	2010-04-29	437.868
2011-11-12 13:00:00	23E	MERCEDES BENZ 515CDI/3665	400 Series	2010-04-29	562.542
2012-01-16 08:45:00	23E	MERCEDES BENZ 515CDI/3665	400 Series	2010-04-29	627.365
2012-02-13 09:10:00	23E	MERCEDES BENZ 515CDI/3665	400 Series	2010-04-29	655.382
2012-03-12 12:00:00	23E	MERCEDES BENZ 515CDI/3665	400 Series	2010-04-29	683.5
2012-05-09 10:30:00	23E	MERCEDES BENZ 515CDI/3665	400 Series	2010-04-29	741.438
2012-05-15 14:00:00	23E	MERCEDES BENZ 515CDI/3665	400 Series	2010-04-29	747.583
2012-07-21 22:30:00	23E	MERCEDES BENZ 515CDI/3665	400 Series	2010-04-29	814.938
2012-07-22 09:00:00	23E	MERCEDES BENZ 515CDI/3665	400 Series	2010-04-29	815.375
2012-10-25 15:30:00	23E	MERCEDES BENZ 515CDI/3665	400 Series	2010-04-29	910.646
2012-10-26 23:30:00	23E	MERCEDES BENZ 515CDI/3665	400 Series	2010-04-29	911.979
2012-11-21 10:30:00	23E	MERCEDES BENZ 515CDI/3665	400 Series	2010-04-29	937.438
2013-03-01	23E	MERCEDES BENZ 515CDI/3665	400 Series	2010-04-29	1037
2009-01-01	12	MERCEDES BENZ 416CDI/3550	52/53 Series	2007-04-02	640
2009-02-10	12	MERCEDES BENZ 416CDI/3550	52/53 Series	2007-04-02	680
2009-03-25	12	MERCEDES BENZ 416CDI/3550	52/53 Series	2007-04-02	723
2009-04-05	12	MERCEDES BENZ 416CDI/3550	52/53 Series	2007-04-02	734
2009-04-12	12	MERCEDES BENZ 416CDI/3550	52/53 Series	2007-04-02	741
2009-04-25	12	MERCEDES BENZ 416CDI/3550	52/53 Series	2007-04-02	754
2009-06-04	12	MERCEDES BENZ 416CDI/3550	52/53 Series	2007-04-02	794
2009-06-12	12	MERCEDES BENZ 416CDI/3550	52/53 Series	2007-04-02	802
2009-07-04	12	MERCEDES BENZ 416CDI/3550	52/53 Series	2007-04-02	824
2009-07-20	12	MERCEDES BENZ 416CDI/3550	52/53 Series	2007-04-02	840
2009-08-31	12	MERCEDES BENZ 416CDI/3550	52/53 Series	2007-04-02	882
2009-09-09	12	MERCEDES BENZ 416CDI/3550	52/53 Series	2007-04-02	891
2009-11-08	12	MERCEDES BENZ 416CDI/3550	52/53 Series	2007-04-02	951
2009-11-14	12	MERCEDES BENZ 416CDI/3550	52/53 Series	2007-04-02	957
2009-12-17	12	MERCEDES BENZ 416CDI/3550	52/53 Series	2007-04-02	990
2009-12-21	12	MERCEDES BENZ 416CDI/3550	52/53 Series	2007-04-02	994
2010-01-27	12	MERCEDES BENZ 416CDI/3550	52/53 Series	2007-04-02	1031
2010-03-29	12	MERCEDES BENZ 416CDI/3550	52/53 Series	2007-04-02	1092
2010-03-30	12	MERCEDES BENZ 416CDI/3550	52/53 Series	2007-04-02	1093
2010-06-25	12	MERCEDES BENZ 416CDI/3550	52/53 Series	2007-04-02	1180
2010-08-30	12	MERCEDES BENZ 416CDI/3550	52/53 Series	2007-04-02	1246
2011-04-06 11:49:00	12	MERCEDES BENZ 416CDI/3550	52/53 Series	2007-04-02	1465.49
2012-06-21 13:15:00	12	MERCEDES BENZ 416CDI/3550	52/53 Series	2007-04-02	1907.55
2012-07-06 06:30:00	12	MERCEDES BENZ 416CDI/3550	52/53 Series	2007-04-02	1922.27
2012-07-18 10:00:00	12	MERCEDES BENZ 416CDI/3550	52/53 Series	2007-04-02	1934.42
2012-08-13 18:30:00	12	MERCEDES BENZ 416CDI/3550	52/53 Series	2007-04-02	1960.77
2012-11-15	12	MERCEDES BENZ 416CDI/3550	52/53 Series	2007-04-02	2054
2012-12-03 04:40:00	12	MERCEDES BENZ 416CDI/3550	52/53 Series	2007-04-02	2072.19
2012-12-20 09:00:00	12	MERCEDES BENZ 416CDI/3550	52/53 Series	2007-04-02	2089.38
2012-12-31 05:30:00	12	MERCEDES BENZ 416CDI/3550	52/53 Series	2007-04-02	2100.23
2013-01-11 11:30:00	12	MERCEDES BENZ 416CDI/3550	52/53 Series	2007-04-02	2111.48
2013-02-01 19:30:00	12	MERCEDES BENZ 416CDI/3550	52/53 Series	2007-04-02	2132.81
2013-03-01	12	MERCEDES BENZ 416CDI/3550	52/53 Series	2007-04-02	2160
2009-01-01	13	MERCEDES BENZ 416CDI/3550	52/53 Series	2007-04-02	640
2009-03-02	13	MERCEDES BENZ 416CDI/3550	52/53 Series	2007-04-02	700
2009-03-19	13	MERCEDES BENZ 416CDI/3550	52/53 Series	2007-04-02	717
2009-03-30	13	MERCEDES BENZ 416CDI/3550	52/53 Series	2007-04-02	728
2009-06-02	13	MERCEDES BENZ 416CDI/3550	52/53 Series	2007-04-02	792
2009-06-03	13	MERCEDES BENZ 416CDI/3550	52/53 Series	2007-04-02	793
2009-06-15	13	MERCEDES BENZ 416CDI/3550	52/53 Series	2007-04-02	805
2009-07-08	13	MERCEDES BENZ 416CDI/3550	52/53 Series	2007-04-02	828
2009-08-09	13	MERCEDES BENZ 416CDI/3550	52/53 Series	2007-04-02	860
2009-10-08	13	MERCEDES BENZ 416CDI/3550	52/53 Series	2007-04-02	920
2010-01-22	13	MERCEDES BENZ 416CDI/3550	52/53 Series	2007-04-02	1026
2010-02-05	13	MERCEDES BENZ 416CDI/3550	52/53 Series	2007-04-02	1040
2010-03-15	13	MERCEDES BENZ 416CDI/3550	52/53 Series	2007-04-02	1078
2010-03-16	13	MERCEDES BENZ 416CDI/3550	52/53 Series	2007-04-02	1079
2010-03-23	13	MERCEDES BENZ 416CDI/3550	52/53 Series	2007-04-02	1086
2010-04-07	13	MERCEDES BENZ 416CDI/3550	52/53 Series	2007-04-02	1101
2010-06-22	13	MERCEDES BENZ 416CDI/3550	52/53 Series	2007-04-02	1177
2010-08-09	13	MERCEDES BENZ 416CDI/3550	52/53 Series	2007-04-02	1225
2010-10-07 12:00:00	13	MERCEDES BENZ 416CDI/3550	52/53 Series	2007-04-02	1284.5
2010-10-28 15:00:00	13	MERCEDES BENZ 416CDI/3550	52/53 Series	2007-04-02	1305.62
2010-12-17 10:40:00	13	MERCEDES BENZ 416CDI/3550	52/53 Series	2007-04-02	1355.44
2011-02-12 12:30:00	13	MERCEDES BENZ 416CDI/3550	52/53 Series	2007-04-02	1412.52
2011-02-14 11:30:00	13	MERCEDES BENZ 416CDI/3550	52/53 Series	2007-04-02	1414.48
2011-02-15 20:30:00	13	MERCEDES BENZ 416CDI/3550	52/53 Series	2007-04-02	1415.85
2011-04-12 10:45:00	13	MERCEDES BENZ 416CDI/3550	52/53 Series	2007-04-02	1471.45
2011-06-04 10:30:00	13	MERCEDES BENZ 416CDI/3550	52/53 Series	2007-04-02	1524.44
2011-07-02 21:00:00	13	MERCEDES BENZ 416CDI/3550	52/53 Series	2007-04-02	1552.88
2011-07-03 13:00:00	13	MERCEDES BENZ 416CDI/3550	52/53 Series	2007-04-02	1553.54
2011-09-23 17:00:00	13	MERCEDES BENZ 416CDI/3550	52/53 Series	2007-04-02	1635.71
2011-11-11 10:30:00	13	MERCEDES BENZ 416CDI/3550	52/53 Series	2007-04-02	1684.44
2011-12-28 11:00:00	13	MERCEDES BENZ 416CDI/3550	52/53 Series	2007-04-02	1731.46
2012-09-20 09:00:00	13	MERCEDES BENZ 416CDI/3550	52/53 Series	2007-04-02	1998.38
2012-09-26 01:40:00	13	MERCEDES BENZ 416CDI/3550	52/53 Series	2007-04-02	2004.07
2012-10-04 08:00:00	13	MERCEDES BENZ 416CDI/3550	52/53 Series	2007-04-02	2012.33
2012-11-12 20:45:00	13	MERCEDES BENZ 416CDI/3550	52/53 Series	2007-04-02	2051.86
2012-11-25 05:40:00	13	MERCEDES BENZ 416CDI/3550	52/53 Series	2007-04-02	2064.24
2012-12-11 08:15:00	13	MERCEDES BENZ 416CDI/3550	52/53 Series	2007-04-02	2080.34
2013-01-10 21:30:00	13	MERCEDES BENZ 416CDI/3550	52/53 Series	2007-04-02	2110.9
2013-01-16 15:00:00	13	MERCEDES BENZ 416CDI/3550	52/53 Series	2007-04-02	2116.62
2013-01-23 15:30:00	13	MERCEDES BENZ 416CDI/3550	52/53 Series	2007-04-02	2123.65
2013-03-01	13	MERCEDES BENZ 416CDI/3550	52/53 Series	2007-04-02	2160
2009-01-01	15	MERCEDES BENZ 416CDI/3550	52/53 Series	2007-04-14	628
2009-03-02	15	MERCEDES BENZ 416CDI/3550	52/53 Series	2007-04-14	688
2009-04-29	15	MERCEDES BENZ 416CDI/3550	52/53 Series	2007-04-14	746
2009-05-06	15	MERCEDES BENZ 416CDI/3550	52/53 Series	2007-04-14	753
2009-06-01	15	MERCEDES BENZ 416CDI/3550	52/53 Series	2007-04-14	779
2009-06-19	15	MERCEDES BENZ 416CDI/3550	52/53 Series	2007-04-14	797
2009-09-10	15	MERCEDES BENZ 416CDI/3550	52/53 Series	2007-04-14	880
2009-11-17	15	MERCEDES BENZ 416CDI/3550	52/53 Series	2007-04-14	948
2010-01-28	15	MERCEDES BENZ 416CDI/3550	52/53 Series	2007-04-14	1020
2010-02-25	15	MERCEDES BENZ 416CDI/3550	52/53 Series	2007-04-14	1048
2010-03-05	15	MERCEDES BENZ 416CDI/3550	52/53 Series	2007-04-14	1056
2010-04-12	15	MERCEDES BENZ 416CDI/3550	52/53 Series	2007-04-14	1094
2010-04-29	15	MERCEDES BENZ 416CDI/3550	52/53 Series	2007-04-14	1111
2010-06-17	15	MERCEDES BENZ 416CDI/3550	52/53 Series	2007-04-14	1160
2010-07-06	15	MERCEDES BENZ 416CDI/3550	52/53 Series	2007-04-14	1179
2010-08-07	15	MERCEDES BENZ 416CDI/3550	52/53 Series	2007-04-14	1211
2010-10-06 08:00:00	15	MERCEDES BENZ 416CDI/3550	52/53 Series	2007-04-14	1271.33
2010-12-05 20:50:00	15	MERCEDES BENZ 416CDI/3550	52/53 Series	2007-04-14	1331.87
2011-02-28 08:30:00	15	MERCEDES BENZ 416CDI/3550	52/53 Series	2007-04-14	1416.35
2011-11-22 17:00:00	15	MERCEDES BENZ 416CDI/3550	52/53 Series	2007-04-14	1683.71
2013-01-17 11:20:00	15	MERCEDES BENZ 416CDI/3550	52/53 Series	2007-04-14	2105.47
2013-03-01	15	MERCEDES BENZ 416CDI/3550	52/53 Series	2007-04-14	2148
2009-01-01	16	MERCEDES BENZ 416CDI/3550	52/53 Series	2007-04-14	628
2009-01-14	16	MERCEDES BENZ 416CDI/3550	52/53 Series	2007-04-14	641
2009-02-27	16	MERCEDES BENZ 416CDI/3550	52/53 Series	2007-04-14	685
2009-04-14	16	MERCEDES BENZ 416CDI/3550	52/53 Series	2007-04-14	731
2009-04-25	16	MERCEDES BENZ 416CDI/3550	52/53 Series	2007-04-14	742
2009-07-29	16	MERCEDES BENZ 416CDI/3550	52/53 Series	2007-04-14	837
2009-08-13	16	MERCEDES BENZ 416CDI/3550	52/53 Series	2007-04-14	852
2009-08-30	16	MERCEDES BENZ 416CDI/3550	52/53 Series	2007-04-14	869
2009-09-08	16	MERCEDES BENZ 416CDI/3550	52/53 Series	2007-04-14	878
2009-09-13	16	MERCEDES BENZ 416CDI/3550	52/53 Series	2007-04-14	883
2009-09-17	16	MERCEDES BENZ 416CDI/3550	52/53 Series	2007-04-14	887
2010-01-02	16	MERCEDES BENZ 416CDI/3550	52/53 Series	2007-04-14	994
2010-03-03	16	MERCEDES BENZ 416CDI/3550	52/53 Series	2007-04-14	1054
2010-05-31	16	MERCEDES BENZ 416CDI/3550	52/53 Series	2007-04-14	1143
2010-06-06	16	MERCEDES BENZ 416CDI/3550	52/53 Series	2007-04-14	1149
2011-10-11 08:00:00	16	MERCEDES BENZ 416CDI/3550	52/53 Series	2007-04-14	1641.33
2012-10-19 16:20:00	16	MERCEDES BENZ 416CDI/3550	52/53 Series	2007-04-14	2015.68
2013-01-08 09:00:00	16	MERCEDES BENZ 416CDI/3550	52/53 Series	2007-04-14	2096.38
2013-03-01	16	MERCEDES BENZ 416CDI/3550	52/53 Series	2007-04-14	2148
2009-01-01	17	MERCEDES BENZ 416CDI/3550	52/53 Series	2007-04-28	614
2009-01-26	17	MERCEDES BENZ 416CDI/3550	52/53 Series	2007-04-28	639
2009-03-15	17	MERCEDES BENZ 416CDI/3550	52/53 Series	2007-04-28	687
2009-03-18	17	MERCEDES BENZ 416CDI/3550	52/53 Series	2007-04-28	690
2009-03-21	17	MERCEDES BENZ 416CDI/3550	52/53 Series	2007-04-28	693
2009-04-19	17	MERCEDES BENZ 416CDI/3550	52/53 Series	2007-04-28	722
2009-04-28	17	MERCEDES BENZ 416CDI/3550	52/53 Series	2007-04-28	731
2009-05-02	17	MERCEDES BENZ 416CDI/3550	52/53 Series	2007-04-28	735
2009-05-13	17	MERCEDES BENZ 416CDI/3550	52/53 Series	2007-04-28	746
2009-06-16	17	MERCEDES BENZ 416CDI/3550	52/53 Series	2007-04-28	780
2009-07-07	17	MERCEDES BENZ 416CDI/3550	52/53 Series	2007-04-28	801
2009-07-27	17	MERCEDES BENZ 416CDI/3550	52/53 Series	2007-04-28	821
2009-08-09	17	MERCEDES BENZ 416CDI/3550	52/53 Series	2007-04-28	834
2009-12-02	17	MERCEDES BENZ 416CDI/3550	52/53 Series	2007-04-28	949
2009-12-31	17	MERCEDES BENZ 416CDI/3550	52/53 Series	2007-04-28	978
2010-01-17	17	MERCEDES BENZ 416CDI/3550	52/53 Series	2007-04-28	995
2010-02-15	17	MERCEDES BENZ 416CDI/3550	52/53 Series	2007-04-28	1024
2010-03-13	17	MERCEDES BENZ 416CDI/3550	52/53 Series	2007-04-28	1050
2010-04-17	17	MERCEDES BENZ 416CDI/3550	52/53 Series	2007-04-28	1085
2010-11-09 11:00:00	17	MERCEDES BENZ 416CDI/3550	52/53 Series	2007-04-28	1291.46
2010-11-22 10:30:00	17	MERCEDES BENZ 416CDI/3550	52/53 Series	2007-04-28	1304.44
2011-04-08 14:00:00	17	MERCEDES BENZ 416CDI/3550	52/53 Series	2007-04-28	1441.58
2011-07-28 17:30:00	17	MERCEDES BENZ 416CDI/3550	52/53 Series	2007-04-28	1552.73
2012-02-01 20:00:00	17	MERCEDES BENZ 416CDI/3550	52/53 Series	2007-04-28	1740.83
2012-02-05 15:00:00	17	MERCEDES BENZ 416CDI/3550	52/53 Series	2007-04-28	1744.62
2012-03-27 11:30:00	17	MERCEDES BENZ 416CDI/3550	52/53 Series	2007-04-28	1795.48
2012-05-22 08:15:00	17	MERCEDES BENZ 416CDI/3550	52/53 Series	2007-04-28	1851.34
2012-07-02 08:00:00	17	MERCEDES BENZ 416CDI/3550	52/53 Series	2007-04-28	1892.33
2012-08-29 20:00:00	17	MERCEDES BENZ 416CDI/3550	52/53 Series	2007-04-28	1950.83
2012-12-08 09:00:00	17	MERCEDES BENZ 416CDI/3550	52/53 Series	2007-04-28	2051.38
2013-03-01	17	MERCEDES BENZ 416CDI/3550	52/53 Series	2007-04-28	2134
2009-01-01	95	MERCEDES BENZ 416CDI/3550	52/53 Series	2007-07-26	525
2009-02-13	95	MERCEDES BENZ 416CDI/3550	52/53 Series	2007-07-26	568
2009-03-25	95	MERCEDES BENZ 416CDI/3550	52/53 Series	2007-07-26	608
2009-04-06	95	MERCEDES BENZ 416CDI/3550	52/53 Series	2007-07-26	620
2009-04-11	95	MERCEDES BENZ 416CDI/3550	52/53 Series	2007-07-26	625
2009-05-17	95	MERCEDES BENZ 416CDI/3550	52/53 Series	2007-07-26	661
2009-10-05 21:00:00	95	MERCEDES BENZ 416CDI/3550	52/53 Series	2007-07-26	802.875
2009-11-09	95	MERCEDES BENZ 416CDI/3550	52/53 Series	2007-07-26	837
2009-11-22	95	MERCEDES BENZ 416CDI/3550	52/53 Series	2007-07-26	850
2009-12-03	95	MERCEDES BENZ 416CDI/3550	52/53 Series	2007-07-26	861
2009-12-27	95	MERCEDES BENZ 416CDI/3550	52/53 Series	2007-07-26	885
2010-01-22	95	MERCEDES BENZ 416CDI/3550	52/53 Series	2007-07-26	911
2010-02-08	95	MERCEDES BENZ 416CDI/3550	52/53 Series	2007-07-26	928
2010-03-14	95	MERCEDES BENZ 416CDI/3550	52/53 Series	2007-07-26	962
2010-03-28	95	MERCEDES BENZ 416CDI/3550	52/53 Series	2007-07-26	976
2010-04-01	95	MERCEDES BENZ 416CDI/3550	52/53 Series	2007-07-26	980
2010-07-25	95	MERCEDES BENZ 416CDI/3550	52/53 Series	2007-07-26	1095
2010-12-03 18:40:00	95	MERCEDES BENZ 416CDI/3550	52/53 Series	2007-07-26	1226.78
2010-12-05 03:10:00	95	MERCEDES BENZ 416CDI/3550	52/53 Series	2007-07-26	1228.13
2011-02-16 09:00:00	95	MERCEDES BENZ 416CDI/3550	52/53 Series	2007-07-26	1301.38
2011-06-07 21:40:00	95	MERCEDES BENZ 416CDI/3550	52/53 Series	2007-07-26	1412.9
2011-06-23 09:25:00	95	MERCEDES BENZ 416CDI/3550	52/53 Series	2007-07-26	1428.39
2011-07-28 21:30:00	95	MERCEDES BENZ 416CDI/3550	52/53 Series	2007-07-26	1463.9
2011-10-25 10:00:00	95	MERCEDES BENZ 416CDI/3550	52/53 Series	2007-07-26	1552.42
2012-04-10 08:30:00	95	MERCEDES BENZ 416CDI/3550	52/53 Series	2007-07-26	1720.35
2012-04-10 10:00:00	95	MERCEDES BENZ 416CDI/3550	52/53 Series	2007-07-26	1720.42
2012-04-15 01:30:00	95	MERCEDES BENZ 416CDI/3550	52/53 Series	2007-07-26	1725.06
2012-05-01 22:30:00	95	MERCEDES BENZ 416CDI/3550	52/53 Series	2007-07-26	1741.94
2012-05-23 11:00:00	95	MERCEDES BENZ 416CDI/3550	52/53 Series	2007-07-26	1763.46
2012-06-21 09:00:00	95	MERCEDES BENZ 416CDI/3550	52/53 Series	2007-07-26	1792.38
2012-08-09 21:30:00	95	MERCEDES BENZ 416CDI/3550	52/53 Series	2007-07-26	1841.9
2012-11-02 13:00:00	95	MERCEDES BENZ 416CDI/3550	52/53 Series	2007-07-26	1926.54
2013-01-18 18:30:00	95	MERCEDES BENZ 416CDI/3550	52/53 Series	2007-07-26	2003.77
2013-02-16 21:00:00	95	MERCEDES BENZ 416CDI/3550	52/53 Series	2007-07-26	2032.88
2013-03-01	95	MERCEDES BENZ 416CDI/3550	52/53 Series	2007-07-26	2045
2009-01-01	96	MERCEDES BENZ 416CDI/3550	52/53 Series	2007-07-26	525
2009-05-01	96	MERCEDES BENZ 416CDI/3550	52/53 Series	2007-07-26	645
2009-06-19	96	MERCEDES BENZ 416CDI/3550	52/53 Series	2007-07-26	694
2009-07-20	96	MERCEDES BENZ 416CDI/3550	52/53 Series	2007-07-26	725
2009-12-14 14:45:00	96	MERCEDES BENZ 416CDI/3550	52/53 Series	2007-07-26	872.615
2010-02-01 09:00:00	96	MERCEDES BENZ 416CDI/3550	52/53 Series	2007-07-26	921.375
2010-02-04 08:00:00	96	MERCEDES BENZ 416CDI/3550	52/53 Series	2007-07-26	924.333
2010-02-17 18:45:00	96	MERCEDES BENZ 416CDI/3550	52/53 Series	2007-07-26	937.781
2010-02-21 21:05:00	96	MERCEDES BENZ 416CDI/3550	52/53 Series	2007-07-26	941.878
2010-02-26 07:24:00	96	MERCEDES BENZ 416CDI/3550	52/53 Series	2007-07-26	946.308
2010-03-03 20:30:00	96	MERCEDES BENZ 416CDI/3550	52/53 Series	2007-07-26	951.854
2010-10-02 15:30:00	96	MERCEDES BENZ 416CDI/3550	52/53 Series	2007-07-26	1164.65
2013-03-01	96	MERCEDES BENZ 416CDI/3550	52/53 Series	2007-07-26	2045
2009-01-01	97	MERCEDES BENZ 416CDI/3550	52/53 Series	2007-07-26	525
2009-03-21 15:00:00	97	MERCEDES BENZ 416CDI/3550	52/53 Series	2007-07-26	604.625
2009-04-30 07:50:00	97	MERCEDES BENZ 416CDI/3550	52/53 Series	2007-07-26	644.326
2009-06-12 17:52:00	97	MERCEDES BENZ 416CDI/3550	52/53 Series	2007-07-26	687.744
2009-07-24 13:40:00	97	MERCEDES BENZ 416CDI/3550	52/53 Series	2007-07-26	729.569
2009-09-28 19:14:00	97	MERCEDES BENZ 416CDI/3550	52/53 Series	2007-07-26	795.801
2009-09-28 19:14:00	97	MERCEDES BENZ 416CDI/3550	52/53 Series	2007-07-26	795.801
2009-10-28 09:10:00	97	MERCEDES BENZ 416CDI/3550	52/53 Series	2007-07-26	825.382
2009-11-07 12:15:00	97	MERCEDES BENZ 416CDI/3550	52/53 Series	2007-07-26	835.51
2009-11-15 08:25:00	97	MERCEDES BENZ 416CDI/3550	52/53 Series	2007-07-26	843.351
2010-01-22 02:00:00	97	MERCEDES BENZ 416CDI/3550	52/53 Series	2007-07-26	911.083
2010-03-12 06:00:00	97	MERCEDES BENZ 416CDI/3550	52/53 Series	2007-07-26	960.25
2010-05-10 10:45:00	97	MERCEDES BENZ 416CDI/3550	52/53 Series	2007-07-26	1019.45
2010-09-01 06:19:00	97	MERCEDES BENZ 416CDI/3550	52/53 Series	2007-07-26	1133.26
2010-09-25 09:00:00	97	MERCEDES BENZ 416CDI/3550	52/53 Series	2007-07-26	1157.38
2011-01-05 13:30:00	97	MERCEDES BENZ 416CDI/3550	52/53 Series	2007-07-26	1259.56
2011-10-09 07:15:00	97	MERCEDES BENZ 416CDI/3550	52/53 Series	2007-07-26	1536.3
2011-11-10 08:30:00	97	MERCEDES BENZ 416CDI/3550	52/53 Series	2007-07-26	1568.35
2012-01-09 17:30:00	97	MERCEDES BENZ 416CDI/3550	52/53 Series	2007-07-26	1628.73
2012-07-28 08:30:00	97	MERCEDES BENZ 416CDI/3550	52/53 Series	2007-07-26	1829.35
2012-08-16 21:00:00	97	MERCEDES BENZ 416CDI/3550	52/53 Series	2007-07-26	1848.88
2012-08-31 23:00:00	97	MERCEDES BENZ 416CDI/3550	52/53 Series	2007-07-26	1863.96
2012-10-29 10:00:00	97	MERCEDES BENZ 416CDI/3550	52/53 Series	2007-07-26	1922.42
2012-11-27 07:15:00	97	MERCEDES BENZ 416CDI/3550	52/53 Series	2007-07-26	1951.3
2012-11-29 07:15:00	97	MERCEDES BENZ 416CDI/3550	52/53 Series	2007-07-26	1953.3
2013-01-22 21:00:00	97	MERCEDES BENZ 416CDI/3550	52/53 Series	2007-07-26	2007.88
2013-02-14 10:45:00	97	MERCEDES BENZ 416CDI/3550	52/53 Series	2007-07-26	2030.45
2013-03-01	97	MERCEDES BENZ 416CDI/3550	52/53 Series	2007-07-26	2045
2009-01-01	98	MERCEDES BENZ 416CDI/3550	52/53 Series	2007-07-26	525
2009-03-24 06:15:00	98	MERCEDES BENZ 416CDI/3550	52/53 Series	2007-07-26	607.26
2009-03-25 09:30:00	98	MERCEDES BENZ 416CDI/3550	52/53 Series	2007-07-26	608.396
2009-05-31 14:00:00	98	MERCEDES BENZ 416CDI/3550	52/53 Series	2007-07-26	675.583
2009-06-06 14:00:00	98	MERCEDES BENZ 416CDI/3550	52/53 Series	2007-07-26	681.583
2009-07-19 19:45:00	98	MERCEDES BENZ 416CDI/3550	52/53 Series	2007-07-26	724.823
2009-08-02 20:00:00	98	MERCEDES BENZ 416CDI/3550	52/53 Series	2007-07-26	738.833
2009-09-09 12:10:00	98	MERCEDES BENZ 416CDI/3550	52/53 Series	2007-07-26	776.507
2009-10-03 18:30:00	98	MERCEDES BENZ 416CDI/3550	52/53 Series	2007-07-26	800.771
2009-11-16 21:00:00	98	MERCEDES BENZ 416CDI/3550	52/53 Series	2007-07-26	844.875
2009-11-18 20:20:00	98	MERCEDES BENZ 416CDI/3550	52/53 Series	2007-07-26	846.847
2009-12-08 09:45:00	98	MERCEDES BENZ 416CDI/3550	52/53 Series	2007-07-26	866.406
2009-12-09 13:51:00	98	MERCEDES BENZ 416CDI/3550	52/53 Series	2007-07-26	867.577
2009-12-25 19:40:00	98	MERCEDES BENZ 416CDI/3550	52/53 Series	2007-07-26	883.819
2010-03-04 06:05:00	98	MERCEDES BENZ 416CDI/3550	52/53 Series	2007-07-26	952.253
2010-04-16 15:15:00	98	MERCEDES BENZ 416CDI/3550	52/53 Series	2007-07-26	995.635
2012-12-26 10:40:00	98	MERCEDES BENZ 416CDI/3550	52/53 Series	2007-07-26	1980.44
2013-03-01	98	MERCEDES BENZ 416CDI/3550	52/53 Series	2007-07-26	2045
2009-01-01	99	MERCEDES BENZ 416CDI/3550	52/53 Series	2007-07-27	524
2009-01-14	99	MERCEDES BENZ 416CDI/3550	52/53 Series	2007-07-27	537
2009-01-17	99	MERCEDES BENZ 416CDI/3550	52/53 Series	2007-07-27	540
2009-01-18	99	MERCEDES BENZ 416CDI/3550	52/53 Series	2007-07-27	541
2009-03-30	99	MERCEDES BENZ 416CDI/3550	52/53 Series	2007-07-27	612
2009-04-02	99	MERCEDES BENZ 416CDI/3550	52/53 Series	2007-07-27	615
2009-04-08	99	MERCEDES BENZ 416CDI/3550	52/53 Series	2007-07-27	621
2009-04-28	99	MERCEDES BENZ 416CDI/3550	52/53 Series	2007-07-27	641
2009-05-03	99	MERCEDES BENZ 416CDI/3550	52/53 Series	2007-07-27	646
2009-08-22	99	MERCEDES BENZ 416CDI/3550	52/53 Series	2007-07-27	757
2009-09-01	99	MERCEDES BENZ 416CDI/3550	52/53 Series	2007-07-27	767
2009-09-15	99	MERCEDES BENZ 416CDI/3550	52/53 Series	2007-07-27	781
2009-09-24	99	MERCEDES BENZ 416CDI/3550	52/53 Series	2007-07-27	790
2009-10-10	99	MERCEDES BENZ 416CDI/3550	52/53 Series	2007-07-27	806
2009-10-27	99	MERCEDES BENZ 416CDI/3550	52/53 Series	2007-07-27	823
2009-11-04	99	MERCEDES BENZ 416CDI/3550	52/53 Series	2007-07-27	831
2009-12-07	99	MERCEDES BENZ 416CDI/3550	52/53 Series	2007-07-27	864
2009-12-14	99	MERCEDES BENZ 416CDI/3550	52/53 Series	2007-07-27	871
2009-12-27	99	MERCEDES BENZ 416CDI/3550	52/53 Series	2007-07-27	884
2010-01-06	99	MERCEDES BENZ 416CDI/3550	52/53 Series	2007-07-27	894
2010-01-26	99	MERCEDES BENZ 416CDI/3550	52/53 Series	2007-07-27	914
2011-03-28 08:30:00	99	MERCEDES BENZ 416CDI/3550	52/53 Series	2007-07-27	1340.35
2012-04-10 10:00:00	99	MERCEDES BENZ 416CDI/3550	52/53 Series	2007-07-27	1719.42
2012-11-16 14:00:00	99	MERCEDES BENZ 416CDI/3550	52/53 Series	2007-07-27	1939.58
2013-03-01	99	MERCEDES BENZ 416CDI/3550	52/53 Series	2007-07-27	2044
2009-01-01	00	MERCEDES BENZ 416CDI/3550	52/53 Series	2007-07-28	523
2009-03-26	00	MERCEDES BENZ 416CDI/3550	52/53 Series	2007-07-28	607
2009-06-02	00	MERCEDES BENZ 416CDI/3550	52/53 Series	2007-07-28	675
2009-06-02	00	MERCEDES BENZ 416CDI/3550	52/53 Series	2007-07-28	675
2009-06-13	00	MERCEDES BENZ 416CDI/3550	52/53 Series	2007-07-28	686
2009-06-20	00	MERCEDES BENZ 416CDI/3550	52/53 Series	2007-07-28	693
2009-07-19	00	MERCEDES BENZ 416CDI/3550	52/53 Series	2007-07-28	722
2009-07-29	00	MERCEDES BENZ 416CDI/3550	52/53 Series	2007-07-28	732
2009-08-03	00	MERCEDES BENZ 416CDI/3550	52/53 Series	2007-07-28	737
2009-09-07	00	MERCEDES BENZ 416CDI/3550	52/53 Series	2007-07-28	772
2009-10-22	00	MERCEDES BENZ 416CDI/3550	52/53 Series	2007-07-28	817
2009-12-31	00	MERCEDES BENZ 416CDI/3550	52/53 Series	2007-07-28	887
2010-02-22	00	MERCEDES BENZ 416CDI/3550	52/53 Series	2007-07-28	940
2010-07-16	00	MERCEDES BENZ 416CDI/3550	52/53 Series	2007-07-28	1084
2010-12-19 12:00:00	00	MERCEDES BENZ 416CDI/3550	52/53 Series	2007-07-28	1240.5
2010-12-28 11:55:00	00	MERCEDES BENZ 416CDI/3550	52/53 Series	2007-07-28	1249.5
2011-02-03 19:50:00	00	MERCEDES BENZ 416CDI/3550	52/53 Series	2007-07-28	1286.83
2011-05-11 09:50:00	00	MERCEDES BENZ 416CDI/3550	52/53 Series	2007-07-28	1383.41
2011-05-31 13:00:00	00	MERCEDES BENZ 416CDI/3550	52/53 Series	2007-07-28	1403.54
2011-08-10 15:00:00	00	MERCEDES BENZ 416CDI/3550	52/53 Series	2007-07-28	1474.62
2011-10-15 11:40:00	00	MERCEDES BENZ 416CDI/3550	52/53 Series	2007-07-28	1540.49
2011-11-01 13:00:00	00	MERCEDES BENZ 416CDI/3550	52/53 Series	2007-07-28	1557.54
2012-04-19 13:00:00	00	MERCEDES BENZ 416CDI/3550	52/53 Series	2007-07-28	1727.54
2012-04-23 16:00:00	00	MERCEDES BENZ 416CDI/3550	52/53 Series	2007-07-28	1731.67
2012-07-02 08:00:00	00	MERCEDES BENZ 416CDI/3550	52/53 Series	2007-07-28	1801.33
2012-08-17 09:30:00	00	MERCEDES BENZ 416CDI/3550	52/53 Series	2007-07-28	1847.4
2012-09-18 09:15:00	00	MERCEDES BENZ 416CDI/3550	52/53 Series	2007-07-28	1879.39
2012-10-02 13:50:00	00	MERCEDES BENZ 416CDI/3550	52/53 Series	2007-07-28	1893.58
2012-11-03 02:10:00	00	MERCEDES BENZ 416CDI/3550	52/53 Series	2007-07-28	1925.09
2012-12-09 21:30:00	00	MERCEDES BENZ 416CDI/3550	52/53 Series	2007-07-28	1961.9
2013-01-29 01:00:00	00	MERCEDES BENZ 416CDI/3550	52/53 Series	2007-07-28	2012.04
2013-03-01	00	MERCEDES BENZ 416CDI/3550	52/53 Series	2007-07-28	2043
2009-01-01	01	MERCEDES BENZ 416CDI/3550	52/53 Series	2007-08-01	519
2009-01-20	01	MERCEDES BENZ 416CDI/3550	52/53 Series	2007-08-01	538
2009-03-11	01	MERCEDES BENZ 416CDI/3550	52/53 Series	2007-08-01	588
2009-03-25	01	MERCEDES BENZ 416CDI/3550	52/53 Series	2007-08-01	602
2009-04-03	01	MERCEDES BENZ 416CDI/3550	52/53 Series	2007-08-01	611
2009-05-19	01	MERCEDES BENZ 416CDI/3550	52/53 Series	2007-08-01	657
2009-08-28	01	MERCEDES BENZ 416CDI/3550	52/53 Series	2007-08-01	758
2009-11-21	01	MERCEDES BENZ 416CDI/3550	52/53 Series	2007-08-01	843
2010-02-25	01	MERCEDES BENZ 416CDI/3550	52/53 Series	2007-08-01	939
2010-03-08	01	MERCEDES BENZ 416CDI/3550	52/53 Series	2007-08-01	950
2010-03-23	01	MERCEDES BENZ 416CDI/3550	52/53 Series	2007-08-01	965
2010-06-04	01	MERCEDES BENZ 416CDI/3550	52/53 Series	2007-08-01	1038
2010-12-04 11:00:00	01	MERCEDES BENZ 416CDI/3550	52/53 Series	2007-08-01	1221.46
2011-02-20 08:00:00	01	MERCEDES BENZ 416CDI/3550	52/53 Series	2007-08-01	1299.33
2011-07-29 22:00:00	01	MERCEDES BENZ 416CDI/3550	52/53 Series	2007-08-01	1458.92
2011-08-09 20:00:00	01	MERCEDES BENZ 416CDI/3550	52/53 Series	2007-08-01	1469.83
2011-11-19 10:00:00	01	MERCEDES BENZ 416CDI/3550	52/53 Series	2007-08-01	1571.42
2012-01-09 07:00:00	01	MERCEDES BENZ 416CDI/3550	52/53 Series	2007-08-01	1622.29
2012-02-08 08:00:00	01	MERCEDES BENZ 416CDI/3550	52/53 Series	2007-08-01	1652.33
2012-11-05 00:30:00	01	MERCEDES BENZ 416CDI/3550	52/53 Series	2007-08-01	1923.02
2013-01-17 22:00:00	01	MERCEDES BENZ 416CDI/3550	52/53 Series	2007-08-01	1996.92
2013-02-02 10:15:00	01	MERCEDES BENZ 416CDI/3550	52/53 Series	2007-08-01	2012.43
2013-03-01	01	MERCEDES BENZ 416CDI/3550	52/53 Series	2007-08-01	2039
2009-01-01	02	MERCEDES BENZ 416CDI/3550	52/53 Series	2007-08-01	519
2009-01-01	02	MERCEDES BENZ 416CDI/3550	52/53 Series	2007-08-01	519
2009-04-04	02	MERCEDES BENZ 416CDI/3550	52/53 Series	2007-08-01	612
2009-06-03	02	MERCEDES BENZ 416CDI/3550	52/53 Series	2007-08-01	672
2009-06-16	02	MERCEDES BENZ 416CDI/3550	52/53 Series	2007-08-01	685
2009-07-11	02	MERCEDES BENZ 416CDI/3550	52/53 Series	2007-08-01	710
2009-08-10	02	MERCEDES BENZ 416CDI/3550	52/53 Series	2007-08-01	740
2009-08-18	02	MERCEDES BENZ 416CDI/3550	52/53 Series	2007-08-01	748
2009-09-28	02	MERCEDES BENZ 416CDI/3550	52/53 Series	2007-08-01	789
2009-10-11	02	MERCEDES BENZ 416CDI/3550	52/53 Series	2007-08-01	802
2009-10-13	02	MERCEDES BENZ 416CDI/3550	52/53 Series	2007-08-01	804
2009-10-15	02	MERCEDES BENZ 416CDI/3550	52/53 Series	2007-08-01	806
2009-11-29	02	MERCEDES BENZ 416CDI/3550	52/53 Series	2007-08-01	851
2010-01-31	02	MERCEDES BENZ 416CDI/3550	52/53 Series	2007-08-01	914
2010-02-24	02	MERCEDES BENZ 416CDI/3550	52/53 Series	2007-08-01	938
2010-03-02	02	MERCEDES BENZ 416CDI/3550	52/53 Series	2007-08-01	944
2010-03-11	02	MERCEDES BENZ 416CDI/3550	52/53 Series	2007-08-01	953
2010-06-23	02	MERCEDES BENZ 416CDI/3550	52/53 Series	2007-08-01	1057
2010-08-05	02	MERCEDES BENZ 416CDI/3550	52/53 Series	2007-08-01	1100
2010-09-01 08:25:00	02	MERCEDES BENZ 416CDI/3550	52/53 Series	2007-08-01	1127.35
2010-10-14 08:10:00	02	MERCEDES BENZ 416CDI/3550	52/53 Series	2007-08-01	1170.34
2011-01-01 09:30:00	02	MERCEDES BENZ 416CDI/3550	52/53 Series	2007-08-01	1249.4
2011-04-06 15:30:00	02	MERCEDES BENZ 416CDI/3550	52/53 Series	2007-08-01	1344.65
2011-07-05 19:00:00	02	MERCEDES BENZ 416CDI/3550	52/53 Series	2007-08-01	1434.79
2011-10-18 11:00:00	02	MERCEDES BENZ 416CDI/3550	52/53 Series	2007-08-01	1539.46
2012-04-05 10:30:00	02	MERCEDES BENZ 416CDI/3550	52/53 Series	2007-08-01	1709.44
2012-04-09 04:30:00	02	MERCEDES BENZ 416CDI/3550	52/53 Series	2007-08-01	1713.19
2012-05-19 10:15:00	02	MERCEDES BENZ 416CDI/3550	52/53 Series	2007-08-01	1753.43
2012-08-16 09:30:00	02	MERCEDES BENZ 416CDI/3550	52/53 Series	2007-08-01	1842.4
2013-03-01	02	MERCEDES BENZ 416CDI/3550	52/53 Series	2007-08-01	2039
2009-01-01	03	MERCEDES BENZ 416CDI/3550	52/53 Series	2007-08-01	519
2009-06-05	03	MERCEDES BENZ 416CDI/3550	52/53 Series	2007-08-01	674
2009-07-16	03	MERCEDES BENZ 416CDI/3550	52/53 Series	2007-08-01	715
2009-07-26	03	MERCEDES BENZ 416CDI/3550	52/53 Series	2007-08-01	725
2009-08-14	03	MERCEDES BENZ 416CDI/3550	52/53 Series	2007-08-01	744
2009-10-27	03	MERCEDES BENZ 416CDI/3550	52/53 Series	2007-08-01	818
2009-10-28	03	MERCEDES BENZ 416CDI/3550	52/53 Series	2007-08-01	819
2009-11-07	03	MERCEDES BENZ 416CDI/3550	52/53 Series	2007-08-01	829
2009-11-16	03	MERCEDES BENZ 416CDI/3550	52/53 Series	2007-08-01	838
2009-12-29	03	MERCEDES BENZ 416CDI/3550	52/53 Series	2007-08-01	881
2010-01-04	03	MERCEDES BENZ 416CDI/3550	52/53 Series	2007-08-01	887
2010-01-23	03	MERCEDES BENZ 416CDI/3550	52/53 Series	2007-08-01	906
2010-02-23	03	MERCEDES BENZ 416CDI/3550	52/53 Series	2007-08-01	937
2010-03-26	03	MERCEDES BENZ 416CDI/3550	52/53 Series	2007-08-01	968
2010-05-02	03	MERCEDES BENZ 416CDI/3550	52/53 Series	2007-08-01	1005
2010-06-01	03	MERCEDES BENZ 416CDI/3550	52/53 Series	2007-08-01	1035
2010-06-20	03	MERCEDES BENZ 416CDI/3550	52/53 Series	2007-08-01	1054
2010-08-06	03	MERCEDES BENZ 416CDI/3550	52/53 Series	2007-08-01	1101
2010-09-23 08:20:00	03	MERCEDES BENZ 416CDI/3550	52/53 Series	2007-08-01	1149.35
2010-11-02 08:30:00	03	MERCEDES BENZ 416CDI/3550	52/53 Series	2007-08-01	1189.35
2010-11-22 07:00:00	03	MERCEDES BENZ 416CDI/3550	52/53 Series	2007-08-01	1209.29
2011-01-25 14:50:00	03	MERCEDES BENZ 416CDI/3550	52/53 Series	2007-08-01	1273.62
2011-02-22 03:30:00	03	MERCEDES BENZ 416CDI/3550	52/53 Series	2007-08-01	1301.15
2011-03-23 20:45:00	03	MERCEDES BENZ 416CDI/3550	52/53 Series	2007-08-01	1330.86
2011-05-24 15:15:00	03	MERCEDES BENZ 416CDI/3550	52/53 Series	2007-08-01	1392.64
2011-05-29 14:00:00	03	MERCEDES BENZ 416CDI/3550	52/53 Series	2007-08-01	1397.58
2011-06-05 15:55:00	03	MERCEDES BENZ 416CDI/3550	52/53 Series	2007-08-01	1404.66
2011-07-17 11:55:00	03	MERCEDES BENZ 416CDI/3550	52/53 Series	2007-08-01	1446.5
2012-01-18 09:00:00	03	MERCEDES BENZ 416CDI/3550	52/53 Series	2007-08-01	1631.38
2012-03-18 21:00:00	03	MERCEDES BENZ 416CDI/3550	52/53 Series	2007-08-01	1691.88
2012-03-27 21:30:00	03	MERCEDES BENZ 416CDI/3550	52/53 Series	2007-08-01	1700.9
2012-09-14 20:20:00	03	MERCEDES BENZ 416CDI/3550	52/53 Series	2007-08-01	1871.85
2012-09-25 20:30:00	03	MERCEDES BENZ 416CDI/3550	52/53 Series	2007-08-01	1882.85
2012-10-01 21:00:00	03	MERCEDES BENZ 416CDI/3550	52/53 Series	2007-08-01	1888.88
2012-11-03 22:30:00	03	MERCEDES BENZ 416CDI/3550	52/53 Series	2007-08-01	1921.94
2012-12-18 22:00:00	03	MERCEDES BENZ 416CDI/3550	52/53 Series	2007-08-01	1966.92
2013-02-07 08:00:00	03	MERCEDES BENZ 416CDI/3550	52/53 Series	2007-08-01	2017.33
2013-03-01	03	MERCEDES BENZ 416CDI/3550	52/53 Series	2007-08-01	2039
2009-01-01	04	MERCEDES BENZ 416CDI/3550	52/53 Series	2007-08-02	518
2009-05-28	04	MERCEDES BENZ 416CDI/3550	52/53 Series	2007-08-02	665
2009-06-13	04	MERCEDES BENZ 416CDI/3550	52/53 Series	2007-08-02	681
2009-07-22	04	MERCEDES BENZ 416CDI/3550	52/53 Series	2007-08-02	720
2009-07-28	04	MERCEDES BENZ 416CDI/3550	52/53 Series	2007-08-02	726
2009-09-11	04	MERCEDES BENZ 416CDI/3550	52/53 Series	2007-08-02	771
2009-09-13	04	MERCEDES BENZ 416CDI/3550	52/53 Series	2007-08-02	773
2009-09-25	04	MERCEDES BENZ 416CDI/3550	52/53 Series	2007-08-02	785
2009-10-28	04	MERCEDES BENZ 416CDI/3550	52/53 Series	2007-08-02	818
2010-10-23 11:00:00	04	MERCEDES BENZ 416CDI/3550	52/53 Series	2007-08-02	1178.46
2011-01-01 22:30:00	04	MERCEDES BENZ 416CDI/3550	52/53 Series	2007-08-02	1248.94
2011-02-25 08:20:00	04	MERCEDES BENZ 416CDI/3550	52/53 Series	2007-08-02	1303.35
2011-02-25 17:30:00	04	MERCEDES BENZ 416CDI/3550	52/53 Series	2007-08-02	1303.73
2011-07-29 20:55:00	04	MERCEDES BENZ 416CDI/3550	52/53 Series	2007-08-02	1457.87
2011-10-23 09:55:00	04	MERCEDES BENZ 416CDI/3550	52/53 Series	2007-08-02	1543.41
2012-02-10 10:00:00	04	MERCEDES BENZ 416CDI/3550	52/53 Series	2007-08-02	1653.42
2012-05-19 09:30:00	04	MERCEDES BENZ 416CDI/3550	52/53 Series	2007-08-02	1752.4
2012-08-08 09:00:00	04	MERCEDES BENZ 416CDI/3550	52/53 Series	2007-08-02	1833.38
2012-11-08 07:00:00	04	MERCEDES BENZ 416CDI/3550	52/53 Series	2007-08-02	1925.29
2012-12-04 14:00:00	04	MERCEDES BENZ 416CDI/3550	52/53 Series	2007-08-02	1951.58
2013-01-09 09:00:00	04	MERCEDES BENZ 416CDI/3550	52/53 Series	2007-08-02	1987.38
2013-01-11 21:30:00	04	MERCEDES BENZ 416CDI/3550	52/53 Series	2007-08-02	1989.9
2013-02-24 17:00:00	04	MERCEDES BENZ 416CDI/3550	52/53 Series	2007-08-02	2033.71
2013-03-03 17:15:00	04	MERCEDES BENZ 416CDI/3550	52/53 Series	2007-08-02	2040.72
2013-03-01	04	MERCEDES BENZ 416CDI/3550	52/53 Series	2007-08-02	2038
