# Supplementary material
Source: publisher figshare collection journal article supplement (https://tandf.figshare.com/articles/dataset/_/23786454)
Supplement: Supplementary file 1 [file 2]

# Supplement to “Statistical Modeling of the Effectiveness of Preventive Maintenance for Repairable Systems”

Xin YE<sup>†</sup>, Jiayang CAI<sup>†</sup>, Loon Ching TANG<sup>†</sup>, and Zhi-Sheng YE<sup>†</sup>

<sup>†</sup>Department of Industrial Systems Engineering and Management, National University of Singapore,  
Singapore, 117576

## S1 The Bayesian Inference

In this section, we present the Bayesian inference procedure. In the Bayesian setting, one very first tough question concerns the choice of the prior distribution for parameters. Without sufficient prior information, we may simply use a uniform distribution over the whole parameter space as a non-informative prior (Syversveen, 1998), or leverage the Jeffreys prior that is proportional to the square root of the determinant of the Fisher information matrix (Gelman, 2009), or construct the reference prior by maximizing the missing information of model parameters (Berger et al., 2009). For our service vehicle study, there is no prior information on the reliability of service vehicles and on the preventive maintenance effectiveness. Hence, non-informative priors are considered in our Bayesian inference procedure, which is introduced in greater detail in the sequel.

### S1.1 Bayesian formulation

Consider a generic system that follows the failure process in Section 2.1 of the paper. Recall that the AIC values in our real data example favor the model with a power-law baseline ROCOF  $\lambda_0(t) = (\beta/\eta) (t/\eta)^{\beta-1}$  and the Lognormal( $\mu, \sigma^2$ ) multiplicative PM random effects, i.e., the PLP-Lognormal model. For comparison, we next conduct the Bayesian inference procedure under this PLP-Lognormal model setting and examine its performance. The observed data from this system

is  $\mathbf{D} = \{L, R, N(t) : t \in [L, R]\}$ . The set of PM random effects is  $\mathbf{A} = \{A_k : k\Delta \leq R\}$ . When  $n$  independent systems are under observation, let  $\mathbb{D} = \{\mathbf{D}_i : i = 1, 2, \dots, n\}$  and  $\mathbb{A} = \{\mathbf{A}_i : i = 1, 2, \dots, n\}$  denote the observed data and the PM random effects from all the  $n$  systems, respectively. Conditioning on the PM random effects, the likelihood function can be written as

$$L(\mathbb{D} \mid \mathbb{A}, \beta, \eta) = \prod_{i=1}^n \exp(\Lambda_i(L_i) - \Lambda_i(R_i)) \prod_{t \in [L_i, R_i]} \lambda_i(t)^{dN_i(t)}. \quad (1)$$

In the Bayesian framework, the parameters  $\beta, \eta, \mu, \sigma^2$  and  $\mathbb{A}$  are all assumed random variables. The posterior distribution is

$$\begin{aligned} \pi(\mathbb{A}, \beta, \eta, \mu, \sigma^2 \mid \mathbb{D}) &\propto \pi(\mathbb{D} \mid \mathbb{A}, \beta, \eta) \pi(\mathbb{A}, \beta, \eta, \mu, \sigma^2) \\ &= L(\mathbb{D} \mid \mathbb{A}, \beta, \eta) \pi(\mathbb{A}, \beta, \eta, \mu, \sigma^2). \end{aligned}$$

We assume that  $\beta, \eta, \mu \mid \sigma^2$ , and  $\mathbb{A} \mid \mu, \sigma^2$  are independent, and the prior is given by

$$\pi(\mathbb{A}, \beta, \eta, \mu, \sigma^2) = \pi(\mathbb{A} \mid \mu, \sigma^2) \pi(\mu \mid \sigma^2) \pi(\sigma^2) \pi(\beta) \pi(\eta).$$

The priors are chosen as follows.

- $\pi(A_{ik} \mid \mu, \sigma^2) \sim \text{Lognormal}(\mu, \sigma^2)$ , where  $\mu$  is the mean and  $\sigma^2$  is the variance.
- $\pi(\mu \mid \sigma^2) \sim N(a, \sigma^2/b)$ , where  $a$  is the mean and  $\sigma^2/b$  is the variance.
- $\pi(\sigma^2) \sim \text{Inv-Gamma}(\alpha, \nu)$ , i.e. inverse gamma distribution, where  $\alpha$  is the shape parameter and  $\nu$  is the scale parameter (see also Gelman's Prior distributions for variance parameters for a complete exposition in [Gelman \(2006\)](#)).
- $\pi(\beta) \sim \text{Gamma}(c, d)$ , where  $c$  is the shape parameter and  $d$  is the rate parameter.
- $\pi(\eta) \sim \text{Gamma}(e, f)$ , where  $e$  is the shape parameter and  $f$  is the rate parameter.

The values of hyperparameters  $a, b, \alpha, \nu, c, d, e$  and  $f$  are carefully set to ensure non-informative priors. The specific values of hyperparameters are introduced in Section [S1.4](#). The dependence of the variables are shown in Figure [1](#). With the above settings and the independent and identically

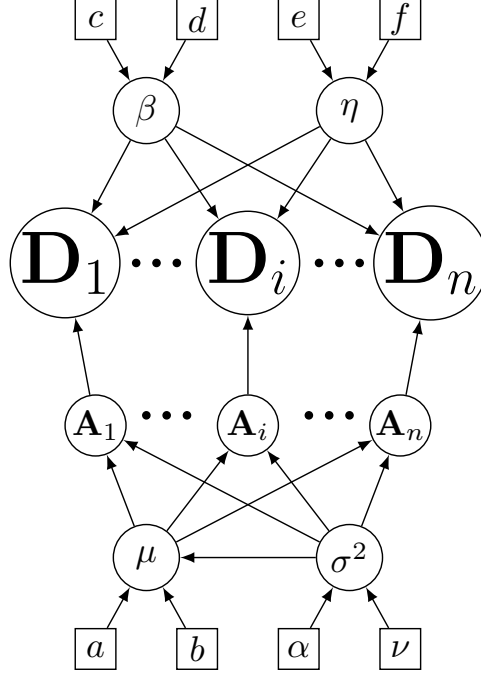

Figure 1: The dependence of the variables. In the directed graph, arrows run into nodes from their direct influences. Rectangle nodes are fixed constants (i.e. hyperparameters), and circular nodes are variables or observed data.

distributed (i.i.d.) unobserved PM random effects  $A_{ik}$  assumption, we have

$$\pi(\mathbb{A} \mid \mu, \sigma^2) = \prod_{i=1}^n \prod_{k=1}^{\lfloor R_i/\Delta \rfloor} \pi(A_{ik} \mid \mu, \sigma^2) = \prod_{i=1}^n \prod_{k=1}^{\lfloor R_i/\Delta \rfloor} \frac{a_{ik}^{-1}}{\sigma \sqrt{2\pi}} \exp \left( -\frac{1}{2} \frac{(\ln(a_{ik}) - \mu)^2}{\sigma^2} \right), \quad (2)$$

As can be seen, combining  $\pi(\mu \mid \sigma^2)$  and  $\pi(\sigma^2)$ , we have  $\pi(\mu, \sigma^2) \sim \text{NIG}(a, b, \alpha, \nu)$ , i.e., normal-inverse gamma distribution as below.

$$\pi(\mu, \sigma^2) = \frac{1}{\sqrt{2\pi}} \frac{\sqrt{b}}{\sigma} \exp \left( -\frac{1}{2} \frac{b(\mu - a)^2}{\sigma^2} \right) \times \frac{\nu^\alpha (\sigma^2)^{-\alpha-1}}{\Gamma(\alpha)} \exp \left( -\frac{\nu}{\sigma^2} \right). \quad (3)$$

We carefully choose the normal-inverse gamma distribution for  $(\mu, \sigma^2)$  to make our formulas analytically tractable. The detailed derivations are introduced in the sequel.

There is no analytical expression for the posterior distribution  $\pi(\mathbb{A}, \beta, \eta, \mu, \sigma^2 \mid \mathbb{D})$ . As such, we use the Markov Chain Monte Carlo (MCMC) algorithm to generate samples from this posterior distribution. These posterior samples are further used to compute the point and interval estimations of the model parameters, which is introduced in the next section.

## S1.2 Gibbs sampling algorithm

To be specific, considering the difficulty in directly sampling from the posterior, we use the Gibbs sampling algorithm (George and McCulloch, 1993). The pseudocode of the Gibbs sampling algorithm is presented in Algorithm 1.

---

### Algorithm 1 Gibbs sampling algorithm

---

**Input:** Initial values  $(\mathbb{A}^{(0)}, \beta^{(0)}, \eta^{(0)}, \mu^{(0)}, (\sigma^2)^{(0)})$ , number of burn-ins  $N_0$  and number of total iterations  $N$ .

**while**  $1 \leq k \leq N$  **do**

$$\mathbb{A}^{(k)} \sim \pi(\mathbb{A} \mid \beta^{(k-1)}, \eta^{(k-1)}, \mu^{(k-1)}, (\sigma^2)^{(k-1)}, \mathbb{D}) \quad (4)$$

$$\beta^{(k)} \sim \pi(\beta \mid \eta^{(k-1)}, \mu^{(k-1)}, (\sigma^2)^{(k-1)}, \mathbb{A}^{(k)}, \mathbb{D}) \quad (5)$$

$$\eta^{(k)} \sim \pi(\eta \mid \beta^{(k)}, \mu^{(k-1)}, (\sigma^2)^{(k-1)}, \mathbb{A}^{(k)}, \mathbb{D}) \quad (6)$$

$$\mu^{(k)} \sim \pi(\mu \mid \beta^{(k)}, \eta^{(k)}, (\sigma^2)^{(k-1)}, \mathbb{A}^{(k)}, \mathbb{D}) \quad (7)$$

$$(\sigma^2)^{(k)} \sim \pi(\sigma^2 \mid \beta^{(k)}, \eta^{(k)}, \mu^{(k)}, \mathbb{A}^{(k)}, \mathbb{D}) \quad (8)$$

**Output:** Sample values  $(\mathbb{A}^{(k)}, \beta^{(k)}, \eta^{(k)}, \mu^{(k)}, (\sigma^2)^{(k)})$ ,  $k = \{N_0 + 1, \dots, N\}$ .

---

Next, we investigate the above full conditional distributions (4)-(8). By combining Equations (1) and (2), we have

$$\begin{aligned} \pi(\mathbb{A} \mid \beta, \eta, \mu, \sigma^2, \mathbb{D}) \propto \prod_{i=1}^n \left( \exp(\Lambda_i(L_i) - \Lambda_i(R_i)) \prod_{t \in [L_i, R_i]} \lambda_i(t)^{dN_i(t)} \right. \\ \left. \prod_{k=1}^{\lfloor R_i/\Delta \rfloor} \frac{a_{ik}^{-1}}{\sigma \sqrt{2\pi}} \exp \left( -\frac{1}{2} \frac{(\ln(a_{ik}) - \mu)^2}{\sigma^2} \right) \right). \end{aligned} \quad (9)$$

By combining Equation (1) and  $\pi(\beta) \sim \text{Gamma}(c, d)$ , we have

$$\pi(\beta \mid \eta, \mu, \sigma^2, \mathbb{A}, \mathbb{D}) \propto \prod_{i=1}^n \left( \exp(\Lambda_i(L_i) - \Lambda_i(R_i)) \prod_{t \in [L_i, R_i]} \lambda_i(t)^{dN_i(t)} \right) \frac{d^c}{\Gamma(c)} \beta^{c-1} \exp(-d\beta), \quad (10)$$

and by combining Equation (1) and  $\pi(\eta) \sim \text{Gamma}(e, f)$ , we have

$$\pi(\eta \mid \beta, \mu, \sigma^2, \mathbb{A}, \mathbb{D}) \propto \prod_{i=1}^n \left( \exp(\Lambda_i(L_i) - \Lambda_i(R_i)) \prod_{t \in [L_i, R_i]} \lambda_i(t)^{dN_i(t)} \right) \frac{f^e}{\Gamma(e)} \eta^{e-1} \exp(-f\eta). \quad (11)$$

By combining Equations (2) and (3), we have

$$\pi(\sigma^2 \mid \beta, \eta, \mu, \mathbb{A}, \mathbb{D}) \propto (\sigma^2)^{-(1+\alpha+\frac{1}{2}+\frac{1}{2}\sum_{i=1}^n \lfloor R_i/\Delta \rfloor)} \times \exp\left(-\frac{\frac{1}{2}\sum_{i=1}^n \sum_{k=1}^{\lfloor R_i/\Delta \rfloor} (\ln(a_{ik}) - \mu)^2 + \frac{1}{2}b(\mu - a)^2 + \nu}{\sigma^2}\right).$$

As can be seen,  $\pi(\sigma^2 \mid \beta, \eta, \mu, \mathbb{A}, \mathbb{D})$  follows an inverse gamma distribution:

$$\text{Inv-Gamma}\left(\alpha + \frac{1}{2} + \frac{1}{2}\sum_{i=1}^n \lfloor R_i/\Delta \rfloor, \frac{1}{2}\sum_{i=1}^n \sum_{k=1}^{\lfloor R_i/\Delta \rfloor} (\ln(a_{ik}) - \mu)^2 + \frac{1}{2}b(\mu - a)^2 + \nu\right).$$

Similarly, by combining Equations (2) and (3), we can obtain

$$\begin{aligned} \pi(\mu \mid \beta, \eta, \sigma^2, \mathbb{A}, \mathbb{D}) &\propto \exp\left(-\frac{1}{2}\sum_{i=1}^n \sum_{k=1}^{\lfloor R_i/\Delta \rfloor} \frac{(\ln(a_{ik}) - \mu)^2}{\sigma^2} - \frac{1}{2}\frac{b(\mu - a)^2}{\sigma^2}\right) \\ &\propto \exp\left(-\sum_{i=1}^n \sum_{k=1}^{\lfloor R_i/\Delta \rfloor} \frac{\mu^2 - 2\mu \ln(a_{ik}) + \ln^2(a_{ik})}{2\sigma^2} - \frac{b\mu^2 - 2ab\mu + a^2b}{2\sigma^2}\right) \\ &\propto \exp\left(-\frac{b + \sum_{i=1}^n \lfloor R_i/\Delta \rfloor}{2\sigma^2} \left[\mu^2 - 2\left(\frac{\sum_{i=1}^n \sum_{k=1}^{\lfloor R_i/\Delta \rfloor} \ln(a_{ik}) + ab}{b + \sum_{i=1}^n \lfloor R_i/\Delta \rfloor}\right)\mu \right. \right. \\ &\quad \left. \left. + \frac{\sum_{i=1}^n \sum_{k=1}^{\lfloor R_i/\Delta \rfloor} \ln^2(a_{ik}) + a^2b}{b + \sum_{i=1}^n \lfloor R_i/\Delta \rfloor}\right]\right) \\ &\propto \exp\left(-\frac{b + \sum_{i=1}^n \lfloor R_i/\Delta \rfloor}{2\sigma^2} \left[\mu - \frac{\sum_{i=1}^n \sum_{k=1}^{\lfloor R_i/\Delta \rfloor} \ln(a_{ik}) + ab}{b + \sum_{i=1}^n \lfloor R_i/\Delta \rfloor}\right]^2\right). \end{aligned}$$

Hence,  $\pi(\mu \mid \beta, \eta, \sigma^2, \mathbb{A}, \mathbb{D})$  follows a normal distribution:

$$N\left(\frac{\sum_{i=1}^n \sum_{k=1}^{\lfloor R_i/\Delta \rfloor} \ln(a_{ik}) + ab}{b + \sum_{i=1}^n \lfloor R_i/\Delta \rfloor}, \frac{\sigma^2}{b + \sum_{i=1}^n \lfloor R_i/\Delta \rfloor}\right).$$

As above, (9), (10) and (11) do not have the analytical expressions and the Metropolis-Hastings (M-H) algorithm is thus used to sample from them at every iteration  $1 \leq k \leq N$  of the above Gibbs sampling algorithm. Consider the  $k$ th iteration of the Gibbs sampling algorithm, and thus we have  $\mathbb{A}^{(k)} \sim \pi(\mathbb{A} \mid \beta^{(k-1)}, \eta^{(k-1)}, \mu^{(k-1)}, (\sigma^2)^{(k-1)}, \mathbb{D})$ . To generate the  $k$ th sample from  $\pi(\mathbb{A} \mid \beta^{(k-1)}, \eta^{(k-1)}, \mu^{(k-1)}, (\sigma^2)^{(k-1)}, \mathbb{D})$ , the M-H algorithm first generates a candidate  $\mathbb{A}^*$  from the pre-specified proposal distribution  $h(\mathbb{A}) = \pi(\mathbb{A} \mid \mu^{(k-1)}, (\sigma^2)^{(k-1)})$ , and then calculates the probability

of accepting this candidate using the acceptance function

$$f\left(\mathbb{A}^{(k-1)}, \mathbb{A}^*\right) = \min \left\{ 1, \frac{\pi\left(\mathbb{D} \mid \mathbb{A}^*, \beta^{(k-1)}, \eta^{(k-1)}, \mu^{(k-1)}, (\sigma^2)^{(k-1)}\right)}{\pi\left(\mathbb{D} \mid \mathbb{A}^{(k-1)}, \beta^{(k-1)}, \eta^{(k-1)}, \mu^{(k-1)}, (\sigma^2)^{(k-1)}\right)} \right\}.$$

A random number  $u$  is then generated from the standard uniform distribution to determine whether to accept this generated candidate. For instance, if  $u < f\left(\mathbb{A}^{(k-1)}, \mathbb{A}^*\right)$ , then the candidate value  $\mathbb{A}^*$  is accepted and we set  $\mathbb{A}^{(k)} = \mathbb{A}^*$ . Otherwise, the candidate value is discarded and we set  $\mathbb{A}^{(k)} = \mathbb{A}^{(k-1)}$ .

Similarly, to generate the  $k$ th samples  $\beta^{(k)}$  and  $\eta^{(k)}$ , we run the random walk M-H algorithm to first generate candidates  $\beta^*$  and  $\eta^*$  from the proposal functions  $h(\beta^* \mid \beta^{(k-1)})$  and  $h(\eta^* \mid \eta^{(k-1)})$ , respectively. The common choice of  $h(\cdot)$  is a normal distribution such that  $h(\beta^* \mid \beta^{(k-1)}) = N(\beta^{(k-1)}, \sigma_\beta^2)$  and  $h(\eta^* \mid \eta^{(k-1)}) = N(\eta^{(k-1)}, \sigma_\eta^2)$ , where  $\sigma_\beta^2$  and  $\sigma_\eta^2$  are constants that are carefully set in Section S1.4. Thus, the acceptance functions are respectively given by

$$f\left(\beta^{(k-1)}, \beta^*\right) = \min \left\{ 1, \frac{\pi(\mathbb{D} \mid \beta^*, \eta^{(k-1)}, \mu^{(k-1)}, (\sigma^2)^{(k-1)}, \mathbb{A}^{(k)})\pi(\beta^*)}{\pi(\mathbb{D} \mid \beta^{(k-1)}, \eta^{(k-1)}, \mu^{(k-1)}, (\sigma^2)^{(k-1)}, \mathbb{A}^{(k)})\pi(\beta^{(k-1)})} \right\},$$

and

$$f\left(\eta^{(k-1)}, \eta^*\right) = \min \left\{ 1, \frac{\pi(\mathbb{D} \mid \eta^*, \beta^{(k)}, \mu^{(k-1)}, (\sigma^2)^{(k-1)}, \mathbb{A}^{(k)})\pi(\eta^*)}{\pi(\mathbb{D} \mid \eta^{(k-1)}, \beta^{(k)}, \mu^{(k-1)}, (\sigma^2)^{(k-1)}, \mathbb{A}^{(k)})\pi(\eta^{(k-1)})} \right\}.$$

We accept the candidate if the value of the acceptance function exceeds a random number generated from the standard uniform distribution. Otherwise, the candidate value is discarded.

### S1.3 Bayesian parameter estimation

In this section, simulation is conducted to check the performance of the Bayesian parameter estimation under the PLP-Lognormal setting. To be specific, we consider the power-law baseline ROCOF  $\lambda_0(t) = (\beta/\eta)(t/\eta)^{\beta-1}$  with  $(\beta, \eta) = (1.25, 100)$  and the Lognormal( $\mu, \sigma^2$ ) PM random effect with  $(\mu, \sigma) \in \{(-1/5, 1/2), (-1/8, 1/2), (-1/10, 1/2)\}$ . As with Section 5.1 of the paper, three levels of the sample size are considered:  $n \in \{30, 45, 60\}$ , four levels of the PM time interval are examined:  $\Delta \in \{365, 450, 540, 630\}$ , and we let the observation window of  $n/3$  systems be  $[400, 2000]$ ,  $n/3$  systems be  $[400, 1200]$ , and the remaining  $n/3$  systems be  $[200, 1800]$ .

For each setting above, we run 1,000 Monte Carlo replications. For each replication, we implement the Gibbs sampling algorithm to sample posterior samples. The detailed discussions on the convergence of the chain induced by the Gibbs sampling algorithm are deferred to Section S1.4. The mean values of posterior samples are used as the point estimations of parameters, and the 95% highest posterior density intervals are computed as the credible interval estimations of parameters. Based on the 1,000 replications, we calculate the bias, root mean squared error (RMSE), and the coverage probability of the 95% highest posterior density interval. All computations were conducted on an Intel(R) Xeon(R) CPU E5-2698 v4 (2.20 GHz).

The estimation results and computation time results are presented in Tables 1-4. These results reveal that the biases and RMSEs are generally small. The coverage probabilities of the 95% highest posterior density intervals for  $\mu$  and  $\sigma$  are closer to the nominal value than  $\beta$  and  $\eta$ . This might be attributed to the inadequate mixing property of the chain for parameters  $\beta$  and  $\eta$ . To support our speculation, we conduct the convergence analysis in Section S1.4, and the convergence diagnostic plots indeed show the inadequate mixing property of the chain and the high level of autocorrelation among samples. In addition, by checking the computation time results, we note in passing that the Bayesian estimation method is generally less computationally efficient than the proposed EM estimation method. Overall, tuning the MCMC algorithm for such a complex posterior in our study is hard and time-consuming.

Table 1: Biases, RMSEs, the coverage probability (CP) of the 95% highest density interval and average computation time (in hours), based on 1,000 Monte Carlo replications, under the PLP-Lognormal model ( $\Delta = 365$ ).

| $n$ | $(\beta, \eta, \mu, \sigma)$ | Run time |                           | $\hat{\beta}$ | $\hat{\eta}$ | $\hat{\mu}$ | $\hat{\sigma}$ |
|-----|------------------------------|----------|---------------------------|---------------|--------------|-------------|----------------|
| 30  | (1.25, 100, $-1/5, 1/2$ )    | 3.025    | bias ( $\times 10^{-2}$ ) | 0.523         | 82.527       | -0.252      | 0.207          |
|     |                              |          | RMSE                      | 0.093         | 23.473       | 0.069       | 0.065          |
|     |                              |          | CP                        | 0.935         | 0.928        | 0.947       | 0.949          |
|     | (1.25, 100, $-1/8, 1/2$ )    | 3.321    | bias ( $\times 10^{-2}$ ) | 0.293         | 89.521       | 0.392       | -0.472         |
|     |                              |          | RMSE                      | 0.108         | 22.194       | 0.075       | 0.052          |
|     |                              |          | CP                        | 0.935         | 0.937        | 0.944       | 0.959          |
|     | (1.25, 100, $-1/10, 1/2$ )   | 3.240    | bias ( $\times 10^{-2}$ ) | 0.674         | 95.361       | -0.341      | -0.452         |
|     |                              |          | RMSE                      | 0.094         | 22.093       | 0.044       | 0.046          |
|     |                              |          | CP                        | 0.937         | 0.931        | 0.943       | 0.958          |
| 45  | (1.25, 100, $-1/5, 1/2$ )    | 4.574    | bias ( $\times 10^{-2}$ ) | 0.426         | 63.215       | -0.083      | 0.035          |
|     |                              |          | RMSE                      | 0.088         | 20.405       | 0.052       | 0.056          |
|     |                              |          | CP                        | 0.945         | 0.941        | 0.942       | 0.958          |
|     | (1.25, 100, $-1/8, 1/2$ )    | 4.329    | bias ( $\times 10^{-2}$ ) | 0.212         | 111.532      | 0.231       | 0.178          |
|     |                              |          | RMSE                      | 0.079         | 18.184       | 0.042       | 0.037          |
|     |                              |          | CP                        | 0.937         | 0.940        | 0.953       | 0.955          |
|     | (1.25, 100, $-1/10, 1/2$ )   | 4.925    | bias ( $\times 10^{-2}$ ) | 0.805         | 122.623      | 0.124       | 0.401          |
|     |                              |          | RMSE                      | 0.115         | 21.162       | 0.048       | 0.036          |
|     |                              |          | CP                        | 0.935         | 0.937        | 0.956       | 0.953          |
| 60  | (1.25, 100, $-1/5, 1/2$ )    | 6.715    | bias ( $\times 10^{-2}$ ) | 0.079         | 124.921      | 0.073       | 0.044          |
|     |                              |          | RMSE                      | 0.073         | 18.491       | 0.039       | 0.038          |
|     |                              |          | CP                        | 0.941         | 0.945        | 0.956       | 0.957          |
|     | (1.25, 100, $-1/8, 1/2$ )    | 6.532    | bias ( $\times 10^{-2}$ ) | 0.125         | 87.315       | 0.088       | 0.213          |
|     |                              |          | RMSE                      | 0.079         | 18.262       | 0.047       | 0.032          |
|     |                              |          | CP                        | 0.944         | 0.943        | 0.949       | 0.953          |
|     | (1.25, 100, $-1/10, 1/2$ )   | 6.357    | bias ( $\times 10^{-2}$ ) | 0.942         | 107.459      | 0.205       | 0.378          |
|     |                              |          | RMSE                      | 0.071         | 16.145       | 0.032       | 0.033          |
|     |                              |          | CP                        | 0.947         | 0.949        | 0.952       | 0.953          |



Table 2: Biases, RMSEs, the coverage probability (CP) of the 95% highest density interval and average computation time (in hours), based on 1,000 Monte Carlo replications, under the PLP-Lognormal model ( $\Delta = 450$ ).

| $n$ | $(\beta, \eta, \mu, \sigma)$  | Run time |                           | $\hat{\beta}$ | $\hat{\eta}$ | $\hat{\mu}$ | $\hat{\sigma}$ |
|-----|-------------------------------|----------|---------------------------|---------------|--------------|-------------|----------------|
| 30  | (1.25, 100, $-1/5$ , $1/2$ )  | 2.934    | bias ( $\times 10^{-2}$ ) | 0.113         | 48.431       | 0.096       | 0.062          |
|     |                               |          | RMSE                      | 0.101         | 21.455       | 0.048       | 0.038          |
|     |                               |          | CP                        | 0.935         | 0.934        | 0.946       | 0.961          |
|     | (1.25, 100, $-1/8$ , $1/2$ )  | 3.046    | bias ( $\times 10^{-2}$ ) | 0.105         | 35.329       | 0.077       | 0.068          |
|     |                               |          | RMSE                      | 0.095         | 20.968       | 0.042       | 0.060          |
|     |                               |          | CP                        | 0.937         | 0.936        | 0.940       | 0.964          |
|     | (1.25, 100, $-1/10$ , $1/2$ ) | 3.032    | bias ( $\times 10^{-2}$ ) | 0.436         | 85.591       | -0.124      | 0.325          |
|     |                               |          | RMSE                      | 0.096         | 25.630       | 0.075       | 0.057          |
|     |                               |          | CP                        | 0.935         | 0.945        | 0.944       | 0.953          |
| 45  | (1.25, 100, $-1/5$ , $1/2$ )  | 4.645    | bias ( $\times 10^{-2}$ ) | 0.095         | 37.481       | 0.102       | 0.055          |
|     |                               |          | RMSE                      | 0.068         | 18.453       | 0.051       | 0.053          |
|     |                               |          | CP                        | 0.941         | 0.938        | 0.947       | 0.957          |
|     | (1.25, 100, $-1/8$ , $1/2$ )  | 4.527    | bias ( $\times 10^{-2}$ ) | 0.084         | 30.531       | 0.062       | 0.043          |
|     |                               |          | RMSE                      | 0.083         | 15.451       | 0.041       | 0.036          |
|     |                               |          | CP                        | 0.945         | 0.943        | 0.948       | 0.960          |
|     | (1.25, 100, $-1/10$ , $1/2$ ) | 4.801    | bias ( $\times 10^{-2}$ ) | 0.341         | 46.682       | 0.117       | -0.245         |
|     |                               |          | RMSE                      | 0.118         | 22.456       | 0.046       | 0.052          |
|     |                               |          | CP                        | 0.938         | 0.941        | 0.948       | 0.954          |
| 60  | (1.25, 100, $-1/5$ , $1/2$ )  | 5.371    | bias ( $\times 10^{-2}$ ) | 0.076         | 36.257       | 0.121       | 0.027          |
|     |                               |          | RMSE                      | 0.061         | 17.627       | 0.034       | 0.040          |
|     |                               |          | CP                        | 0.940         | 0.947        | 0.951       | 0.955          |
|     | (1.25, 100, $-1/8$ , $1/2$ )  | 5.554    | bias ( $\times 10^{-2}$ ) | 0.069         | 25.412       | 0.071       | 0.038          |
|     |                               |          | RMSE                      | 0.082         | 16.641       | 0.042       | 0.033          |
|     |                               |          | CP                        | 0.942         | 0.937        | 0.954       | 0.948          |
|     | (1.25, 100, $-1/10$ , $1/2$ ) | 5.386    | bias ( $\times 10^{-2}$ ) | 0.143         | 32.674       | 0.142       | -0.227         |
|     |                               |          | RMSE                      | 0.085         | 20.943       | 0.032       | 0.051          |
|     |                               |          | CP                        | 0.943         | 0.950        | 0.944       | 0.948          |

Table 3: Biases, RMSEs, the coverage probability (CP) of the 95% highest density interval and average computation time (in hours), based on 1,000 Monte Carlo replications, under the PLP-Lognormal model ( $\Delta = 540$ ).

| $n$ | $(\beta, \eta, \mu, \sigma)$  | Run time |                           | $\hat{\beta}$ | $\hat{\eta}$ | $\hat{\mu}$ | $\hat{\sigma}$ |
|-----|-------------------------------|----------|---------------------------|---------------|--------------|-------------|----------------|
| 30  | (1.25, 100, $-1/5$ , $1/2$ )  | 2.813    | bias ( $\times 10^{-2}$ ) | 0.065         | 87.551       | 0.142       | -0.721         |
|     |                               |          | RMSE                      | 0.084         | 19.571       | 0.053       | 0.048          |
|     |                               |          | CP                        | 0.939         | 0.943        | 0.952       | 0.943          |
|     | (1.25, 100, $-1/8$ , $1/2$ )  | 2.653    | bias ( $\times 10^{-2}$ ) | 0.083         | 47.682       | 0.053       | 0.851          |
|     |                               |          | RMSE                      | 0.073         | 20.372       | 0.053       | 0.049          |
|     |                               |          | CP                        | 0.932         | 0.937        | 0.946       | 0.945          |
|     | (1.25, 100, $-1/10$ , $1/2$ ) | 3.204    | bias ( $\times 10^{-2}$ ) | 0.135         | 41.463       | -0.121      | -0.401         |
|     |                               |          | RMSE                      | 0.086         | 21.571       | 0.053       | 0.032          |
|     |                               |          | CP                        | 0.935         | 0.933        | 0.939       | 0.941          |
| 45  | (1.25, 100, $-1/5$ , $1/2$ )  | 4.671    | bias ( $\times 10^{-2}$ ) | 0.057         | 77.581       | 0.121       | 0.510          |
|     |                               |          | RMSE                      | 0.067         | 16.025       | 0.045       | 0.035          |
|     |                               |          | CP                        | 0.938         | 0.942        | 0.959       | 0.945          |
|     | (1.25, 100, $-1/8$ , $1/2$ )  | 4.324    | bias ( $\times 10^{-2}$ ) | 0.076         | 55.251       | 0.044       | -0.521         |
|     |                               |          | RMSE                      | 0.067         | 17.856       | 0.048       | 0.036          |
|     |                               |          | CP                        | 0.936         | 0.941        | 0.952       | 0.949          |
|     | (1.25, 100, $-1/10$ , $1/2$ ) | 4.463    | bias ( $\times 10^{-2}$ ) | 0.094         | 38.593       | 0.117       | -0.301         |
|     |                               |          | RMSE                      | 0.052         | 19.659       | 0.049       | 0.035          |
|     |                               |          | CP                        | 0.938         | 0.939        | 0.942       | 0.947          |
| 60  | (1.25, 100, $-1/5$ , $1/2$ )  | 5.397    | bias ( $\times 10^{-2}$ ) | 0.047         | 56.138       | 0.091       | 0.305          |
|     |                               |          | RMSE                      | 0.041         | 14.648       | 0.042       | 0.039          |
|     |                               |          | CP                        | 0.945         | 0.941        | 0.960       | 0.944          |
|     | (1.25, 100, $-1/8$ , $1/2$ )  | 5.523    | bias ( $\times 10^{-2}$ ) | 0.083         | 41.543       | 0.035       | -0.355         |
|     |                               |          | RMSE                      | 0.056         | 13.372       | 0.038       | 0.035          |
|     |                               |          | CP                        | 0.943         | 0.944        | 0.949       | 0.952          |
|     | (1.25, 100, $-1/10$ , $1/2$ ) | 5.301    | bias ( $\times 10^{-2}$ ) | 0.044         | 45.102       | 0.098       | -0.283         |
|     |                               |          | RMSE                      | 0.057         | 17.150       | 0.040       | 0.039          |
|     |                               |          | CP                        | 0.945         | 0.946        | 0.947       | 0.952          |

Table 4: Biases, RMSEs, the coverage probability (CP) of the 95% highest density interval and average computation time (in hours), based on 1,000 Monte Carlo replications, under the PLP-Lognormal model ( $\Delta = 630$ ).

| $n$ | $(\beta, \eta, \mu, \sigma)$ | Run time |                           | $\hat{\beta}$ | $\hat{\eta}$ | $\hat{\mu}$ | $\hat{\sigma}$ |
|-----|------------------------------|----------|---------------------------|---------------|--------------|-------------|----------------|
| 30  | (1.25, 100, $-1/8, 1/2$ )    | 2.610    | bias ( $\times 10^{-2}$ ) | 0.243         | 41.572       | 0.075       | 0.347          |
|     |                              |          | RMSE                      | 0.082         | 25.421       | 0.049       | 0.052          |
|     |                              |          | CP                        | 0.936         | 0.932        | 0.942       | 0.955          |
|     | (1.25, 100, $-1/10, 1/2$ )   | 2.849    | bias ( $\times 10^{-2}$ ) | 0.323         | 42.549       | -0.461      | 0.668          |
|     |                              |          | RMSE                      | 0.070         | 26.674       | 0.038       | 0.053          |
|     |                              |          | CP                        | 0.933         | 0.944        | 0.948       | 0.957          |
|     | (1.25, 100, $-1/5, 1/2$ )    | 4.124    | bias ( $\times 10^{-2}$ ) | 0.302         | 24.594       | 0.141       | -0.119         |
|     |                              |          | RMSE                      | 0.032         | 15.148       | 0.059       | 0.045          |
|     |                              |          | CP                        | 0.939         | 0.928        | 0.944       | 0.951          |
| 45  | (1.25, 100, $-1/8, 1/2$ )    | 4.276    | bias ( $\times 10^{-2}$ ) | 0.145         | 27.921       | 0.044       | -0.218         |
|     |                              |          | RMSE                      | 0.065         | 21.343       | 0.045       | 0.036          |
|     |                              |          | CP                        | 0.935         | 0.947        | 0.958       | 0.943          |
|     | (1.25, 100, $-1/10, 1/2$ )   | 4.352    | bias ( $\times 10^{-2}$ ) | 0.156         | 32.814       | 0.315       | -0.406         |
|     |                              |          | RMSE                      | 0.051         | 23.245       | 0.029       | 0.048          |
|     |                              |          | CP                        | 0.929         | 0.945        | 0.947       | 0.958          |
|     | (1.25, 100, $-1/5, 1/2$ )    | 5.548    | bias ( $\times 10^{-2}$ ) | 0.073         | 26.447       | 0.041       | -0.107         |
|     |                              |          | RMSE                      | 0.036         | 16.847       | 0.041       | 0.026          |
|     |                              |          | CP                        | 0.942         | 0.938        | 0.945       | 0.953          |
| 60  | (1.25, 100, $-1/8, 1/2$ )    | 5.218    | bias ( $\times 10^{-2}$ ) | 0.075         | 17.234       | 0.030       | 0.163          |
|     |                              |          | RMSE                      | 0.026         | 14.548       | 0.037       | 0.032          |
|     |                              |          | CP                        | 0.939         | 0.951        | 0.949       | 0.954          |
|     | (1.25, 100, $-1/10, 1/2$ )   | 5.155    | bias ( $\times 10^{-2}$ ) | 0.123         | 23.217       | 0.157       | -0.314         |
|     |                              |          | RMSE                      | 0.051         | 22.534       | 0.027       | 0.042          |
|     |                              |          | CP                        | 0.943         | 0.946        | 0.950       | 0.949          |

## S1.4 Convergence analysis

Next, we summarize the chain induced by the Gibbs sampling algorithm and assess its convergence. The Bayesian parameter estimation is implemented with priors introduced in Section S1.1. To set up non-informative priors, the hyperparameters are set as follows (Spiegelhalter et al., 1996; Gelman, 2006),

$$a = 10^{-3}, b = 10^{-3}, \alpha = 10^{-3}, \nu = 10^{-3}, c = 10^{-4}, d = 10^{-4}, e = 10^{-4}, f = 10^{-4}.$$

The parameters of proposal functions are set as  $\sigma_\beta = 0.22$  and  $\sigma_\eta = 7.20$ . To define the stopping criteria for the algorithm, we run the Geweke diagnostic (Geweke, 1992) to examine the convergence of the Markov chain induced by the proposed Gibbs sampling algorithm. Specifically, we conduct the Geweke test by taking the first 10% and the last 50% part of the chain into account. Besides, the Gelman and Rubin’s statistic (Gelman and Rubin, 1992; Brooks and Gelman, 1998) is also computed to check the convergence of multiple chains from the overdispersed starting points. As suggested by Brooks and Gelman (1998), the convergence is reached if the Gelman-Rubin convergence diagnostic value is less than 1.2 for all model parameters. According to our comprehensive numerical experience, we need to run the Gibbs sampling algorithm for a total number of  $N = 500,000$  iterations to ensure the Gelman-Rubin convergence diagnostic values are less than 1.2 and  $p$ -values of the Geweke test statistic for all model parameters  $\beta$ ,  $\eta$ ,  $\mu$  and  $\sigma$  are above the pre-specified threshold  $\delta = 0.05$  under all the settings. We then discard the first  $N_0 = 100,000$  iterations as burn-in. After burn-in, we thin the chain by setting the value of thinning as 100 to reduce the autocorrelation of posterior samples. As such, a chain of 4,000 iterations is obtained after burn-in and thinning.

However, we caution that the mixing property of the induced chain might be still poor, even though they have passed the Geweke test and their Gelman-Rubin convergence diagnostic values are less than 1.2 (Gong and Flegal, 2016). To illustrate that, we present a realization of the convergence diagnostic plots of the chain for model parameters  $\beta$ ,  $\eta$ ,  $\mu$  and  $\sigma$  in Figure 2. As can be seen, the trace plots and autocorrelation plots for parameters  $\beta$  and  $\eta$  show the inadequate mixing property of the chain and the high level of autocorrelation among samples. To overcome

this, more iterations are required, which, however, renders the Bayesian estimation procedure even more computationally cumbersome. Alternative strategies such as other carefully selected proposal functions for the M-H algorithm, the adaptive Metropolis sampler (Haario et al., 1999, 2001) and the delayed rejection mechanism (Tierney and Mira, 1999; Green and Mira, 2001) can be considered in the future to improve the mixing efficiency of the chain, and thus the precision of the Bayesian parameter estimation can be improved.

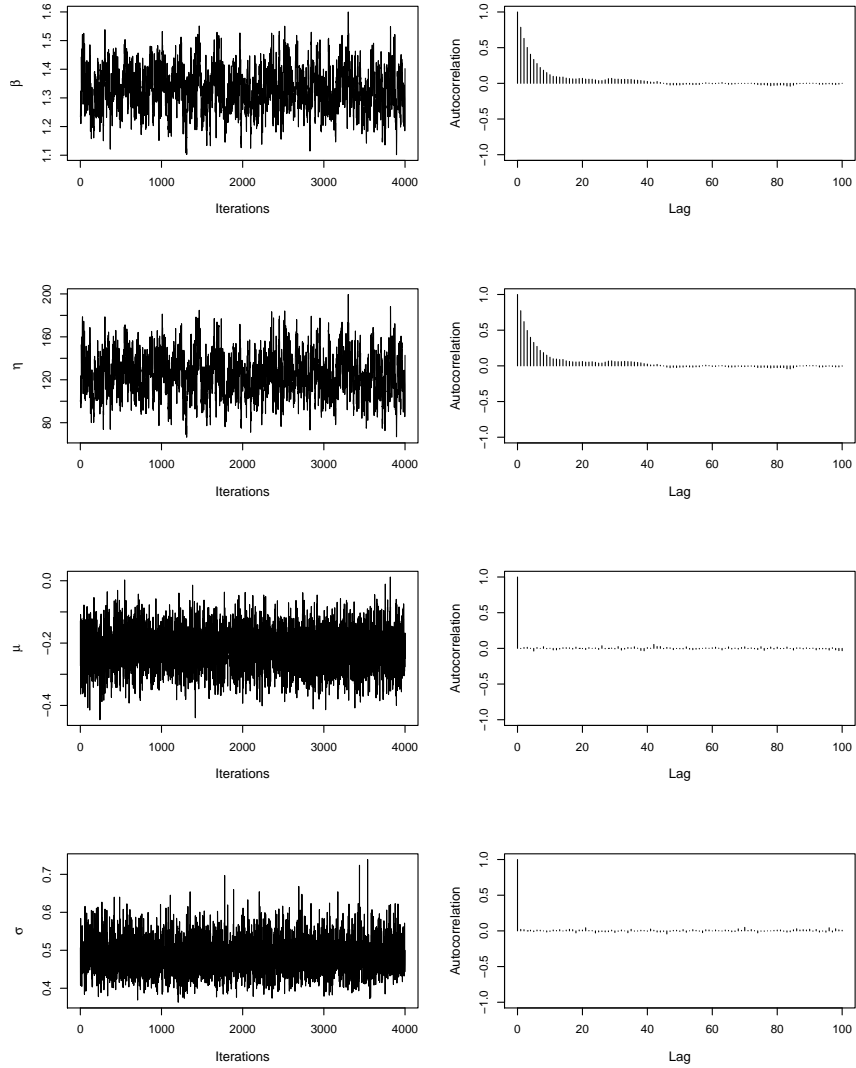

Figure 2: Trace plots (left) and corresponding autocorrelation plots (right) of the chain after burn-in and thinning, under the PLP-Lognormal model setting with  $(\beta, \eta, \mu, \sigma) = (1.25, 100, -0.2, 0.5)$ ,  $n = 30$  and  $\Delta = 630$ .

## S2 Technical Notes

### S2.1 Intensity of the failure process

In this section, we add some more discussions on the system ROCOF. Let  $\mathcal{F}_t$  be the filtration (i.e. the history just up to time  $t$ ) of the process up to and including time  $t$ . For the filtration, we have  $\mathcal{F}_{t-} = \bigcup_{s < t} \mathcal{F}_s$ . The assumption that two failure events cannot occur at exactly the same time is plausible in most settings and is also retained in our study. The intensity for the failure process is defined formally as

$$\lambda(t \mid \mathcal{F}_{t-}) = \lim_{\Delta t \rightarrow 0} \frac{\Pr\{\Delta N(t) = 1 \mid \mathcal{F}_{t-}\}}{\Delta t}. \quad (12)$$

The system ROCOF  $\lambda(t)$  in Equation (1) of the paper is accordingly defined by  $\lambda(t \mid \mathcal{F}_{t-})$ .

### S2.2 Product integral

In this section, we clarify the product integral, i.e., the term  $\prod_{u \in [L, R]} \{\lambda(u)\}^{dN(u)}$  in Equation (2) of the paper. Consider a generic system that follows the defined failure model in the paper. Suppose  $m$  failures occur in the observation window  $[L, R]$  denoted by an ordered collection  $\{t_l : 1 \leq l \leq m\}$ ,  $m = N(R)$ . Consider partitions  $L = u_0 < u_1 < \dots < u_S = R$  of the observation window  $[L, R]$  and define  $\Delta u_s = u_{s+1} - u_s$ ,  $s = 0, 1, \dots, S$ , where  $u_{S+1} = u_S^+$ . As introduced in Section 2.6 in [Andersen et al. \(2012\)](#), the term  $\prod_{u \in [L, R]} \{\lambda(u)\}^{dN(u)}$  in Equation (2) of the paper is actually a limit of approximating the finite product  $\lim_{S \rightarrow \infty} \prod_{s=0}^S \{\lambda(u_s)\}^{\Delta N(u_s)}$ . As  $S \rightarrow \infty$  and  $\Delta u_s \rightarrow 0$ , the  $m$  intervals that contain the event times  $t_1, \dots, t_m$  have  $\Delta N(u_s) = 1$ ; for all others  $\Delta N(u_s) = 0$ . Hence, we have

$$\begin{aligned} & \prod_{u \in [L, R]} \{\lambda(u)\}^{dN(u)} \\ &= \lim_{S \rightarrow \infty} \prod_{s=0}^S \{\lambda(u_s)\}^{\Delta N(u_s)} \\ &= \prod_{l=1}^m \lambda(t_l). \end{aligned}$$

According to Theorem 2.1 in [Cook et al. \(2007\)](#), the probability density of the observed failure events  $\{t_l : 1 \leq l \leq m\}$  for the failure process with intensity (12) over the observation window

$[L, R]$  is

$$\prod_{l=1}^m \lambda(t_l) \cdot \exp \left\{ - \int_L^R \lambda(u) du \right\}. \quad (13)$$

With the above settings, the likelihood function in Equation (2) of the paper is obtained by integrating  $\mathbf{A}$  in (13) out:

$$L(\boldsymbol{\theta}; \mathbf{D}) = \underbrace{\int_0^\infty \cdots \int_0^\infty}_{\lfloor R/\Delta \rfloor} \exp(\Lambda(L) - \Lambda(R)) \prod_{l=1}^m \lambda(t_l) dF_A(a_1) \cdots dF_A(a_{\lfloor R/\Delta \rfloor}).$$

### S2.3 Complete-data log-likelihood function

This section presents detailed derivations to obtain complete-data log-likelihood function. Consider a generic system. Denote  $\mathbf{D} = \{L, R, N(t) : t \in [L, R]\}$  as the observed data and  $\mathbf{A} = \{A_k : k\Delta \leq R\}$  as the set of unobserved PM random effects. When  $n$  independent systems are available, the recurrent failure data from  $n$  systems are thus  $\mathbb{D} = \{\mathbf{D}_i : i = 1, 2, \dots, n\}$ , and  $\mathbb{A} = \{\mathbf{A}_i : i = 1, 2, \dots, n\}$  is the collection of all the PM random effects. Based on the complete data  $\mathbb{C} = \mathbb{D} \cup \mathbb{A}$ , the complete-data likelihood function is given by

$$L(\boldsymbol{\theta}; \mathbb{C}) = \prod_{i=1}^n L(\boldsymbol{\theta}; \mathbf{D}_i, \mathbf{A}_i) = \prod_{i=1}^n \left[ \exp(\Lambda(L_i) - \Lambda(R_i)) \prod_{t \in [L_i, R_i]} \lambda_i(t)^{dN_i(t)} \prod_{k=1}^{\lfloor R_i/\Delta \rfloor} f_A(a_{ik}) \right].$$

Therefore, the complete-data log-likelihood function  $\ell(\boldsymbol{\theta}; \mathbb{C})$  in Equation (3) of the paper is obtained by simply taking the log of the above equation.

### S2.4 Q-function

Detailed derivations to obtain the  $Q$ -function (i.e. Equation (4) of the paper) are given by

$$\begin{aligned} \mathbb{E} \left[ \ell(\boldsymbol{\theta}; \mathbb{C}) \mid \mathbb{D}, \boldsymbol{\theta}^{(j)} \right] &= \sum_{i=1}^n \mathbb{E} \left[ \ell(\boldsymbol{\theta}; \mathbf{D}_i, \mathbf{A}_i) \mid \mathbf{D}_i, \boldsymbol{\theta}^{(j)} \right] \\ &= \sum_{i=1}^n \underbrace{\int_0^\infty \cdots \int_0^\infty}_{\lfloor R_i/\Delta \rfloor} \ell(\boldsymbol{\theta}; \mathbf{D}_i, \mathbf{A}_i) f_{\mathbf{A}_i}(\mathbf{a}_i \mid \mathbf{D}_i, \boldsymbol{\theta}^{(j)}) da_{i1} \cdots da_{i\lfloor R_i/\Delta \rfloor}, \end{aligned}$$

where the first equality follows from the independence among  $n$  systems and  $f_{\mathbf{A}_i}(\mathbf{a}_i \mid \mathbf{D}_i, \boldsymbol{\theta}^{(j)})$  is the conditional PDF of random effects (i.e. Equation (5) of the paper) , which can be expressed as

$$f_{\mathbf{A}_i}(\mathbf{a}_i \mid \mathbf{D}_i, \boldsymbol{\theta}^{(j)}) = \frac{L(\boldsymbol{\theta}^{(j)}; \mathbf{D}_i, \mathbf{A}_i)}{L(\boldsymbol{\theta}^{(j)}; \mathbf{D}_i)}.$$

### S3 The Non-periodic or Condition-based PM Setting

In this section, we discuss the applicability of the proposed method to the non-periodic PM setting or the condition-based PM setting. In keeping with the notation in [Doyen and Gaudoin \(2006\)](#) and [Doyen and Gaudoin \(2011\)](#), we define the failure process  $N(t)$  that counts failures, the PM counting process  $M(t)$  that counts PM actions and  $K(t)$  that counts both failures and PM actions over  $[0, t]$ . Denote  $\{C_i\}_{i \geq 0}$  the failure and PM time sequence ( $C_0 = 0$ ). Denote  $\mathcal{F}_t, t \geq 0$ , as the natural filtration generated by the history of the processes  $N(t)$  and  $M(t)$  and the hypothetical observation of PM random effects  $\{A_j\}_{j \geq 1}$  up to and including time  $t$ :  $\mathcal{F}_t = \sigma(\{N(s), M(s), A_{M(s)}\}_{0 \leq s \leq t})$ . For the filtration, let  $\mathcal{F}_{t-} = \bigcup_{s < t} \mathcal{F}_s$ .

- *Non-periodic PM policy.*

Consider a repairable system. The intensity for the failure process is defined by

$$\lambda(t \mid \mathcal{F}_{t-}) = \lim_{\Delta t \rightarrow 0} \frac{\Pr\{\Delta N(t) = 1 \mid \mathcal{F}_{t-}\}}{\Delta t}.$$

Next, when we consider a non-periodic time-based PM program to mitigate the risk of failures, the PM time sequence is also predictable with respect to the filtration, i.e., the next PM time is a deterministic function of the history of the PM and failure processes ([Doyen and Gaudoin, 2011](#)). Following the model setting in the paper, we consider the minimal repair assumption and explicitly model the effect of PM as a multiplicative random effect on ROCOFs. Thus, for the non-periodic PM policy, the system ROCOF is formulated as

$$\lambda(t) \triangleq \lambda(t \mid \mathcal{F}_{t-}) = \prod_{j=1}^{M(t-)} A_j \lambda_0(t),$$



where random effects  $A_j$ ,  $j = 1, \dots, M(t^-)$ , are assumed to be i.i.d. nonnegative random variables representing the effects of each PM action.

- *Condition-based PM policy.*

Next, we consider a repairable system under a condition-based PM program. In this case, the PM time sequence is not predictable with respect to the filtration, i.e., PM times are not deterministic. The intensity function for the failure process is defined by

$$\lambda^N(t | \mathcal{F}_{t-}) = \lim_{\Delta t \rightarrow 0} \frac{\Pr\{\Delta N(t) = 1 | \mathcal{F}_{t-}\}}{\Delta t}.$$

The intensity function for the condition-based PM process is defined by

$$\lambda^M(t | \mathcal{F}_{t-}) = \lim_{\Delta t \rightarrow 0} \frac{\Pr\{\Delta M(t) = 1 | \mathcal{F}_{t-}\}}{\Delta t}.$$

The failure and PM intensities completely characterize the failure and PM processes. The competing risks approach developed in the context of maintenance is commonly used to derive the failure and PM intensities (Doyen and Gaudoin, 2006; Dijoux and Gaudoin, 2009). To use the competing risks approach, we introduce the concept of risk variables. After the  $k$ th PM or repair action, the time to the next failure (i.e., the next repair action) is a random variable  $Z_{k+1}$ . However, the failure can be avoided by a condition-based PM action at a random time,  $Y_{k+1}$ . The time until the next failure or PM is  $W_{k+1} = \min(Z_{k+1}, Y_{k+1})$ . The random variables  $Y_{k+1}$  and  $Z_{k+1}$  are called the risk variables.

The subhazard rates of the first failure and PM risk variables  $Z_1$  and  $Y_1$  are accordingly defined as below (Doyen and Gaudoin, 2006):

$$\begin{aligned} \lambda_c(w) &= \lim_{\Delta w \rightarrow 0} \frac{1}{\Delta w} \Pr(w < Z_1 \leq w + \Delta w, Z_1 < Y_1 | W_1 > w), \\ \lambda_p(w) &= \lim_{\Delta w \rightarrow 0} \frac{1}{\Delta w} \Pr(w < Y_1 \leq w + \Delta w, Y_1 \leq Z_1 | W_1 > w). \end{aligned} \tag{14}$$

Following the generalized virtual age model in Doyen and Gaudoin (2006), we define a sequence of random variables  $\{V_k\}_{k \geq 1}$ , with  $V_0 = 0$ , called effective ages. We assume that after the  $k$ th failure or PM the risk variables  $Y_{k+1}$  and  $Z_{k+1}$  behave like the risk variables of a new

system, never maintained before  $V_k$ . Under the assumption, the connections between failure and PM intensities and subhazard rates are established by the following equations:

$$\begin{aligned}\lambda^N(t \mid \mathcal{F}_{t-}) &= \lambda_c(V_{K(t-)} + t - C_{K(t-)}), \\ \lambda^M(t \mid \mathcal{F}_{t-}) &= \lambda_p(V_{K(t-)} + t - C_{K(t-)}),\end{aligned}\tag{15}$$

where  $\lambda_c(\cdot)$  and  $\lambda_p(\cdot)$  are the subhazard rates of the first latent repair and PM times, respectively, defined in (14). As with our proposed model for the periodic PM setting, we can still consider the minimal repair assumption and explicitly model the PM random effects, which accounts for the potential PM adverse effects as well. By blending the idea of  $\text{ARA}_\infty$  model from [Doyen and Gaudoin \(2004\)](#), we have

$$V_{K(t)} = \begin{cases} A_{M(t)}(V_{K(t)-1} + C_{K(t)} - C_{K(t)-1}), & dM(t) = 1, \\ V_{K(t)-1} + C_{K(t)} - C_{K(t)-1}, & dM(t) = 0, \end{cases}$$

where random effects  $A_{M(t)}$  are assumed to be i.i.d. nonnegative random variables representing the effects of each PM action and  $dM(t) = \lim_{\Delta t \rightarrow 0} M((t + \Delta t)^-) - M(t^-)$ .

We next discuss the modeling method on the dependence between PM and repair actions. It is sufficient to express the dependence between the risk variables  $Y_1$  and  $Z_1$  since the failure and PM intensities are determined by them, as shown in (15). Though the independent risks assumption is common in competing risks approach literature ([Cox, 1959](#); [Gail, 1975](#); [Crowder, 2001](#)), it is not realistic since PM and repair actions are linked through the degradation process. To characterize the dependence between PM and repair actions, the dependent competing risks model, e.g., the alert-delay model, is introduced in [Dijoux and Gaudoin \(2009\)](#). To be specific, the alert-delay model assumes that the link between the PM and repair action risk variables is as follows:

$$Y_1 = pZ_1 + \mathcal{E},$$

where  $p \in [0, 1]$  and  $Z_1$  and  $\mathcal{E}$  are two independent positive random variables. Commonly used distributions for  $Z_1$  and  $\mathcal{E}$  are the exponential distribution. The identifiability of the alert-

delay model is also proved for  $p \neq 1$  in [Dijoux and Gaudoin \(2009\)](#). Under this dependence assumption, the subhazard rates are readily derived, and thus the failure and PM intensities can be computed by (15). The detailed derivations can be found in [Dijoux and Gaudoin \(2009\)](#).

## S4 Gain of the quasi-Monte Carlo method

To illustrate the gain of the quasi-Monte Carlo method, we carefully investigate the Monte Carlo method and quasi-Monte Carlo method from both theoretical and empirical perspectives, as detailed below.

- *Theoretical perspective.* When using  $N$  samples, the Monte Carlo integration method yields a probabilistic error bound of  $O(N^{-1/2})$  independent of dimensions ([Niederreiter, 1992](#); [Caffisch, 1998](#)). The quasi-Monte Carlo integration method can yield a deterministic error bound of  $O(N^{-1}(\log N)^d)$ , where  $d$  is the dimension of the integral ([Caffisch, 1998](#)). To be exact, this is the upper bound of the error. The convergence rate of the quasi-Monte Carlo integration method is generally faster than that theoretical bound ([Asmussen and Glynn, 2007](#)).

The accuracy of the quasi-Monte Carlo method generally increases faster than Monte Carlo method as  $N$  increases. However, this advantage should be checked judiciously since it is only guaranteed if  $N$  is large enough and the dimension of the integral  $d$  is not large. It is widely believed that quasi-Monte Carlo method is applicable to problems in a dimension of moderate size, say, for  $d < 15$  ([Wang and Fang, 2003](#)). To check that, the dimension of each integral in Equation (4) of the paper (i.e.  $Q$ -function) is less than 10 in our studies. As such, with the carefully chosen sample size  $N$ , the advantage of the faster convergence rate of the quasi-Monte Carlo method can be well retained in our studies.

- *Empirical perspective.* To illustrate the gain of quasi-Monte Carlo method, we conduct simulation studies to check the average calculation time of Monte Carlo EM (MCEM) and quasi-Monte Carlo EM (QMCEM) algorithms. We consider the power-law baseline ROCOF  $\lambda_0(t) = (\beta/\eta)(t/\eta)^{\beta-1}$  with  $(\beta, \eta) = (1.25, 100)$  and Lognormal( $\mu, \sigma^2$ ) PM random effect with  $(\mu, \sigma) \in \{(-1/5, 1/2), (-1/8, 1/2), (-1/10, 1/2)\}$  in the simulation. Two levels of the

Table 5: The average calculation time (in seconds) of Monte Carlo EM (MCEM) and quasi-Monte Carlo EM (QMCEM) algorithms under the power-law baseline ROCOF and lognormal PM random effect setting.

| $n$ | $(\beta, \eta, \mu, \sigma)$ | Method          | $\Delta = 365$ | $\Delta = 540$ |
|-----|------------------------------|-----------------|----------------|----------------|
| 30  | $(1.25, 100, -1/5, 1/2)$     | MCEM algorithm  | 1554.39        | 1063.51        |
|     |                              | QMCEM algorithm | 1482.60        | 1215.37        |
|     | $(1.25, 100, -1/8, 1/2)$     | MCEM algorithm  | 3197.65        | 1404.68        |
|     |                              | QMCEM algorithm | 2354.67        | 1270.73        |
|     | $(1.25, 100, -1/10, 1/2)$    | MCEM algorithm  | 4719.59        | 1220.60        |
|     |                              | QMCEM algorithm | 3706.83        | 1324.08        |
| 45  | $(1.25, 100, -1/5, 1/2)$     | MCEM algorithm  | 1925.21        | 1155.26        |
|     |                              | QMCEM algorithm | 1561.40        | 1354.13        |
|     | $(1.25, 100, -1/8, 1/2)$     | MCEM algorithm  | 3205.59        | 1388.43        |
|     |                              | QMCEM algorithm | 2627.82        | 1279.86        |
|     | $(1.25, 100, -1/10, 1/2)$    | MCEM algorithm  | 5361.79        | 1366.29        |
|     |                              | QMCEM algorithm | 3992.40        | 1537.02        |
| 60  | $(1.25, 100, -1/5, 1/2)$     | MCEM algorithm  | 2211.40        | 1227.00        |
|     |                              | QMCEM algorithm | 1657.05        | 1471.24        |
|     | $(1.25, 100, -1/8, 1/2)$     | MCEM algorithm  | 3171.34        | 1363.68        |
|     |                              | QMCEM algorithm | 3066.79        | 1306.54        |
|     | $(1.25, 100, -1/10, 1/2)$    | MCEM algorithm  | 6075.84        | 1481.73        |
|     |                              | QMCEM algorithm | 4276.59        | 1622.46        |

PM time interval are considered:  $\Delta \in \{365, 540\}$ . The sample size design and observation window design are the same as in the Section 5.1 of the paper. All computations were conducted on an Intel(R) Xeon(R) CPU E5-2698 v4 (2.20 GHz). The results are summarized in Table 5. As can be seen, the average calculation time of MCEM algorithm is generally longer than QMCEM algorithm under different settings.

In addition, to further illustrate the convergence rate in Monte Carlo method and quasi-Monte Carlo method, we next compute the relative error of the Monte Carlo and quasi-Monte Carlo approximations of the  $Q$ -function,  $|Q^*(\boldsymbol{\theta} \mid \tilde{\boldsymbol{\theta}}) - Q(\boldsymbol{\theta} \mid \tilde{\boldsymbol{\theta}})|/Q(\boldsymbol{\theta} \mid \tilde{\boldsymbol{\theta}})$ , where  $Q^*(\boldsymbol{\theta} \mid \tilde{\boldsymbol{\theta}})$  denotes the approximations of  $Q$ -function. For example, we plot the relative approximation error as a function of the sample size  $N$  from  $10^1$  to  $10^4$  by considering the power-law baseline ROCOF and lognormal PM random effect with  $\boldsymbol{\theta} = \tilde{\boldsymbol{\theta}} = (\beta, \eta, \mu, \sigma) = (1.25, 100, -1/5, 1/2)$ , PM time interval  $\Delta = 365$ , and sample size  $n = 30$ . The results are presented in Figure 3. As can be

seen, the relative approximation error of the Monte Carlo method decreases as the increase of sample size  $N$ , roughly at a rate of  $1/\sqrt{N}$ , and the quasi-Monte Carlo method is generally better at all sample sizes and appears to show a faster convergence rate.

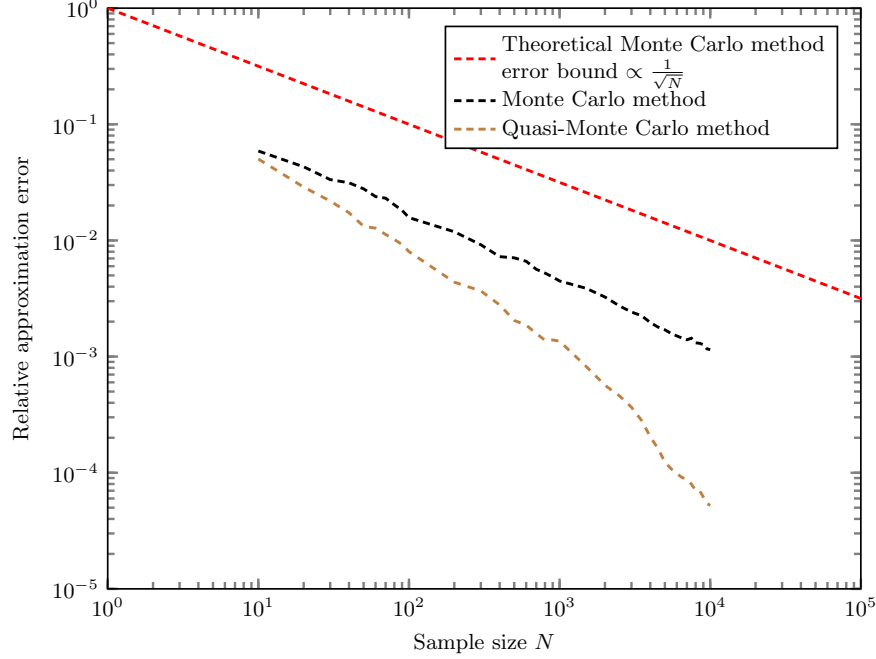

Figure 3: Relative approximation error as a function of the sample size  $N$  from  $10^1$  to  $10^4$ .

## S5 Martingale residuals

In this section, we introduce the concept of martingale residuals. Denote  $\Lambda = (\Lambda(t))_{t \geq 0}$  as the cumulative intensity process of the counting process  $N = (N(t))_{t \geq 0}$ , such that  $\Lambda(t) = \int_0^t \lambda(s) ds$  and  $\lambda(s)$  is the intensity. The counting process martingale is defined by  $M(t) = N(t) - \Lambda(t)$ .

Consider a generic repairable system that follows the defined failure model in the paper. We denote  $\{t_l : 1 \leq l \leq m\}$  as the ordered collection of its failure time epochs over the observation window  $[L, R]$ , where  $m = N(R)$  (i.e., the number of failures observed from the system) and  $t_0 \triangleq L$ . With the assumed model, the failure process follows a Poisson process after conditioning on the frailties (i.e., PM random effects) and the observation windows. By plugging in parameter estimates, the corresponding martingale residuals are obtained as  $\widehat{M}(t_l) = N(t_l) - \Lambda(t_l; \hat{\theta}, \hat{\mathbf{A}})$ ,  $1 \leq l \leq m$ . Based on the martingale residuals, we can simply adopt the Kolmogorov-Smirnov (KS) type test statistic

(see also [Chauvel et al. \(2016\)](#)) to evaluate the proximities between the observed data and the estimated models, which is defined as

$$\begin{aligned} \text{KS}(\hat{\boldsymbol{\theta}}, \hat{\mathbf{A}}) &= \sup_{1 \leq l \leq m} \left| \widehat{M}(t_l) \right| \\ &= \sup_{1 \leq l \leq m} \left| N(t_l) - \Lambda(t_l; \hat{\boldsymbol{\theta}}, \hat{\mathbf{A}}) \right|. \end{aligned}$$

As with Section 4 of the paper, a parametric bootstrap method ([Efron and Tibshirani, 1994](#)) can be next employed to compute the quantiles of the above test statistic distribution.

## S6 Additional Figures and Tables

### S6.1 Additional parameter estimation results

As indicated in Section 5.1 of the paper, when using `optim()` in R ([R Core Team, 2020](#)), the constraints on the range of parameters need to be first specified. The range of parameters in the baseline ROCOF is as below:

- For *power-law process*  $\lambda_0(t) = (\beta/\eta) (t/\eta)^{\beta-1}$ , we have parameters  $\eta, \beta > 0$ .
- For *log-linear law process*  $\lambda_0(t) = \exp(\eta + \beta t)$ , we have parameters  $\eta, \beta \in \mathbb{R}$ .

The range of parameters in the distribution of PM random effects is as below:

- For the  $\text{Gamma}(\alpha, \nu)$  random effect, we have the shape parameter  $\alpha > 0$  and the rate parameter  $\nu > 0$ .
- For the  $\text{Lognormal}(\mu, \sigma^2)$  random effect, we have parameters  $\mu \in \mathbb{R}$  and  $\sigma > 0$ .

The additional parameter estimation results under PLP-Lognormal, PLP-Gamma, LLP-Lognormal and LLP-Gamma model settings are presented in Tables 6-21. Besides, we compute the relative estimation error  $(\hat{\boldsymbol{\theta}} - \boldsymbol{\theta})/\boldsymbol{\theta}$  in each replication, and then present box plots of the relative estimation error under the PLP-Lognormal model to check how the estimated parameters spread out. The box plots of the relative estimation error based on the 1,000 replications are plotted in Figures 4-7. As

demonstrated by the figures, the relative estimation error generally decreases as  $n$  increases under the PLP-Lognormal model setting. Overall, the performance of the EM algorithm in parameter estimations is satisfactory under different settings.

## S6.2 Numerical issues

In this section, we discuss the numerical instability problems, e.g., arithmetic overflows, which arise when considering the log-linear baseline model. As shown in Tables 14-21, when examining the log-linear law baseline ROCOF model, the true magnitudes of the parameters  $\beta$  and  $\eta$  are set to be 0.0005 and  $-4.5$ , respectively. The numerical problems may arise due to huge differences in scales of the parameters. For example, when using quasi-Newton type method in `optim()`, the convergence can be compromised due to the ill-conditioned problem on the Hessian matrix of the  $Q$ -function. Besides, similar problems can also arise when computing the inverse of the Hessian matrix of the  $Q$ -function to obtain confidence intervals. To overcome these hurdles, we resort to the built-in control parameter “parscale” in `optim()` to rescale the parameters so that unit change of rescaled parameters have nearly the same impact on the objective function.

In addition, according to our numerical experience, the numerical stability issues seem to arise more frequently in the quasi-Newton BFGS method than the Nelder-Mead method. This is because BFGS method performs a line search in the direction of the gradient, which can lead to extreme parameter values in the line search step and cause numerical issues. Luckily, we note that the `optim()` can generally handle it without generating errors even though the objective function returns an “Inf” or “NaN” value. This built-in feature of the `optim()` in R (R Core Team, 2020) helps to maintain the numerical stability.

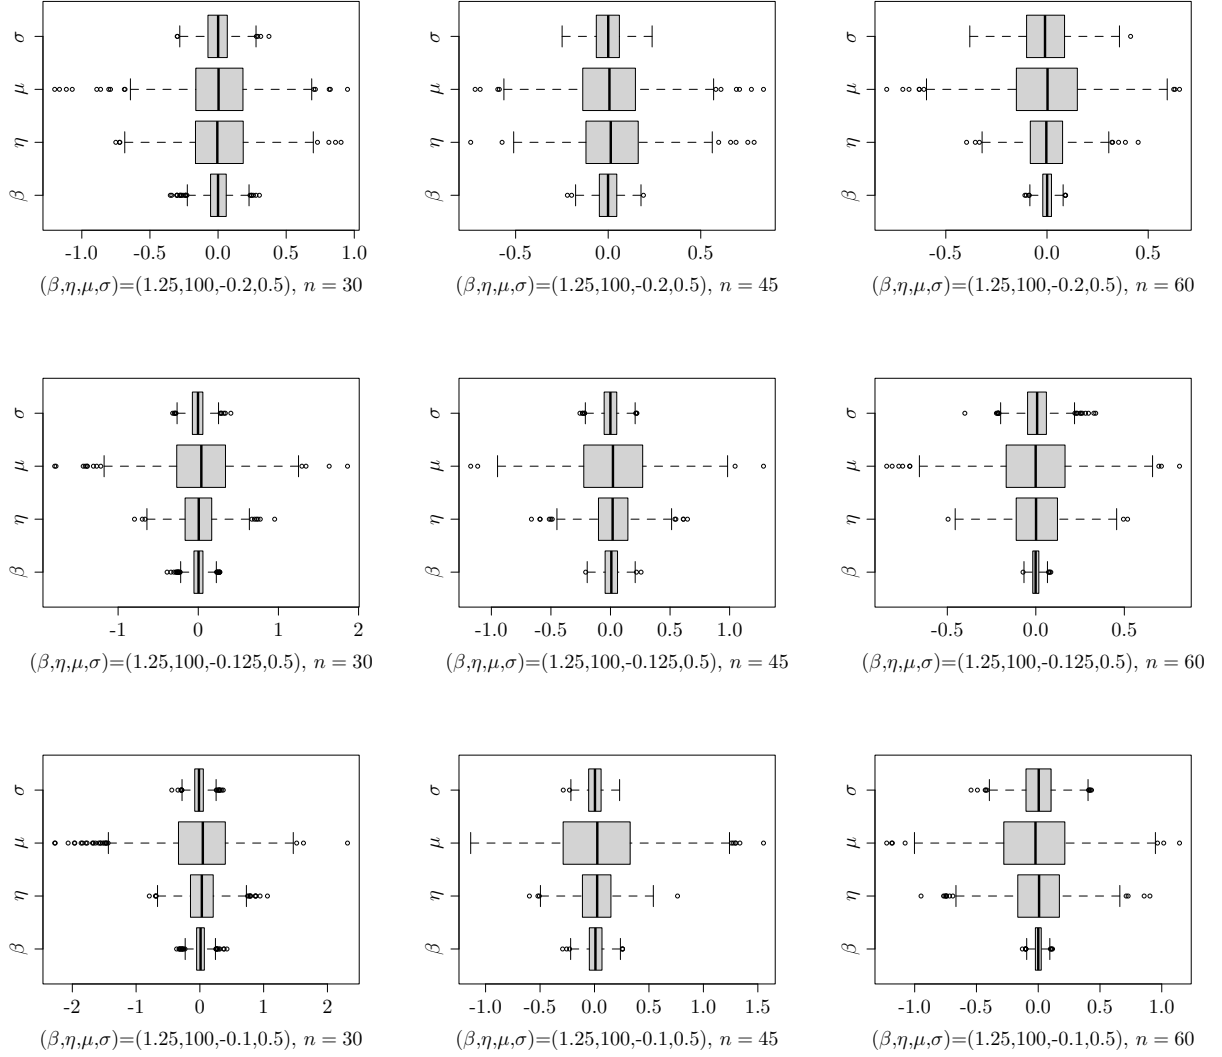

Figure 4: Box plots of the relative estimation error of  $\hat{\boldsymbol{\theta}} = (\hat{\beta}, \hat{\eta}, \hat{\mu}, \hat{\sigma})$ , under the PLP-Lognormal model with PM time interval  $\Delta = 365$ .



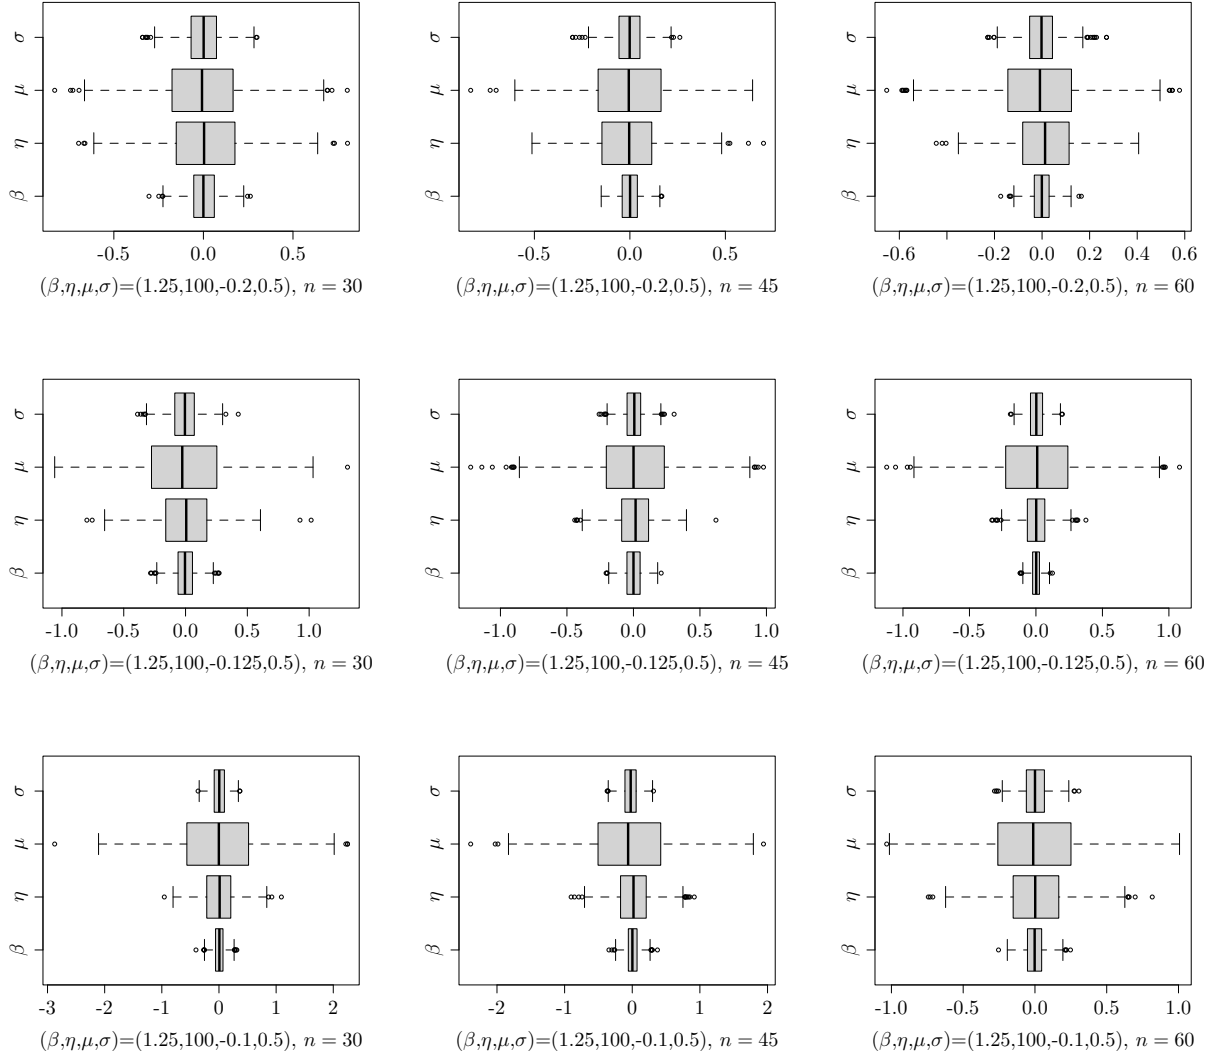

Figure 5: Box plots of the relative estimation error of  $\hat{\theta} = (\hat{\beta}, \hat{\eta}, \hat{\mu}, \hat{\sigma})$ , under the PLP-Lognormal model with PM time interval  $\Delta = 450$ .

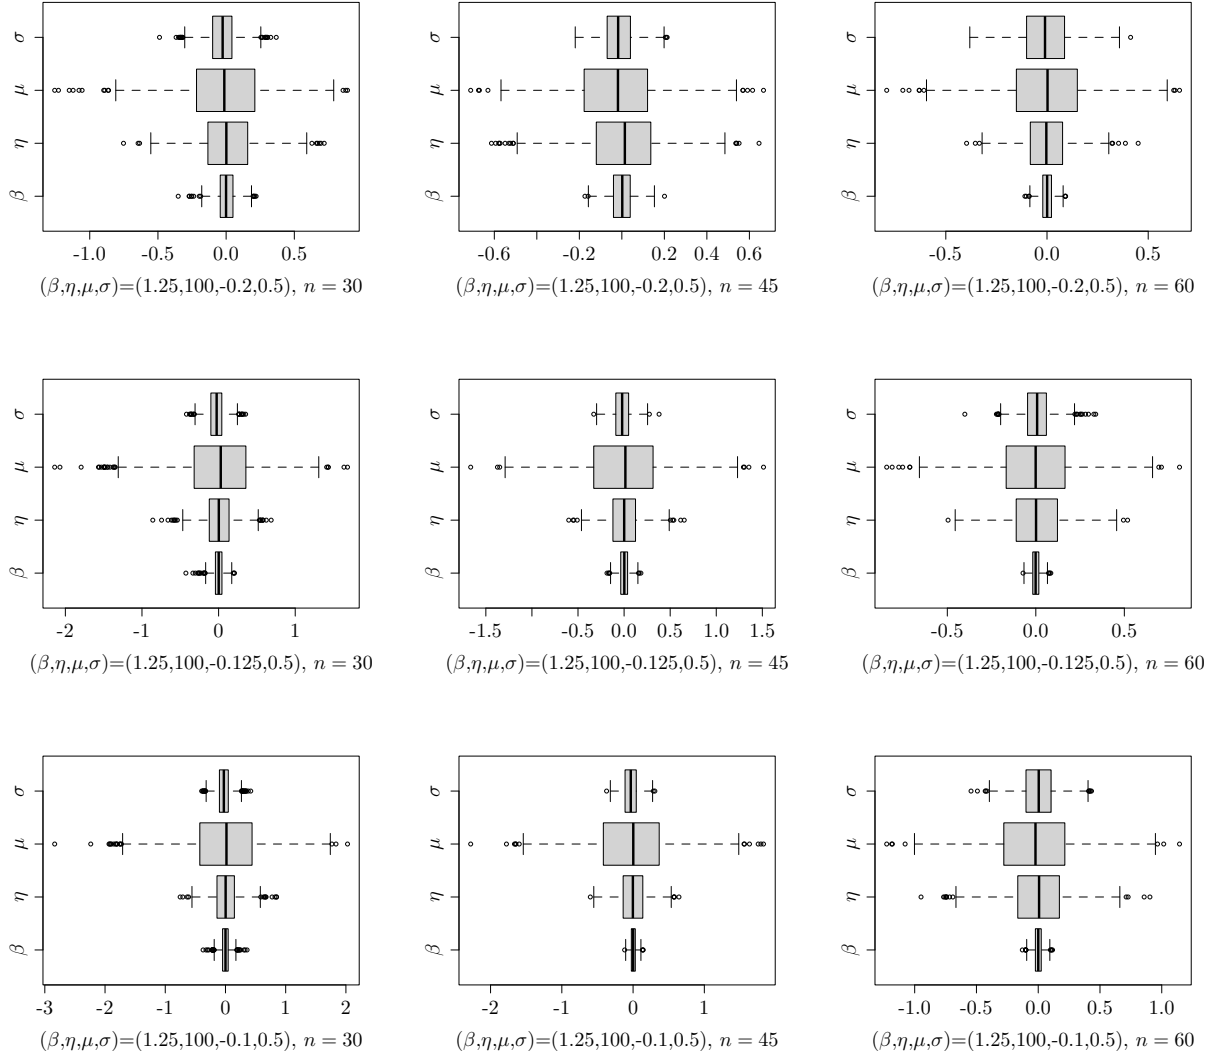

Figure 6: Box plots of the relative estimation error of  $\hat{\theta} = (\hat{\beta}, \hat{\eta}, \hat{\mu}, \hat{\sigma})$ , under the PLP-Lognormal model with PM time interval  $\Delta = 540$ .

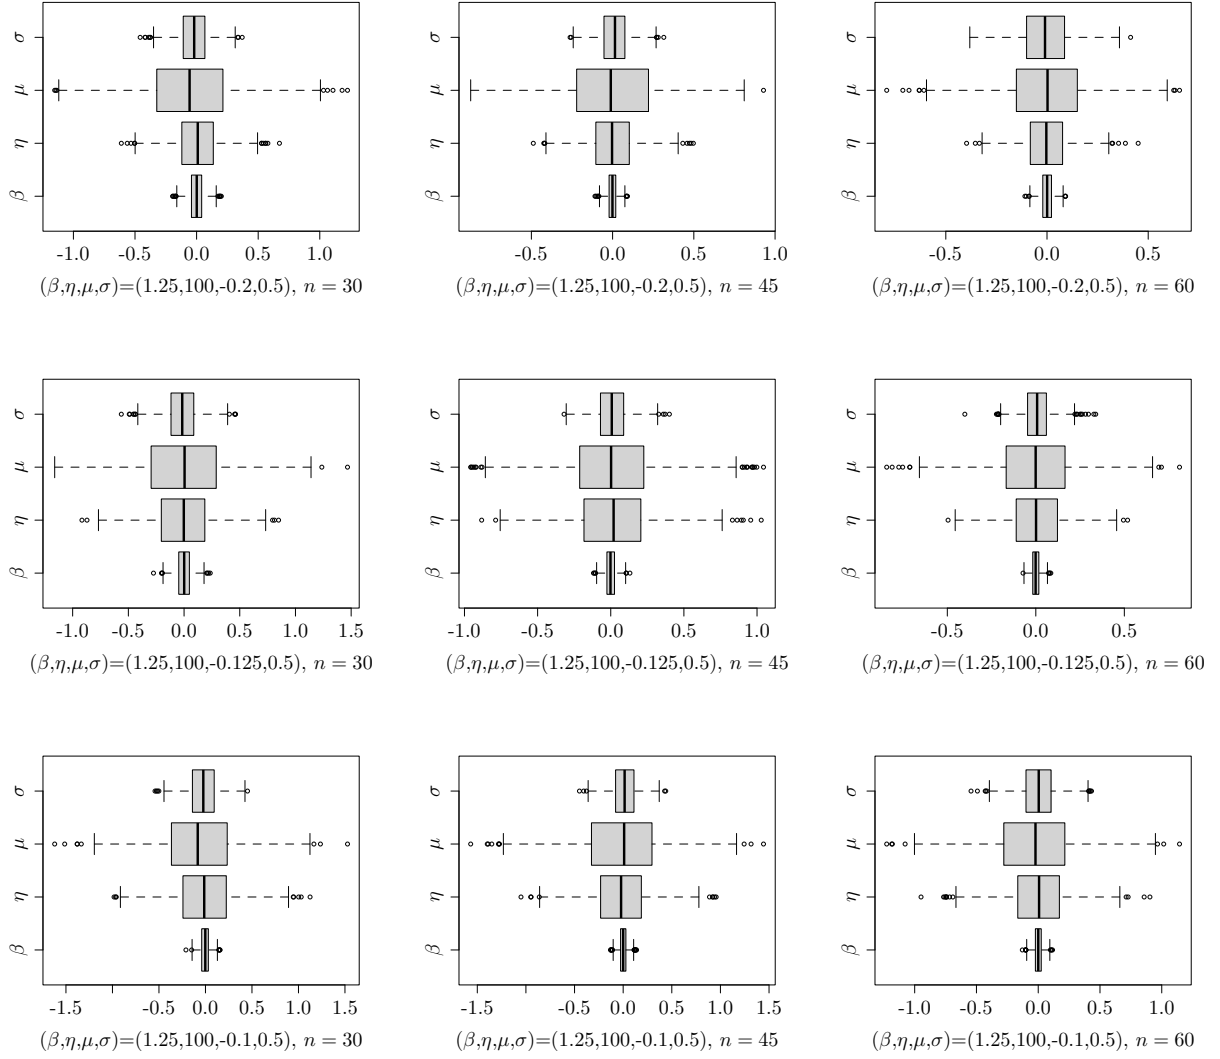

Figure 7: Box plots of the relative estimation error of  $\hat{\theta} = (\hat{\beta}, \hat{\eta}, \hat{\mu}, \hat{\sigma})$ , under the PLP-Lognormal model with PM time interval  $\Delta = 630$ .

Table 6: Biases and RMSEs of the MLE, the coverage probability (CP) of the 95% asymptotic confidence interval (CI) and 95% bootstrap confidence interval and average computation time (in seconds), computed based on 1,000 Monte Carlo replications, under the PLP-Lognormal model with the PM time interval:  $\Delta = 365$ .

| $n$ | $(\beta, \eta, \mu, \sigma)$ | Run time |                           | $\hat{\beta}$ | $\hat{\eta}$ | $\hat{\mu}$ | $\hat{\sigma}$ |
|-----|------------------------------|----------|---------------------------|---------------|--------------|-------------|----------------|
| 30  | (1.25, 100, $-1/5, 1/2$ )    | 1482.60  | bias ( $\times 10^{-2}$ ) | 0.145         | 156.898      | -0.086      | -0.019         |
|     |                              |          | RMSE                      | 0.115         | 26.084       | 0.053       | 0.051          |
|     |                              |          | CP (asymptotic CI)        | 0.930         | 0.941        | 0.955       | 0.977          |
|     |                              |          | CP (bootstrap CI)         | 0.938         | 0.949        | 0.957       | 0.973          |
|     | (1.25, 100, $-1/8, 1/2$ )    | 2354.67  | bias ( $\times 10^{-2}$ ) | 0.286         | 113.190      | -0.405      | -0.334         |
|     |                              |          | RMSE                      | 0.112         | 24.902       | 0.057       | 0.048          |
|     |                              |          | CP (asymptotic CI)        | 0.915         | 0.937        | 0.939       | 0.972          |
|     |                              |          | CP (bootstrap CI)         | 0.936         | 0.946        | 0.951       | 0.971          |
|     | (1.25, 100, $-1/10, 1/2$ )   | 3706.83  | bias ( $\times 10^{-2}$ ) | 1.265         | 334.40       | -0.200      | -0.704         |
|     |                              |          | RMSE                      | 0.126         | 26.776       | 0.061       | 0.050          |
|     |                              |          | CP (asymptotic CI)        | 0.906         | 0.914        | 0.911       | 0.946          |
|     |                              |          | CP (bootstrap CI)         | 0.931         | 0.937        | 0.936       | 0.961          |
| 45  | (1.25, 100, $-1/5, 1/2$ )    | 1561.40  | bias ( $\times 10^{-2}$ ) | 0.131         | 167.256      | -0.052      | 0.016          |
|     |                              |          | RMSE                      | 0.087         | 20.458       | 0.044       | 0.044          |
|     |                              |          | CP (asymptotic CI)        | 0.955         | 0.959        | 0.951       | 0.970          |
|     |                              |          | CP (bootstrap CI)         | 0.952         | 0.963        | 0.955       | 0.972          |
|     | (1.25, 100, $-1/8, 1/2$ )    | 2627.82  | bias ( $\times 10^{-2}$ ) | 0.195         | 166.732      | -0.262      | -0.278         |
|     |                              |          | RMSE                      | 0.095         | 19.142       | 0.045       | 0.039          |
|     |                              |          | CP (asymptotic CI)        | 0.925         | 0.950        | 0.949       | 0.965          |
|     |                              |          | CP (bootstrap CI)         | 0.933         | 0.948        | 0.957       | 0.977          |
|     | (1.25, 100, $-1/10, 1/2$ )   | 3992.40  | bias ( $\times 10^{-2}$ ) | 1.203         | 322.932      | -0.202      | 0.661          |
|     |                              |          | RMSE                      | 0.112         | 19.973       | 0.047       | 0.042          |
|     |                              |          | CP (asymptotic CI)        | 0.920         | 0.934        | 0.941       | 0.953          |
|     |                              |          | CP (bootstrap CI)         | 0.936         | 0.944        | 0.955       | 0.962          |
| 60  | (1.25, 100, $-1/5, 1/2$ )    | 1657.05  | bias ( $\times 10^{-2}$ ) | 0.119         | 260.642      | -0.031      | 0.055          |
|     |                              |          | RMSE                      | 0.074         | 17.664       | 0.036       | 0.032          |
|     |                              |          | CP (asymptotic CI)        | 0.959         | 0.957        | 0.956       | 0.973          |
|     |                              |          | CP (bootstrap CI)         | 0.954         | 0.958        | 0.965       | 0.970          |
|     | (1.25, 100, $-1/8, 1/2$ )    | 3066.79  | bias ( $\times 10^{-2}$ ) | 0.173         | 246.082      | -0.146      | 0.453          |
|     |                              |          | RMSE                      | 0.079         | 18.062       | 0.040       | 0.035          |
|     |                              |          | CP (asymptotic CI)        | 0.924         | 0.940        | 0.941       | 0.969          |
|     |                              |          | CP (bootstrap CI)         | 0.938         | 0.952        | 0.949       | 0.971          |
|     | (1.25, 100, $-1/10, 1/2$ )   | 4276.59  | bias ( $\times 10^{-2}$ ) | 1.471         | 352.213      | -0.462      | 0.737          |
|     |                              |          | RMSE                      | 0.083         | 18.606       | 0.037       | 0.035          |
|     |                              |          | CP (asymptotic CI)        | 0.918         | 0.931        | 0.942       | 0.963          |
|     |                              |          | CP (bootstrap CI)         | 0.932         | 0.941        | 0.959       | 0.960          |

Table 7: Biases and RMSEs of the MLE, the coverage probability (CP) of the 95% asymptotic confidence interval (CI) and 95% bootstrap confidence interval and average computation time (in seconds), computed based on 1,000 Monte Carlo replications, under the PLP-Lognormal model with the PM time interval:  $\Delta = 450$ .

| $n$ | $(\beta, \eta, \mu, \sigma)$ | Run time |                           | $\hat{\beta}$ | $\hat{\eta}$ | $\hat{\mu}$ | $\hat{\sigma}$ |
|-----|------------------------------|----------|---------------------------|---------------|--------------|-------------|----------------|
| 30  | (1.25, 100, -1/5, 1/2)       | 1346.54  | bias ( $\times 10^{-2}$ ) | 0.142         | 41.868       | -0.171      | 0.086          |
|     |                              |          | RMSE                      | 0.106         | 22.942       | 0.054       | 0.053          |
|     |                              |          | CP (asymptotic CI)        | 0.954         | 0.952        | 0.938       | 0.959          |
|     |                              |          | CP (bootstrap CI)         | 0.957         | 0.949        | 0.952       | 0.963          |
|     | (1.25, 100, -1/8, 1/2)       | 1853.72  | bias ( $\times 10^{-2}$ ) | 0.093         | 55.931       | 0.087       | -0.077         |
|     |                              |          | RMSE                      | 0.115         | 24.651       | 0.047       | 0.058          |
|     |                              |          | CP (asymptotic CI)        | 0.952         | 0.961        | 0.963       | 0.955          |
|     |                              |          | CP (bootstrap CI)         | 0.956         | 0.958        | 0.967       | 0.958          |
|     | (1.25, 100, -1/10, 1/2)      | 1452.41  | bias ( $\times 10^{-2}$ ) | 0.893         | 113.262      | 0.323       | 0.431          |
|     |                              |          | RMSE                      | 0.125         | 31.256       | 0.078       | 0.062          |
|     |                              |          | CP (asymptotic CI)        | 0.931         | 0.940        | 0.923       | 0.948          |
|     |                              |          | CP (bootstrap CI)         | 0.944         | 0.947        | 0.952       | 0.965          |
| 45  | (1.25, 100, -1/5, 1/2)       | 1622.76  | bias ( $\times 10^{-2}$ ) | 0.135         | 52.633       | 0.166       | -0.075         |
|     |                              |          | RMSE                      | 0.072         | 18.453       | 0.047       | 0.042          |
|     |                              |          | CP (asymptotic CI)        | 0.947         | 0.948        | 0.941       | 0.953          |
|     |                              |          | CP (bootstrap CI)         | 0.949         | 0.948        | 0.955       | 0.947          |
|     | (1.25, 100, -1/8, 1/2)       | 2341.74  | bias ( $\times 10^{-2}$ ) | 0.090         | 34.931       | -0.062      | 0.059          |
|     |                              |          | RMSE                      | 0.086         | 15.144       | 0.044       | 0.039          |
|     |                              |          | CP (asymptotic CI)        | 0.947         | 0.955        | 0.959       | 0.961          |
|     |                              |          | CP (bootstrap CI)         | 0.953         | 0.959        | 0.951       | 0.949          |
|     | (1.25, 100, -1/10, 1/2)      | 1789.68  | bias ( $\times 10^{-2}$ ) | 0.504         | 73.262       | 0.120       | -0.309         |
|     |                              |          | RMSE                      | 0.123         | 28.251       | 0.066       | 0.058          |
|     |                              |          | CP (asymptotic CI)        | 0.944         | 0.958        | 0.941       | 0.960          |
|     |                              |          | CP (bootstrap CI)         | 0.953         | 0.966        | 0.953       | 0.970          |
| 60  | (1.25, 100, -1/5, 1/2)       | 2044.81  | bias ( $\times 10^{-2}$ ) | 0.096         | 60.649       | 0.180       | -0.073         |
|     |                              |          | RMSE                      | 0.058         | 13.894       | 0.041       | 0.037          |
|     |                              |          | CP (asymptotic CI)        | 0.955         | 0.950        | 0.947       | 0.961          |
|     |                              |          | CP (bootstrap CI)         | 0.947         | 0.948        | 0.956       | 0.968          |
|     | (1.25, 100, -1/8, 1/2)       | 2637.54  | bias ( $\times 10^{-2}$ ) | 0.086         | 13.258       | 0.027       | 0.047          |
|     |                              |          | RMSE                      | 0.051         | 10.152       | 0.045       | 0.033          |
|     |                              |          | CP (asymptotic CI)        | 0.944         | 0.947        | 0.952       | 0.965          |
|     |                              |          | CP (bootstrap CI)         | 0.957         | 0.953        | 0.946       | 0.954          |
|     | (1.25, 100, -1/10, 1/2)      | 2683.84  | bias ( $\times 10^{-2}$ ) | 0.123         | 34.243       | -0.105      | 0.289          |
|     |                              |          | RMSE                      | 0.092         | 23.561       | 0.037       | 0.046          |
|     |                              |          | CP (asymptotic CI)        | 0.952         | 0.959        | 0.953       | 0.967          |
|     |                              |          | CP (bootstrap CI)         | 0.955         | 0.957        | 0.962       | 0.973          |

Table 8: Biases and RMSEs of the MLE, the coverage probability (CP) of the 95% asymptotic confidence interval (CI) and 95% bootstrap confidence interval and average computation time (in seconds), computed based on 1,000 Monte Carlo replications, under the PLP-Lognormal model with the PM time interval:  $\Delta = 540$ .

| $n$ | $(\beta, \eta, \mu, \sigma)$ | Run time |                           | $\hat{\beta}$ | $\hat{\eta}$ | $\hat{\mu}$ | $\hat{\sigma}$ |
|-----|------------------------------|----------|---------------------------|---------------|--------------|-------------|----------------|
| 30  | (1.25, 100, -1/5, 1/2)       | 1215.37  | bias ( $\times 10^{-2}$ ) | 0.081         | 145.603      | 0.237       | -1.332         |
|     |                              |          | RMSE                      | 0.091         | 21.965       | 0.064       | 0.058          |
|     |                              |          | CP (asymptotic CI)        | 0.961         | 0.953        | 0.955       | 0.953          |
|     |                              |          | CP (bootstrap CI)         | 0.968         | 0.957        | 0.963       | 0.965          |
|     | (1.25, 100, -1/8, 1/2)       | 1270.73  | bias ( $\times 10^{-2}$ ) | -0.071        | 83.930       | 0.043       | -1.414         |
|     |                              |          | RMSE                      | 0.086         | 20.233       | 0.068       | 0.058          |
|     |                              |          | CP (asymptotic CI)        | 0.947         | 0.954        | 0.932       | 0.949          |
|     |                              |          | CP (bootstrap CI)         | 0.954         | 0.961        | 0.951       | 0.959          |
|     | (1.25, 100, -1/10, 1/2)      | 1324.08  | bias ( $\times 10^{-2}$ ) | -0.210        | 63.181       | 0.223       | -1.349         |
|     |                              |          | RMSE                      | 0.098         | 22.293       | 0.070       | 0.060          |
|     |                              |          | CP (asymptotic CI)        | 0.927         | 0.937        | 0.912       | 0.941          |
|     |                              |          | CP (bootstrap CI)         | 0.945         | 0.951        | 0.937       | 0.956          |
| 45  | (1.25, 100, -1/5, 1/2)       | 1354.13  | bias ( $\times 10^{-2}$ ) | 0.121         | 84.521       | 0.235       | -0.920         |
|     |                              |          | RMSE                      | 0.073         | 19.529       | 0.055       | 0.045          |
|     |                              |          | CP (asymptotic CI)        | 0.961         | 0.963        | 0.959       | 0.971          |
|     |                              |          | CP (bootstrap CI)         | 0.958         | 0.966        | 0.953       | 0.967          |
|     | (1.25, 100, -1/8, 1/2)       | 1279.86  | bias ( $\times 10^{-2}$ ) | 0.068         | 73.451       | 0.035       | -0.946         |
|     |                              |          | RMSE                      | 0.071         | 18.791       | 0.059       | 0.048          |
|     |                              |          | CP (asymptotic CI)        | 0.953         | 0.952        | 0.966       | 0.952          |
|     |                              |          | CP (bootstrap CI)         | 0.960         | 0.947        | 0.968       | 0.971          |
|     | (1.25, 100, -1/10, 1/2)      | 1537.02  | bias ( $\times 10^{-2}$ ) | 0.133         | 52.881       | 0.302       | -1.431         |
|     |                              |          | RMSE                      | 0.052         | 20.274       | 0.059       | 0.057          |
|     |                              |          | CP (asymptotic CI)        | 0.951         | 0.958        | 0.949       | 0.967          |
|     |                              |          | CP (bootstrap CI)         | 0.963         | 0.961        | 0.955       | 0.948          |
| 60  | (1.25, 100, -1/5, 1/2)       | 1471.24  | bias ( $\times 10^{-2}$ ) | -0.108        | 64.945       | 0.161       | -0.496         |
|     |                              |          | RMSE                      | 0.057         | 14.245       | 0.043       | 0.039          |
|     |                              |          | CP (asymptotic CI)        | 0.968         | 0.962        | 0.964       | 0.970          |
|     |                              |          | CP (bootstrap CI)         | 0.972         | 0.965        | 0.968       | 0.970          |
|     | (1.25, 100, -1/8, 1/2)       | 1306.54  | bias ( $\times 10^{-2}$ ) | 0.091         | 56.144       | 0.117       | -0.492         |
|     |                              |          | RMSE                      | 0.059         | 14.567       | 0.041       | 0.040          |
|     |                              |          | CP (asymptotic CI)        | 0.966         | 0.965        | 0.961       | 0.959          |
|     |                              |          | CP (bootstrap CI)         | 0.960         | 0.968        | 0.959       | 0.963          |
|     | (1.25, 100, -1/10, 1/2)      | 1622.46  | bias ( $\times 10^{-2}$ ) | 0.028         | 73.015       | 0.333       | -0.668         |
|     |                              |          | RMSE                      | 0.063         | 15.207       | 0.046       | 0.037          |
|     |                              |          | CP (asymptotic CI)        | 0.949         | 0.956        | 0.943       | 0.959          |
|     |                              |          | CP (bootstrap CI)         | 0.954         | 0.961        | 0.949       | 0.964          |

Table 9: Biases and RMSEs of the MLE, the coverage probability (CP) of the 95% asymptotic confidence interval (CI) and 95% bootstrap confidence interval and average computation time (in seconds), computed based on 1,000 Monte Carlo replications, under the PLP-Lognormal model with the PM time interval:  $\Delta = 630$ .

| $n$ | $(\beta, \eta, \mu, \sigma)$ | Run time |                           | $\hat{\beta}$ | $\hat{\eta}$ | $\hat{\mu}$ | $\hat{\sigma}$ |
|-----|------------------------------|----------|---------------------------|---------------|--------------|-------------|----------------|
| 30  | (1.25, 100, $-1/8, 1/2$ )    | 1361.95  | bias ( $\times 10^{-2}$ ) | 0.092         | 38.547       | 0.082       | -0.630         |
|     |                              |          | RMSE                      | 0.088         | 28.724       | 0.053       | 0.079          |
|     |                              |          | CP (asymptotic CI)        | 0.954         | 0.960        | 0.947       | 0.933          |
|     |                              |          | CP (bootstrap CI)         | 0.955         | 0.965        | 0.954       | 0.952          |
|     | (1.25, 100, $-1/10, 1/2$ )   | 2193.20  | bias ( $\times 10^{-2}$ ) | -0.426        | 56.236       | 0.543       | -0.978         |
|     |                              |          | RMSE                      | 0.063         | 35.721       | 0.045       | 0.082          |
|     |                              |          | CP (asymptotic CI)        | 0.935         | 0.941        | 0.937       | 0.946          |
|     |                              |          | CP (bootstrap CI)         | 0.947         | 0.958        | 0.9432      | 0.950          |
| 45  | (1.25, 100, $-1/5, 1/2$ )    | 1241.92  | bias ( $\times 10^{-2}$ ) | 0.073         | 26.251       | 0.131       | 0.653          |
|     |                              |          | RMSE                      | 0.042         | 16.025       | 0.063       | 0.044          |
|     |                              |          | CP (asymptotic CI)        | 0.955         | 0.957        | 0.952       | 0.946          |
|     |                              |          | CP (bootstrap CI)         | 0.956         | 0.949        | 0.963       | 0.958          |
|     | (1.25, 100, $-1/8, 1/2$ )    | 1567.05  | bias ( $\times 10^{-2}$ ) | 0.037         | 29.043       | -0.067      | 0.572          |
|     |                              |          | RMSE                      | 0.046         | 27.420       | 0.041       | 0.055          |
|     |                              |          | CP (asymptotic CI)        | 0.957         | 0.953        | 0.957       | 0.939          |
|     |                              |          | CP (bootstrap CI)         | 0.955         | 0.961        | 0.955       | 0.952          |
|     | (1.25, 100, $-1/10, 1/2$ )   | 2499.63  | bias ( $\times 10^{-2}$ ) | 0.194         | 41.853       | 0.327       | 0.635          |
|     |                              |          | RMSE                      | 0.053         | 30.542       | 0.047       | 0.069          |
|     |                              |          | CP (asymptotic CI)        | 0.946         | 0.953        | 0.948       | 0.955          |
|     |                              |          | CP (bootstrap CI)         | 0.952         | 0.966        | 0.953       | 0.964          |
| 60  | (1.25, 100, $-1/5, 1/2$ )    | 1572.35  | bias ( $\times 10^{-2}$ ) | 0.034         | 19.962       | 0.056       | -0.342         |
|     |                              |          | RMSE                      | 0.038         | 12.056       | 0.045       | 0.032          |
|     |                              |          | CP (asymptotic CI)        | 0.951         | 0.956        | 0.947       | 0.945          |
|     |                              |          | CP (bootstrap CI)         | 0.957         | 0.958        | 0.946       | 0.951          |
|     | (1.25, 100, $-1/8, 1/2$ )    | 1736.82  | bias ( $\times 10^{-2}$ ) | 0.044         | 22.451       | 0.032       | 0.296          |
|     |                              |          | RMSE                      | 0.031         | 16.583       | 0.031       | 0.045          |
|     |                              |          | CP (asymptotic CI)        | 0.948         | 0.955        | 0.944       | 0.946          |
|     |                              |          | CP (bootstrap CI)         | 0.942         | 0.963        | 0.948       | 0.969          |
|     | (1.25, 100, $-1/10, 1/2$ )   | 2731.36  | bias ( $\times 10^{-2}$ ) | 0.083         | 35.765       | 0.184       | 0.428          |
|     |                              |          | RMSE                      | 0.045         | 26.209       | 0.036       | 0.077          |
|     |                              |          | CP (asymptotic CI)        | 0.948         | 0.949        | 0.957       | 0.952          |
|     |                              |          | CP (bootstrap CI)         | 0.954         | 0.963        | 0.956       | 0.955          |

Table 10: Biases and RMSEs of the MLE, the coverage probability (CP) of the 95% asymptotic confidence interval (CI) and 95% bootstrap confidence interval and average computation time (in seconds), computed based on 1,000 Monte Carlo replications, under the PLP-Gamma model with the PM time interval:  $\Delta = 365$ .

| $n$ | $(\beta, \eta, \alpha, \nu)$ | Run time |                           | $\hat{\beta}$ | $\hat{\eta}$ | $\hat{\alpha}$ | $\hat{\nu}$ |
|-----|------------------------------|----------|---------------------------|---------------|--------------|----------------|-------------|
| 30  | (1.25, 100, 4, 5)            | 1988.53  | bias ( $\times 10^{-2}$ ) | 0.468         | 253.675      | 3.774          | 5.238       |
|     |                              |          | RMSE                      | 0.084         | 25.401       | 1.042          | 1.217       |
|     |                              |          | CP (asymptotic CI)        | 0.937         | 0.936        | 0.945          | 0.957       |
|     |                              |          | CP (bootstrap CI)         | 0.942         | 0.943        | 0.958          | 0.953       |
|     | (1.25, 100, 5, 5)            | 2762.04  | bias ( $\times 10^{-2}$ ) | 0.249         | 136.057      | 3.509          | 4.264       |
|     |                              |          | RMSE                      | 0.073         | 17.488       | 1.480          | 1.611       |
|     |                              |          | CP (asymptotic CI)        | 0.945         | 0.932        | 0.939          | 0.951       |
|     |                              |          | CP (bootstrap CI)         | 0.953         | 0.949        | 0.941          | 0.955       |
| 45  | (1.25, 100, 4, 5)            | 2604.52  | bias ( $\times 10^{-2}$ ) | -0.252        | 171.432      | 3.063          | 4.738       |
|     |                              |          | RMSE                      | 0.055         | 19.932       | 1.307          | 0.843       |
|     |                              |          | CP (asymptotic CI)        | 0.936         | 0.945        | 0.961          | 0.972       |
|     |                              |          | CP (bootstrap CI)         | 0.949         | 0.952        | 0.965          | 0.956       |
|     | (1.25, 100, 5, 5)            | 3542.67  | bias ( $\times 10^{-2}$ ) | 0.175         | 95.323       | 2.891          | 4.032       |
|     |                              |          | RMSE                      | 0.053         | 16.360       | 1.030          | 1.361       |
|     |                              |          | CP (asymptotic CI)        | 0.943         | 0.946        | 0.941          | 0.959       |
|     |                              |          | CP (bootstrap CI)         | 0.955         | 0.954        | 0.953          | 0.948       |
| 60  | (1.25, 100, 4, 5)            | 3259.05  | bias ( $\times 10^{-2}$ ) | 0.219         | 123.643      | 1.854          | 2.438       |
|     |                              |          | RMSE                      | 0.031         | 18.950       | 0.712          | 1.258       |
|     |                              |          | CP (asymptotic CI)        | 0.944         | 0.951        | 0.957          | 0.968       |
|     |                              |          | CP (bootstrap CI)         | 0.958         | 0.957        | 0.961          | 0.952       |
|     | (1.25, 100, 5, 5)            | 4746.24  | bias ( $\times 10^{-2}$ ) | -0.187        | 72.523       | 1.671          | 3.467       |
|     |                              |          | RMSE                      | 0.041         | 15.432       | 0.798          | 1.654       |
|     |                              |          | CP (asymptotic CI)        | 0.939         | 0.947        | 0.952          | 0.953       |
|     |                              |          | CP (bootstrap CI)         | 0.947         | 0.950        | 0.959          | 0.962       |



Table 11: Biases and RMSEs of the MLE, the coverage probability (CP) of the 95% asymptotic confidence interval (CI) and 95% bootstrap confidence interval and average computation time (in seconds), computed based on 1,000 Monte Carlo replications, under the PLP-Gamma model with the PM time interval:  $\Delta = 450$ .

| $n$ | $(\beta, \eta, \alpha, \nu)$ | Run time |                           | $\hat{\beta}$ | $\hat{\eta}$ | $\hat{\alpha}$ | $\hat{\nu}$ |
|-----|------------------------------|----------|---------------------------|---------------|--------------|----------------|-------------|
| 30  | (1.25, 100, 4, 5)            | 1451.76  | bias ( $\times 10^{-2}$ ) | 0.435         | 202.532      | 12.128         | 7.432       |
|     |                              |          | RMSE                      | 0.093         | 22.816       | 2.341          | 1.933       |
|     |                              |          | CP (asymptotic CI)        | 0.941         | 0.939        | 0.941          | 0.958       |
|     |                              |          | CP (bootstrap CI)         | 0.952         | 0.946        | 0.953          | 0.969       |
|     | (1.25, 100, 5, 5)            | 1236.64  | bias ( $\times 10^{-2}$ ) | 0.334         | 145.251      | 4.537          | 3.447       |
|     |                              |          | RMSE                      | 0.060         | 15.753       | 0.746          | 0.771       |
|     |                              |          | CP (asymptotic CI)        | 0.965         | 0.946        | 0.947          | 0.953       |
|     |                              |          | CP (bootstrap CI)         | 0.957         | 0.953        | 0.951          | 0.956       |
| 45  | (1.25, 100, 4, 5)            | 1156.04  | bias ( $\times 10^{-2}$ ) | -0.372        | 121.432      | 3.063          | 4.738       |
|     |                              |          | RMSE                      | 0.052         | 15.932       | 1.307          | 0.843       |
|     |                              |          | CP (asymptotic CI)        | 0.936         | 0.945        | 0.961          | 0.972       |
|     |                              |          | CP (bootstrap CI)         | 0.949         | 0.952        | 0.965          | 0.956       |
|     | (1.25, 100, 5, 5)            | 1266.91  | bias ( $\times 10^{-2}$ ) | 0.275         | 95.323       | 2.891          | 4.032       |
|     |                              |          | RMSE                      | 0.053         | 16.360       | 1.030          | 1.361       |
|     |                              |          | CP (asymptotic CI)        | 0.943         | 0.946        | 0.941          | 0.959       |
|     |                              |          | CP (bootstrap CI)         | 0.955         | 0.954        | 0.953          | 0.948       |
| 60  | (1.25, 100, 4, 5)            | 2634.67  | bias ( $\times 10^{-2}$ ) | 0.129         | 93.643       | 1.854          | 2.438       |
|     |                              |          | RMSE                      | 0.031         | 18.950       | 0.712          | 1.258       |
|     |                              |          | CP (asymptotic CI)        | 0.944         | 0.951        | 0.957          | 0.968       |
|     |                              |          | CP (bootstrap CI)         | 0.958         | 0.957        | 0.961          | 0.952       |
|     | (1.25, 100, 5, 5)            | 2978.40  | bias ( $\times 10^{-2}$ ) | -0.261        | 62.523       | 1.671          | 3.467       |
|     |                              |          | RMSE                      | 0.041         | 15.432       | 0.798          | 1.423       |
|     |                              |          | CP (asymptotic CI)        | 0.939         | 0.947        | 0.952          | 0.953       |
|     |                              |          | CP (bootstrap CI)         | 0.947         | 0.950        | 0.959          | 0.962       |

Table 12: Biases and RMSEs of the MLE, the coverage probability (CP) of the 95% asymptotic confidence interval (CI) and 95% bootstrap confidence interval and average computation time (in seconds), computed based on 1,000 Monte Carlo replications, under the PLP-Gamma model with the PM time interval:  $\Delta = 540$ .

| $n$ | $(\beta, \eta, \alpha, \nu)$ | Run time |                           | $\hat{\beta}$ | $\hat{\eta}$ | $\hat{\alpha}$ | $\hat{\nu}$ |
|-----|------------------------------|----------|---------------------------|---------------|--------------|----------------|-------------|
| 30  | (1.25, 100, 4, 5)            | 1067.32  | bias ( $\times 10^{-2}$ ) | -0.336        | -156.334     | 4.501          | 3.176       |
|     |                              |          | RMSE                      | 0.076         | 18.958       | 1.232          | 0.838       |
|     |                              |          | CP (asymptotic CI)        | 0.965         | 0.937        | 0.943          | 0.946       |
|     |                              |          | CP (bootstrap CI)         | 0.954         | 0.946        | 0.957          | 0.955       |
|     | (1.25, 100, 5, 5)            | 1205.46  | bias ( $\times 10^{-2}$ ) | 0.223         | 163.675      | 17.832         | 16.310      |
|     |                              |          | RMSE                      | 0.074         | 18.401       | 0.989          | 1.127       |
|     |                              |          | CP (asymptotic CI)        | 0.949         | 0.957        | 0.960          | 0.938       |
|     |                              |          | CP (bootstrap CI)         | 0.954         | 0.963        | 0.958          | 0.951       |
| 45  | (1.25, 100, 4, 5)            | 1176.01  | bias ( $\times 10^{-2}$ ) | 0.203         | 132.201      | 3.036          | 2.621       |
|     |                              |          | RMSE                      | 0.058         | 18.830       | 0.754          | 0.652       |
|     |                              |          | CP (asymptotic CI)        | 0.953         | 0.948        | 0.961          | 0.949       |
|     |                              |          | CP (bootstrap CI)         | 0.961         | 0.959        | 0.968          | 0.952       |
|     | (1.25, 100, 5, 5)            | 1365.87  | bias ( $\times 10^{-2}$ ) | 0.132         | 107.753      | 14.740         | 13.954      |
|     |                              |          | RMSE                      | 0.073         | 15.134       | 0.800          | 0.862       |
|     |                              |          | CP (asymptotic CI)        | 0.947         | 0.943        | 0.964          | 0.957       |
|     |                              |          | CP (bootstrap CI)         | 0.958         | 0.945        | 0.966          | 0.960       |
| 60  | (1.25, 100, 4, 5)            | 1684.63  | bias ( $\times 10^{-2}$ ) | 0.137         | 91.854       | 7.154          | 8.607       |
|     |                              |          | RMSE                      | 0.060         | 15.753       | 0.625          | 0.771       |
|     |                              |          | CP (asymptotic CI)        | 0.964         | 0.955        | 0.962          | 0.957       |
|     |                              |          | CP (bootstrap CI)         | 0.958         | 0.958        | 0.963          | 0.964       |
|     | (1.25, 100, 5, 5)            | 1479.65  | bias ( $\times 10^{-2}$ ) | 0.085         | 79.923       | 10.219         | 9.018       |
|     |                              |          | RMSE                      | 0.056         | 13.926       | 0.743          | 0.776       |
|     |                              |          | CP (asymptotic CI)        | 0.958         | 0.947        | 0.950          | 0.953       |
|     |                              |          | CP (bootstrap CI)         | 0.961         | 0.950        | 0.953          | 0.949       |

Table 13: Biases and RMSEs of the MLE, the coverage probability (CP) of the 95% asymptotic confidence interval (CI) and 95% bootstrap confidence interval and average computation time (in seconds), computed based on 1,000 Monte Carlo replications, under the PLP-Gamma model with the PM time interval:  $\Delta = 630$ .

| $n$ | $(\beta, \eta, \alpha, \nu)$ | Run time |                           | $\hat{\beta}$ | $\hat{\eta}$ | $\hat{\alpha}$ | $\hat{\nu}$ |
|-----|------------------------------|----------|---------------------------|---------------|--------------|----------------|-------------|
| 30  | (1.25, 100, 4, 5)            | 1025.51  | bias ( $\times 10^{-2}$ ) | 0.366         | 139.856      | 12.293         | 14.475      |
|     |                              |          | RMSE                      | 0.085         | 19.669       | 1.633          | 1.346       |
|     |                              |          | CP (asymptotic CI)        | 0.947         | 0.935        | 0.965          | 0.959       |
|     |                              |          | CP (bootstrap CI)         | 0.958         | 0.943        | 0.968          | 0.963       |
|     | (1.25, 100, 5, 5)            | 988.80   | bias ( $\times 10^{-2}$ ) | 0.476         | 98.562       | 10.385         | 8.051       |
|     |                              |          | RMSE                      | 0.091         | 20.859       | 1.102          | 0.738       |
|     |                              |          | CP (asymptotic CI)        | 0.955         | 0.947        | 0.971          | 0.948       |
|     |                              |          | CP (bootstrap CI)         | 0.951         | 0.959        | 0.968          | 0.954       |
| 45  | (1.25, 100, 4, 5)            | 1123.57  | bias ( $\times 10^{-2}$ ) | 0.223         | 82.392       | 6.934          | 8.203       |
|     |                              |          | RMSE                      | 0.076         | 18.473       | 0.894          | 1.032       |
|     |                              |          | CP (asymptotic CI)        | 0.936         | 0.955        | 0.957          | 0.948       |
|     |                              |          | CP (bootstrap CI)         | 0.944         | 0.959        | 0.966          | 0.959       |
|     | (1.25, 100, 5, 5)            | 1089.83  | bias ( $\times 10^{-2}$ ) | 0.249         | 75.391       | 9.305          | 8.264       |
|     |                              |          | RMSE                      | 0.076         | 18.536       | 0.869          | 1.024       |
|     |                              |          | CP (asymptotic CI)        | 0.953         | 0.943        | 0.957          | 0.939       |
|     |                              |          | CP (bootstrap CI)         | 0.959         | 0.952        | 0.964          | 0.944       |
| 60  | (1.25, 100, 4, 5)            | 1278.64  | bias ( $\times 10^{-2}$ ) | 0.161         | 76.205       | 7.885          | 10.417      |
|     |                              |          | RMSE                      | 0.067         | 14.646       | 0.794          | 0.634       |
|     |                              |          | CP (asymptotic CI)        | 0.957         | 0.953        | 0.950          | 0.948       |
|     |                              |          | CP (bootstrap CI)         | 0.959         | 0.962        | 0.953          | 0.945       |
|     | (1.25, 100, 5, 5)            | 1548.97  | bias ( $\times 10^{-2}$ ) | 0.134         | 67.264       | 5.937          | 6.205       |
|     |                              |          | RMSE                      | 0.057         | 14.759       | 0.842          | 0.835       |
|     |                              |          | CP (asymptotic CI)        | 0.963         | 0.947        | 0.956          | 0.946       |
|     |                              |          | CP (bootstrap CI)         | 0.967         | 0.958        | 0.960          | 0.948       |

Table 14: Biases and RMSEs of the MLE, the coverage probability (CP) of the 95% asymptotic confidence interval (CI) and 95% bootstrap confidence interval and average computation time (in seconds), computed based on 1,000 Monte Carlo replications, under the LLP-Lognormal model with the PM time interval:  $\Delta = 365$ .

| $n$ | $(\beta, \eta, \mu, \sigma)$ | Run time |                           | $\hat{\beta}$          | $\hat{\eta}$ | $\hat{\mu}$ | $\hat{\sigma}$ |
|-----|------------------------------|----------|---------------------------|------------------------|--------------|-------------|----------------|
| 30  | (0.0005, -4.5, -0.2, 0.5)    | 1520.53  | bias ( $\times 10^{-2}$ ) | $6.234 \times 10^{-3}$ | 1.832        | 0.179       | 0.145          |
|     |                              |          | RMSE                      | $3.689 \times 10^{-4}$ | 0.082        | 0.066       | 0.079          |
|     |                              |          | CP (asymptotic CI)        | 0.931                  | 0.939        | 0.943       | 0.958          |
|     |                              |          | CP (bootstrap CI)         | 0.951                  | 0.945        | 0.950       | 0.963          |
|     | (0.0005, -4.5, -0.125, 0.5)  | 2261.48  | bias ( $\times 10^{-2}$ ) | $7.346 \times 10^{-3}$ | 2.674        | -0.158      | 0.234          |
|     |                              |          | RMSE                      | $8.458 \times 10^{-5}$ | 0.094        | 0.049       | 0.068          |
|     |                              |          | CP (asymptotic CI)        | 0.921                  | 0.937        | 0.958       | 0.962          |
|     |                              |          | CP (bootstrap CI)         | 0.938                  | 0.946        | 0.961       | 0.957          |
|     | (0.0005, -4.5, -0.1, 0.5)    | 3215.62  | bias ( $\times 10^{-2}$ ) | $5.850 \times 10^{-3}$ | 2.159        | -0.433      | 0.524          |
|     |                              |          | RMSE                      | $3.405 \times 10^{-4}$ | 0.125        | 0.059       | 0.061          |
|     |                              |          | CP (asymptotic CI)        | 0.925                  | 0.933        | 0.948       | 0.961          |
|     |                              |          | CP (bootstrap CI)         | 0.940                  | 0.945        | 0.952       | 0.975          |
| 45  | (0.0005, -4.5, -0.2, 0.5)    | 2294.30  | bias ( $\times 10^{-2}$ ) | $3.696 \times 10^{-3}$ | 1.341        | 0.088       | 0.133          |
|     |                              |          | RMSE                      | $2.548 \times 10^{-4}$ | 0.055        | 0.079       | 0.063          |
|     |                              |          | CP (asymptotic CI)        | 0.935                  | 0.944        | 0.940       | 0.951          |
|     |                              |          | CP (bootstrap CI)         | 0.945                  | 0.952        | 0.954       | 0.956          |
|     | (0.0005, -4.5, -0.125, 0.5)  | 3231.43  | bias ( $\times 10^{-2}$ ) | $6.457 \times 10^{-3}$ | 3.749        | 0.122       | -0.146         |
|     |                              |          | RMSE                      | $6.759 \times 10^{-4}$ | 0.123        | 0.074       | 0.058          |
|     |                              |          | CP (asymptotic CI)        | 0.932                  | 0.945        | 0.955       | 0.958          |
|     |                              |          | CP (bootstrap CI)         | 0.943                  | 0.953        | 0.952       | 0.969          |
|     | (0.0005, -4.5, -0.1, 0.5)    | 4534.56  | bias ( $\times 10^{-2}$ ) | $8.254 \times 10^{-4}$ | -0.353       | -0.310      | 0.358          |
|     |                              |          | RMSE                      | $1.116 \times 10^{-4}$ | 0.113        | 0.042       | 0.046          |
|     |                              |          | CP (asymptotic CI)        | 0.920                  | 0.934        | 0.941       | 0.953          |
|     |                              |          | CP (bootstrap CI)         | 0.936                  | 0.944        | 0.955       | 0.962          |
| 60  | (0.0005, -4.5, -0.2, 0.5)    | 2453.10  | bias ( $\times 10^{-2}$ ) | $8.439 \times 10^{-6}$ | 0.647        | 0.012       | -0.023         |
|     |                              |          | RMSE                      | $7.259 \times 10^{-5}$ | 0.092        | 0.060       | 0.034          |
|     |                              |          | CP (asymptotic CI)        | 0.941                  | 0.943        | 0.956       | 0.962          |
|     |                              |          | CP (bootstrap CI)         | 0.954                  | 0.951        | 0.950       | 0.970          |
|     | (0.0005, -4.5, -0.125, 0.5)  | 3671.09  | bias ( $\times 10^{-2}$ ) | $3.604 \times 10^{-4}$ | 1.516        | -0.042      | 0.039          |
|     |                              |          | RMSE                      | $8.046 \times 10^{-5}$ | 0.070        | 0.054       | 0.038          |
|     |                              |          | CP (asymptotic CI)        | 0.956                  | 0.943        | 0.953       | 0.948          |
|     |                              |          | CP (bootstrap CI)         | 0.944                  | 0.945        | 0.957       | 0.960          |
|     | (0.0005, -4.5, -0.1, 0.5)    | 5269.36  | bias ( $\times 10^{-2}$ ) | $5.631 \times 10^{-4}$ | 0.387        | 0.087       | -0.138         |
|     |                              |          | RMSE                      | $2.193 \times 10^{-4}$ | 0.132        | 0.025       | 0.036          |
|     |                              |          | CP (asymptotic CI)        | 0.927                  | 0.943        | 0.947       | 0.963          |
|     |                              |          | CP (bootstrap CI)         | 0.933                  | 0.952        | 0.951       | 0.959          |

Table 15: Biases and RMSEs of the MLE, the coverage probability (CP) of the 95% asymptotic confidence interval (CI) and 95% bootstrap confidence interval and average computation time (in seconds), computed based on 1,000 Monte Carlo replications, under the LLP-Lognormal model with the PM time interval:  $\Delta = 450$ .

| $n$ | $(\beta, \eta, \mu, \sigma)$ | Run time |                           | $\hat{\beta}$           | $\hat{\eta}$ | $\hat{\mu}$ | $\hat{\sigma}$ |
|-----|------------------------------|----------|---------------------------|-------------------------|--------------|-------------|----------------|
| 30  | (0.0005, -4.5, -0.2, 0.5)    | 1184.03  | bias ( $\times 10^{-2}$ ) | $-4.125 \times 10^{-3}$ | 2.836        | 0.131       | 0.193          |
|     |                              |          | RMSE                      | $3.069 \times 10^{-4}$  | 0.176        | 0.102       | 0.121          |
|     |                              |          | CP (asymptotic CI)        | 0.927                   | 0.942        | 0.956       | 0.939          |
|     |                              |          | CP (bootstrap CI)         | 0.948                   | 0.945        | 0.971       | 0.960          |
|     | (0.0005, -4.5, -0.125, 0.5)  | 1548.29  | bias ( $\times 10^{-2}$ ) | $7.127 \times 10^{-3}$  | 2.142        | 0.135       | 0.224          |
|     |                              |          | RMSE                      | $2.481 \times 10^{-4}$  | 0.243        | 0.102       | 0.119          |
|     |                              |          | CP (asymptotic CI)        | 0.921                   | 0.935        | 0.942       | 0.943          |
|     |                              |          | CP (bootstrap CI)         | 0.945                   | 0.958        | 0.946       | 0.949          |
|     | (0.0005, -4.5, -0.1, 0.5)    | 1865.18  | bias ( $\times 10^{-2}$ ) | $6.813 \times 10^{-3}$  | 1.598        | 0.275       | -0.312         |
|     |                              |          | RMSE                      | $2.941 \times 10^{-4}$  | 0.153        | 0.089       | 0.057          |
|     |                              |          | CP (asymptotic CI)        | 0.916                   | 0.941        | 0.952       | 0.960          |
|     |                              |          | CP (bootstrap CI)         | 0.946                   | 0.949        | 0.958       | 0.969          |
| 45  | (0.0005, -4.5, -0.2, 0.5)    | 1994.23  | bias ( $\times 10^{-2}$ ) | $2.129 \times 10^{-3}$  | 1.322        | 0.119       | 0.173          |
|     |                              |          | RMSE                      | $4.691 \times 10^{-4}$  | 0.123        | 0.081       | 0.054          |
|     |                              |          | CP (asymptotic CI)        | 0.930                   | 0.949        | 0.955       | 0.942          |
|     |                              |          | CP (bootstrap CI)         | 0.946                   | 0.953        | 0.962       | 0.954          |
|     | (0.0005, -4.5, -0.125, 0.5)  | 2418.62  | bias ( $\times 10^{-2}$ ) | $5.385 \times 10^{-3}$  | 0.932        | 0.122       | 0.185          |
|     |                              |          | RMSE                      | $9.210 \times 10^{-5}$  | 0.152        | 0.063       | 0.091          |
|     |                              |          | CP (asymptotic CI)        | 0.929                   | 0.938        | 0.946       | 0.947          |
|     |                              |          | CP (bootstrap CI)         | 0.951                   | 0.945        | 0.957       | 0.969          |
|     | (0.0005, -4.5, -0.1, 0.5)    | 2711.10  | bias ( $\times 10^{-2}$ ) | $-1.168 \times 10^{-3}$ | 0.149        | 0.157       | -0.193         |
|     |                              |          | RMSE                      | $1.007 \times 10^{-4}$  | 0.102        | 0.051       | 0.049          |
|     |                              |          | CP (asymptotic CI)        | 0.922                   | 0.939        | 0.945       | 0.953          |
|     |                              |          | CP (bootstrap CI)         | 0.937                   | 0.944        | 0.953       | 0.967          |
| 60  | (0.0005, -4.5, -0.2, 0.5)    | 2305.27  | bias ( $\times 10^{-2}$ ) | $8.754 \times 10^{-4}$  | 1.823        | 0.089       | 0.121          |
|     |                              |          | RMSE                      | $9.814 \times 10^{-5}$  | 0.095        | 0.054       | 0.072          |
|     |                              |          | CP (asymptotic CI)        | 0.934                   | 0.953        | 0.953       | 0.949          |
|     |                              |          | CP (bootstrap CI)         | 0.939                   | 0.949        | 0.957       | 0.963          |
|     | (0.0005, -4.5, -0.125, 0.5)  | 2892.37  | bias ( $\times 10^{-2}$ ) | $-1.594 \times 10^{-3}$ | 0.502        | 0.052       | -0.081         |
|     |                              |          | RMSE                      | $6.127 \times 10^{-5}$  | 0.077        | 0.061       | 0.083          |
|     |                              |          | CP (asymptotic CI)        | 0.941                   | 0.943        | 0.955       | 0.949          |
|     |                              |          | CP (bootstrap CI)         | 0.942                   | 0.955        | 0.963       | 0.970          |
|     | (0.0005, -4.5, -0.1, 0.5)    | 3021.69  | bias ( $\times 10^{-2}$ ) | $7.183 \times 10^{-4}$  | 0.374        | 0.077       | 0.109          |
|     |                              |          | RMSE                      | $5.127 \times 10^{-5}$  | 0.083        | 0.042       | 0.055          |
|     |                              |          | CP (asymptotic CI)        | 0.936                   | 0.944        | 0.947       | 0.951          |
|     |                              |          | CP (bootstrap CI)         | 0.953                   | 0.949        | 0.956       | 0.943          |

Table 16: Biases and RMSEs of the MLE, the coverage probability (CP) of the 95% asymptotic confidence interval (CI) and 95% bootstrap confidence interval and average computation time (in seconds), computed based on 1,000 Monte Carlo replications, under the LLP-Lognormal model with the PM time interval:  $\Delta = 540$ .

| $n$ | $(\beta, \eta, \mu, \sigma)$ | Run time |                           | $\hat{\beta}$           | $\hat{\eta}$ | $\hat{\mu}$ | $\hat{\sigma}$ |
|-----|------------------------------|----------|---------------------------|-------------------------|--------------|-------------|----------------|
| 30  | (0.0005, -4.5, -0.2, 0.5)    | 1252.73  | bias ( $\times 10^{-2}$ ) | $6.323 \times 10^{-3}$  | 2.317        | 0.127       | 0.218          |
|     |                              |          | RMSE                      | $5.846 \times 10^{-4}$  | 0.104        | 0.083       | 0.064          |
|     |                              |          | CP (asymptotic CI)        | 0.923                   | 0.951        | 0.948       | 0.937          |
|     |                              |          | CP (bootstrap CI)         | 0.941                   | 0.960        | 0.953       | 0.951          |
|     | (0.0005, -4.5, -0.125, 0.5)  | 1410.22  | bias ( $\times 10^{-2}$ ) | $8.852 \times 10^{-3}$  | 1.768        | 0.071       | 0.323          |
|     |                              |          | RMSE                      | $3.549 \times 10^{-4}$  | 0.152        | 0.115       | 0.087          |
|     |                              |          | CP (asymptotic CI)        | 0.925                   | 0.946        | 0.939       | 0.940          |
|     |                              |          | CP (bootstrap CI)         | 0.941                   | 0.953        | 0.944       | 0.946          |
|     | (0.0005, -4.5, -0.1, 0.5)    | 1926.51  | bias ( $\times 10^{-2}$ ) | $-3.573 \times 10^{-3}$ | 4.561        | 0.115       | 0.241          |
|     |                              |          | RMSE                      | $9.605 \times 10^{-5}$  | 0.136        | 0.092       | 0.083          |
|     |                              |          | CP (asymptotic CI)        | 0.932                   | 0.947        | 0.955       | 0.960          |
|     |                              |          | CP (bootstrap CI)         | 0.949                   | 0.952        | 0.959       | 0.953          |
| 45  | (0.0005, -4.5, -0.2, 0.5)    | 1358.64  | bias ( $\times 10^{-2}$ ) | $-2.564 \times 10^{-3}$ | 3.519        | 0.089       | 0.114          |
|     |                              |          | RMSE                      | $3.792 \times 10^{-4}$  | 0.079        | 0.099       | 0.038          |
|     |                              |          | CP (asymptotic CI)        | 0.929                   | 0.958        | 0.951       | 0.943          |
|     |                              |          | CP (bootstrap CI)         | 0.953                   | 0.961        | 0.948       | 0.946          |
|     | (0.0005, -4.5, -0.125, 0.5)  | 1512.64  | bias ( $\times 10^{-2}$ ) | $5.742 \times 10^{-3}$  | 2.833        | 0.117       | 0.185          |
|     |                              |          | RMSE                      | $3.182 \times 10^{-4}$  | 0.137        | 0.093       | 0.103          |
|     |                              |          | CP (asymptotic CI)        | 0.923                   | 0.952        | 0.951       | 0.944          |
|     |                              |          | CP (bootstrap CI)         | 0.955                   | 0.961        | 0.957       | 0.949          |
|     | (0.0005, -4.5, -0.1, 0.5)    | 1493.20  | bias ( $\times 10^{-2}$ ) | $-1.659 \times 10^{-3}$ | 3.176        | 0.218       | -0.258         |
|     |                              |          | RMSE                      | $7.718 \times 10^{-5}$  | 0.104        | 0.056       | 0.066          |
|     |                              |          | CP (asymptotic CI)        | 0.933                   | 0.949        | 0.956       | 0.961          |
|     |                              |          | CP (bootstrap CI)         | 0.946                   | 0.948        | 0.960       | 0.974          |
| 60  | (0.0005, -4.5, -0.2, 0.5)    | 1523.65  | bias ( $\times 10^{-2}$ ) | $9.174 \times 10^{-4}$  | -2.312       | 0.213       | -0.091         |
|     |                              |          | RMSE                      | $7.184 \times 10^{-5}$  | 0.041        | 0.074       | 0.052          |
|     |                              |          | CP (asymptotic CI)        | 0.937                   | 0.954        | 0.946       | 0.949          |
|     |                              |          | CP (bootstrap CI)         | 0.947                   | 0.958        | 0.952       | 0.955          |
|     | (0.0005, -4.5, -0.125, 0.5)  | 1956.72  | bias ( $\times 10^{-2}$ ) | $-1.035 \times 10^{-3}$ | 1.605        | 0.088       | 0.122          |
|     |                              |          | RMSE                      | $9.349 \times 10^{-5}$  | 0.082        | 0.061       | 0.071          |
|     |                              |          | CP (asymptotic CI)        | 0.929                   | 0.948        | 0.953       | 0.946          |
|     |                              |          | CP (bootstrap CI)         | 0.948                   | 0.957        | 0.959       | 0.965          |
|     | (0.0005, -4.5, -0.1, 0.5)    | 2130.28  | bias ( $\times 10^{-2}$ ) | $7.126 \times 10^{-4}$  | 1.857        | 0.163       | 0.115          |
|     |                              |          | RMSE                      | $6.523 \times 10^{-5}$  | 0.077        | 0.065       | 0.032          |
|     |                              |          | CP (asymptotic CI)        | 0.938                   | 0.963        | 0.951       | 0.954          |
|     |                              |          | CP (bootstrap CI)         | 0.942                   | 0.967        | 0.955       | 0.962          |

Table 17: Biases and RMSEs of the MLE, the coverage probability (CP) of the 95% asymptotic confidence interval (CI) and 95% bootstrap confidence interval and average computation time (in seconds), computed based on 1,000 Monte Carlo replications, under the LLP-Lognormal model with the PM time interval:  $\Delta = 630$ .

| $n$ | $(\beta, \eta, \mu, \sigma)$ | Run time |                           | $\hat{\beta}$           | $\hat{\eta}$ | $\hat{\mu}$ | $\hat{\sigma}$ |
|-----|------------------------------|----------|---------------------------|-------------------------|--------------|-------------|----------------|
| 30  | (0.0005, -4.5, -0.2, 0.5)    | 1352.49  | bias ( $\times 10^{-2}$ ) | $3.751 \times 10^{-3}$  | 0.731        | 0.316       | 0.438          |
|     |                              |          | RMSE                      | $4.285 \times 10^{-4}$  | 0.073        | 0.065       | 0.089          |
|     |                              |          | CP (asymptotic CI)        | 0.928                   | 0.954        | 0.941       | 0.950          |
|     |                              |          | CP (bootstrap CI)         | 0.954                   | 0.958        | 0.951       | 0.966          |
|     | (0.0005, -4.5, -0.125, 0.5)  | 1410.22  | bias ( $\times 10^{-2}$ ) | $-1.648 \times 10^{-3}$ | 1.452        | 0.235       | -0.522         |
|     |                              |          | RMSE                      | $1.208 \times 10^{-4}$  | 0.098        | 0.082       | 0.066          |
|     |                              |          | CP (asymptotic CI)        | 0.915                   | 0.941        | 0.944       | 0.963          |
|     |                              |          | CP (bootstrap CI)         | 0.943                   | 0.955        | 0.953       | 0.972          |
|     | (0.0005, -4.5, -0.1, 0.5)    | 1926.51  | bias ( $\times 10^{-2}$ ) | $-2.503 \times 10^{-3}$ | 2.389        | -0.233      | 0.534          |
|     |                              |          | RMSE                      | $9.481 \times 10^{-5}$  | 0.104        | 0.075       | 0.062          |
|     |                              |          | CP (asymptotic)           | 0.920                   | 0.947        | 0.936       | 0.941          |
|     |                              |          | CP (bootstrap)            | 0.942                   | 0.949        | 0.953       | 0.948          |
| 45  | (0.0005, -4.5, -0.2, 0.5)    | 1358.64  | bias ( $\times 10^{-2}$ ) | $1.471 \times 10^{-3}$  | 1.151        | 0.210       | 0.331          |
|     |                              |          | RMSE                      | $2.587 \times 10^{-4}$  | 0.085        | 0.055       | 0.062          |
|     |                              |          | CP (asymptotic CI)        | 0.932                   | 0.951        | 0.949       | 0.957          |
|     |                              |          | CP (bootstrap CI)         | 0.958                   | 0.963        | 0.947       | 0.962          |
|     | (0.0005, -4.5, -0.125, 0.5)  | 1512.57  | bias ( $\times 10^{-2}$ ) | $8.517 \times 10^{-4}$  | 2.185        | 0.188       | 0.324          |
|     |                              |          | RMSE                      | $7.362 \times 10^{-5}$  | 0.074        | 0.074       | 0.053          |
|     |                              |          | CP (asymptotic CI)        | 0.927                   | 0.968        | 0.940       | 0.951          |
|     |                              |          | CP (bootstrap CI)         | 0.940                   | 0.951        | 0.958       | 0.965          |
|     | (0.0005, -4.5, -0.1, 0.5)    | 1493.20  | bias ( $\times 10^{-2}$ ) | $8.546 \times 10^{-4}$  | 1.439        | 0.224       | 0.283          |
|     |                              |          | RMSE                      | $4.574 \times 10^{-5}$  | 0.161        | 0.065       | 0.045          |
|     |                              |          | CP (asymptotic)           | 0.943                   | 0.937        | 0.948       | 0.955          |
|     |                              |          | CP (bootstrap)            | 0.953                   | 0.949        | 0.954       | 0.960          |
| 60  | (0.0005, -4.5, -0.2, 0.5)    | 1528.65  | bias ( $\times 10^{-2}$ ) | $1.158 \times 10^{-3}$  | 0.452        | 0.113       | 0.154          |
|     |                              |          | RMSE                      | $2.576 \times 10^{-4}$  | 0.035        | 0.031       | 0.045          |
|     |                              |          | CP (asymptotic CI)        | 0.937                   | 0.944        | 0.956       | 0.940          |
|     |                              |          | CP (bootstrap CI)         | 0.949                   | 0.957        | 0.963       | 0.954          |
|     | (0.0005, -4.5, -0.125, 0.5)  | 1956.72  | bias ( $\times 10^{-2}$ ) | $5.034 \times 10^{-4}$  | 1.309        | 0.074       | -0.262         |
|     |                              |          | RMSE                      | $6.385 \times 10^{-5}$  | 0.042        | 0.069       | 0.068          |
|     |                              |          | CP (asymptotic CI)        | 0.935                   | 0.955        | 0.946       | 0.956          |
|     |                              |          | CP (bootstrap CI)         | 0.948                   | 0.947        | 0.954       | 0.966          |
|     | (0.0005, -4.5, -0.1, 0.5)    | 2130.28  | bias ( $\times 10^{-2}$ ) | $5.289 \times 10^{-4}$  | 0.578        | 0.120       | -0.187         |
|     |                              |          | RMSE                      | $2.193 \times 10^{-5}$  | 0.132        | 0.025       | 0.036          |
|     |                              |          | CP (asymptotic CI)        | 0.927                   | 0.949        | 0.952       | 0.954          |
|     |                              |          | CP (bootstrap CI)         | 0.945                   | 0.946        | 0.953       | 0.965          |

Table 18: Biases and RMSEs of the MLE, the coverage probability (CP) of the 95% asymptotic confidence interval (CI) and 95% bootstrap confidence interval and average computation time (in seconds), computed based on 1,000 Monte Carlo replications, under the LLP-Lognormal model with the PM time interval:  $\Delta = 365$ .

| $n$ | $(\beta, \eta, \alpha, \nu)$ | Run time |                           | $\hat{\beta}$          | $\hat{\eta}$ | $\hat{\alpha}$ | $\hat{\nu}$ |
|-----|------------------------------|----------|---------------------------|------------------------|--------------|----------------|-------------|
| 30  | (0.0005, -4.5, 4, 5)         | 1482.60  | bias ( $\times 10^{-2}$ ) | $3.578 \times 10^{-4}$ | 1.132        | 7.631          | 11.272      |
|     |                              |          | RMSE                      | $1.543 \times 10^{-4}$ | 0.181        | 1.287          | 1.352       |
|     |                              |          | CP (asymptotic CI)        | 0.918                  | 0.944        | 0.953          | 0.962       |
|     |                              |          | CP (bootstrap CI)         | 0.947                  | 0.952        | 0.947          | 0.973       |
|     | (0.0005, -4.5, 5, 5)         | 2319.67  | bias ( $\times 10^{-2}$ ) | $6.451 \times 10^{-3}$ | 1.745        | 3.451          | -6.923      |
|     |                              |          | RMSE                      | $2.947 \times 10^{-4}$ | 0.153        | 0.891          | 1.035       |
|     |                              |          | CP (asymptotic CI)        | 0.925                  | 0.942        | 0.956          | 0.961       |
|     |                              |          | CP (bootstrap CI)         | 0.931                  | 0.947        | 0.959          | 0.965       |
| 45  | (0.0005, -4.5, 4, 5)         | 1766.25  | bias ( $\times 10^{-2}$ ) | $6.984 \times 10^{-3}$ | -0.461       | 4.175          | -8.238      |
|     |                              |          | RMSE                      | $9.737 \times 10^{-5}$ | 0.110        | 0.715          | 0.851       |
|     |                              |          | CP (asymptotic CI)        | 0.926                  | 0.950        | 0.945          | 0.953       |
|     |                              |          | CP (bootstrap CI)         | 0.937                  | 0.953        | 0.949          | 0.948       |
|     | (0.0005, -4.5, 5, 5)         | 2832.71  | bias ( $\times 10^{-2}$ ) | $5.275 \times 10^{-3}$ | -1.278       | 2.923          | -3.040      |
|     |                              |          | RMSE                      | $1.104 \times 10^{-4}$ | 0.116        | 0.767          | 0.691       |
|     |                              |          | CP (asymptotic CI)        | 0.928                  | 0.937        | 0.949          | 0.952       |
|     |                              |          | CP (bootstrap CI)         | 0.935                  | 0.942        | 0.956          | 0.955       |
| 60  | (0.0005, -4.5, 4, 5)         | 2489.21  | bias ( $\times 10^{-2}$ ) | $8.437 \times 10^{-4}$ | 0.559        | 2.135          | -2.467      |
|     |                              |          | RMSE                      | $6.746 \times 10^{-5}$ | 0.094        | 0.632          | 0.644       |
|     |                              |          | CP (asymptotic CI)        | 0.940                  | 0.953        | 0.949          | 0.964       |
|     |                              |          | CP (bootstrap CI)         | 0.945                  | 0.951        | 0.953          | 0.958       |
|     | (0.0005, -4.5, 5, 5)         | 3251.04  | bias ( $\times 10^{-2}$ ) | $8.042 \times 10^{-4}$ | 0.541        | 1.692          | -1.816      |
|     |                              |          | RMSE                      | $7.763 \times 10^{-5}$ | 0.093        | 0.558          | 0.720       |
|     |                              |          | CP (asymptotic CI)        | 0.938                  | 0.942        | 0.956          | 0.948       |
|     |                              |          | CP (bootstrap CI)         | 0.946                  | 0.943        | 0.967          | 0.959       |



Table 19: Biases and RMSEs of the MLE, the coverage probability (CP) of the 95% asymptotic confidence interval (CI) and 95% bootstrap confidence interval and average computation time (in seconds), computed based on 1,000 Monte Carlo replications, under the LLP-Lognormal model with the PM time interval:  $\Delta = 450$ .

| $n$ | $(\beta, \eta, \alpha, \nu)$ | Run time |                           | $\hat{\beta}$           | $\hat{\eta}$ | $\hat{\alpha}$ | $\hat{\nu}$ |
|-----|------------------------------|----------|---------------------------|-------------------------|--------------|----------------|-------------|
| 30  | (0.0005, -4.5, 4, 5)         | 1346.54  | bias ( $\times 10^{-2}$ ) | $5.759 \times 10^{-3}$  | 3.712        | 3.144          | 5.175       |
|     |                              |          | RMSE                      | $4.109 \times 10^{-4}$  | 0.153        | 1.104          | 1.503       |
|     |                              |          | CP (asymptotic CI)        | 0.922                   | 0.941        | 0.948          | 0.956       |
|     |                              |          | CP (bootstrap CI)         | 0.928                   | 0.956        | 0.955          | 0.943       |
|     | (0.0005, -4.5, 5, 5)         | 1745.30  | bias ( $\times 10^{-2}$ ) | $-7.351 \times 10^{-3}$ | 4.386        | 3.181          | 3.465       |
|     |                              |          | RMSE                      | $4.166 \times 10^{-4}$  | 0.152        | 1.256          | 1.761       |
|     |                              |          | CP (asymptotic CI)        | 0.927                   | 0.937        | 0.944          | 0.938       |
|     |                              |          | CP (bootstrap CI)         | 0.934                   | 0.943        | 0.953          | 0.946       |
| 45  | (0.0005, -4.5, 4, 5)         | 1724.51  | bias ( $\times 10^{-2}$ ) | $2.085 \times 10^{-3}$  | 2.871        | -2.109         | -3.156      |
|     |                              |          | RMSE                      | $3.671 \times 10^{-4}$  | 0.115        | 0.886          | 1.342       |
|     |                              |          | CP (asymptotic CI)        | 0.927                   | 0.953        | 0.939          | 0.958       |
|     |                              |          | CP (bootstrap CI)         | 0.939                   | 0.957        | 0.948          | 0.967       |
|     | (0.0005, -4.5, 5, 5)         | 2306.41  | bias ( $\times 10^{-2}$ ) | $6.573 \times 10^{-3}$  | 3.006        | 2.367          | 2.142       |
|     |                              |          | RMSE                      | $3.341 \times 10^{-4}$  | 0.130        | 1.438          | 0.942       |
|     |                              |          | CP (asymptotic CI)        | 0.934                   | 0.931        | 0.953          | 0.936       |
|     |                              |          | CP (bootstrap CI)         | 0.931                   | 0.955        | 0.964          | 0.949       |
| 60  | (0.0005, -4.5, 4, 5)         | 1974.93  | bias ( $\times 10^{-2}$ ) | $8.410 \times 10^{-4}$  | -1.632       | 1.123          | 2.110       |
|     |                              |          | RMSE                      | $1.042 \times 10^{-4}$  | 0.094        | 0.926          | 1.192       |
|     |                              |          | CP (asymptotic CI)        | 0.923                   | 0.967        | 0.942          | 0.950       |
|     |                              |          | CP (bootstrap CI)         | 0.945                   | 0.963        | 0.945          | 0.956       |
|     | (0.0005, -4.5, 5, 5)         | 2792.48  | bias ( $\times 10^{-2}$ ) | $9.208 \times 10^{-4}$  | -1.150       | -1.110         | -1.104      |
|     |                              |          | RMSE                      | $7.796 \times 10^{-5}$  | 0.084        | 0.894          | 0.859       |
|     |                              |          | CP (asymptotic CI)        | 0.930                   | 0.963        | 0.941          | 0.958       |
|     |                              |          | CP (bootstrap CI)         | 0.937                   | 0.967        | 0.953          | 0.964       |

Table 20: Biases and RMSEs of the MLE, the coverage probability (CP) of the 95% asymptotic confidence interval (CI) and 95% bootstrap confidence interval and average computation time (in seconds), computed based on 1,000 Monte Carlo replications, under the LLP-Lognormal model with the PM time interval:  $\Delta = 540$ .

| $n$ | $(\beta, \eta, \alpha, \nu)$ | Run time |                           | $\hat{\beta}$           | $\hat{\eta}$ | $\hat{\alpha}$ | $\hat{\nu}$ |
|-----|------------------------------|----------|---------------------------|-------------------------|--------------|----------------|-------------|
| 30  | (0.0005, -4.5, 4, 5)         | 915.11   | bias ( $\times 10^{-2}$ ) | $5.853 \times 10^{-3}$  | 1.457        | 3.783          | 5.325       |
|     |                              |          | RMSE                      | $3.653 \times 10^{-4}$  | 0.142        | 1.244          | 1.571       |
|     |                              |          | CP (asymptotic CI)        | 0.922                   | 0.944        | 0.951          | 0.942       |
|     |                              |          | CP (bootstrap CI)         | 0.947                   | 0.954        | 0.963          | 0.970       |
|     | (0.0005, -4.5, 5, 5)         | 1109.93  | bias ( $\times 10^{-2}$ ) | $-1.392 \times 10^{-5}$ | 0.794        | 4.681          | 6.750       |
|     |                              |          | RMSE                      | $1.162 \times 10^{-4}$  | 0.115        | 1.698          | 1.847       |
|     |                              |          | CP (asymptotic CI)        | 0.925                   | 0.947        | 0.944          | 0.958       |
|     |                              |          | CP (bootstrap CI)         | 0.953                   | 0.961        | 0.954          | 0.960       |
| 45  | (0.0005, -4.5, 4, 5)         | 997.70   | bias ( $\times 10^{-2}$ ) | $-2.320 \times 10^{-3}$ | 0.813        | 3.512          | 4.708       |
|     |                              |          | RMSE                      | $1.079 \times 10^{-4}$  | 0.105        | 1.035          | 1.189       |
|     |                              |          | CP (asymptotic CI)        | 0.923                   | 0.963        | 0.959          | 0.961       |
|     |                              |          | CP (bootstrap CI)         | 0.947                   | 0.954        | 0.963          | 0.970       |
|     | (0.0005, -4.5, 5, 5)         | 1436.84  | bias ( $\times 10^{-2}$ ) | $8.466 \times 10^{-4}$  | 1.156        | 2.464          | 3.512       |
|     |                              |          | RMSE                      | $7.641 \times 10^{-5}$  | 0.103        | 1.450          | 1.953       |
|     |                              |          | CP (asymptotic CI)        | 0.932                   | 0.958        | 0.941          | 0.942       |
|     |                              |          | CP (bootstrap CI)         | 0.940                   | 0.961        | 0.939          | 0.947       |
| 60  | (0.0005, -4.5, 4, 5)         | 1657.03  | bias ( $\times 10^{-2}$ ) | $-5.492 \times 10^{-4}$ | 0.572        | 1.401          | 2.538       |
|     |                              |          | RMSE                      | $7.875 \times 10^{-5}$  | 0.077        | 0.782          | 1.163       |
|     |                              |          | CP (asymptotic CI)        | 0.943                   | 0.946        | 0.955          | 0.966       |
|     |                              |          | CP (bootstrap CI)         | 0.944                   | 0.955        | 0.961          | 0.972       |
|     | (0.0005, -4.5, 5, 5)         | 1810.24  | bias ( $\times 10^{-2}$ ) | $3.092 \times 10^{-4}$  | -0.714       | 1.246          | 1.289       |
|     |                              |          | RMSE                      | $5.134 \times 10^{-5}$  | 0.069        | 1.019          | 1.064       |
|     |                              |          | CP (asymptotic CI)        | 0.944                   | 0.960        | 0.952          | 0.957       |
|     |                              |          | CP (bootstrap CI)         | 0.939                   | 0.965        | 0.947          | 0.946       |

Table 21: Biases and RMSEs of the MLE, the coverage probability (CP) of the 95% asymptotic confidence interval (CI) and 95% bootstrap confidence interval and average computation time (in seconds), computed based on 1,000 Monte Carlo replications, under the LLP-Lognormal model with the PM time interval:  $\Delta = 630$ .

| $n$ | $(\beta, \eta, \alpha, \nu)$ | Run time |                           | $\hat{\beta}$           | $\hat{\eta}$ | $\hat{\alpha}$ | $\hat{\nu}$ |
|-----|------------------------------|----------|---------------------------|-------------------------|--------------|----------------|-------------|
| 30  | (0.0005, -4.5, 4, 5)         | 779.96   | bias ( $\times 10^{-2}$ ) | $-2.178 \times 10^{-3}$ | 1.687        | 3.246          | 3.322       |
|     |                              |          | RMSE                      | $8.652 \times 10^{-4}$  | 0.135        | 1.783          | 1.862       |
|     |                              |          | CP (asymptotic CI)        | 0.912                   | 0.938        | 0.967          | 0.959       |
|     |                              |          | CP (bootstrap CI)         | 0.944                   | 0.943        | 0.958          | 0.963       |
|     | (0.0005, -4.5, 5, 5)         | 932.16   | bias ( $\times 10^{-2}$ ) | $-4.841 \times 10^{-4}$ | 1.528        | 2.785          | 2.891       |
|     |                              |          | RMSE                      | $2.193 \times 10^{-4}$  | 0.124        | 1.260          | 1.135       |
|     |                              |          | CP (asymptotic CI)        | 0.927                   | 0.953        | 0.956          | 0.943       |
|     |                              |          | CP (bootstrap CI)         | 0.934                   | 0.957        | 0.965          | 0.957       |
| 45  | (0.0005, -4.5, 4, 5)         | 974.70   | bias ( $\times 10^{-2}$ ) | $7.945 \times 10^{-4}$  | 1.470        | 0.983          | 2.618       |
|     |                              |          | RMSE                      | $3.731 \times 10^{-4}$  | 0.103        | 1.044          | 1.236       |
|     |                              |          | CP (asymptotic CI)        | 0.926                   | 0.945        | 0.954          | 0.948       |
|     |                              |          | CP (bootstrap CI)         | 0.949                   | 0.952        | 0.953          | 0.966       |
|     | (0.0005, -4.5, 5, 5)         | 1035.32  | bias ( $\times 10^{-2}$ ) | $-8.396 \times 10^{-5}$ | -1.008       | 1.294          | 1.312       |
|     |                              |          | RMSE                      | $7.232 \times 10^{-5}$  | 0.088        | 1.300          | 1.394       |
|     |                              |          | CP (asymptotic CI)        | 0.930                   | 0.965        | 0.957          | 0.952       |
|     |                              |          | CP (bootstrap CI)         | 0.942                   | 0.956        | 0.951          | 0.968       |
| 60  | (0.0005, -4.5, 4, 5)         | 1338.29  | bias ( $\times 10^{-2}$ ) | $-1.302 \times 10^{-5}$ | 0.849        | 1.145          | 1.176       |
|     |                              |          | RMSE                      | $7.839 \times 10^{-3}$  | 0.078        | 0.916          | 1.174       |
|     |                              |          | CP (asymptotic CI)        | 0.923                   | 0.958        | 0.933          | 0.950       |
|     |                              |          | CP (bootstrap CI)         | 0.940                   | 0.954        | 0.941          | 0.968       |
|     | (0.0005, -4.5, 5, 5)         | 1624.81  | bias ( $\times 10^{-2}$ ) | $6.544 \times 10^{-5}$  | 0.756        | 0.889          | 1.075       |
|     |                              |          | RMSE                      | $4.113 \times 10^{-5}$  | 0.054        | 0.752          | 0.408       |
|     |                              |          | CP (asymptotic CI)        | 0.939                   | 0.947        | 0.952          | 0.961       |
|     |                              |          | CP (bootstrap CI)         | 0.945                   | 0.957        | 0.958          | 0.963       |

## References

- Andersen, P. K., Borgan, O., Gill, R. D., and Keiding, N. (2012), *Statistical Models based on Counting Processes*, Springer Science & Business Media.
- Asmussen, S. and Glynn, P. W. (2007), *Stochastic Simulation: Algorithms and Analysis*, vol. 57, Springer.
- Berger, J. O., Bernardo, J. M., and Sun, D. (2009), “The formal definition of reference priors,” *The Annals of Statistics*, 37(2), 905–938.
- Brooks, S. P. and Gelman, A. (1998), “General methods for monitoring convergence of iterative simulations,” *Journal of Computational and Graphical Statistics*, 7(4), 434–455.
- Caffisch, R. E. (1998), “Monte Carlo and quasi-Monte Carlo methods,” *Acta Numerica*, 7, 1–49.
- Chauvel, C., Dauxois, J.-Y., Doyen, L., and Gaudoin, O. (2016), “Parametric bootstrap goodness-of-fit tests for imperfect maintenance models,” *IEEE Transactions on Reliability*, 65(3), 1343–1359.
- Cook, R. J., Lawless, J. F., et al. (2007), *The Statistical Analysis of Recurrent Events*, Springer.
- Cox, D. R. (1959), “The analysis of exponentially distributed life-times with two types of failure,” *Journal of the Royal Statistical Society: Series B (Methodological)*, 21(2), 411–421.
- Crowder, M. J. (2001), *Classical Competing Risks*, CRC Press.
- Dijoux, Y. and Gaudoin, O. (2009), “The alert-delay competing risks model for maintenance analysis,” *Journal of Statistical Planning and Inference*, 139(5), 1587–1603.
- Doyen, L. and Gaudoin, O. (2004), “Classes of imperfect repair models based on reduction of failure intensity or virtual age,” *Reliability Engineering & System Safety*, 84(1), 45–56.
- (2006), “Imperfect maintenance in a generalized competing risks framework,” *Journal of Applied Probability*, 43(3), 825–839.
- (2011), “Modeling and assessment of aging and efficiency of corrective and planned preventive maintenance,” *IEEE Transactions on Reliability*, 60(4), 759–769.

- Efron, B. and Tibshirani, R. J. (1994), *An Introduction to the Bootstrap*, CRC press.
- Gail, M. (1975), “A review and critique of some models used in competing risk analysis,” *Biometrics*, 209–222.
- Gelman, A. (2006), “Prior distributions for variance parameters in hierarchical models (comment on article by Browne and Draper),” *Bayesian Analysis*, 1(3), 515–534.
- (2009), “Bayes, Jeffreys, prior distributions and the philosophy of statistics,” *Statistical Science*, 24(2), 176–178.
- Gelman, A. and Rubin, D. B. (1992), “Inference from iterative simulation using multiple sequences,” *Statistical Science*, 457–472.
- George, E. I. and McCulloch, R. E. (1993), “Variable selection via Gibbs sampling,” *Journal of the American Statistical Association*, 88(423), 881–889.
- Geweke, J. (1992), “Evaluating the accuracy of sampling-based approaches to the calculations of posterior moments,” *Bayesian Statistics*, 4, 641–649.
- Gong, L. and Flegal, J. M. (2016), “A practical sequential stopping rule for high-dimensional Markov chain Monte Carlo,” *Journal of Computational and Graphical Statistics*, 25(3), 684–700.
- Green, P. J. and Mira, A. (2001), “Delayed rejection in reversible jump Metropolis–Hastings,” *Biometrika*, 88(4), 1035–1053.
- Haario, H., Saksman, E., and Tamminen, J. (1999), “Adaptive proposal distribution for random walk Metropolis algorithm,” *Computational Statistics*, 14(3), 375–395.
- (2001), “An adaptive Metropolis algorithm,” *Bernoulli*, 223–242.
- Niederreiter, H. (1992), *Random Number Generation and Quasi-Monte Carlo Methods*, SIAM.
- R Core Team (2020), *R: A Language and Environment for Statistical Computing*, R Foundation for Statistical Computing, Vienna, Austria.

- Spiegelhalter, D., Thomas, A., Best, N., and Gilks, W. (1996), “BUGS 0.5: Bayesian inference using Gibbs sampling manual (version ii),” *MRC Biostatistics Unit, Institute of Public Health, Cambridge, UK*, 1–59.
- Syversveen, A. R. (1998), “Noninformative bayesian priors. interpretation and problems with construction and applications,” *Preprint Statistics*, 3(3), 1–11.
- Tierney, L. and Mira, A. (1999), “Some adaptive Monte Carlo methods for Bayesian inference,” *Statistics in Medicine*, 18(17-18), 2507–2515.
- Wang, X. and Fang, K.-T. (2003), “The effective dimension and quasi-Monte Carlo integration,” *Journal of Complexity*, 19(2), 101–124.
